# Supplementary material for: Effect of meso-pentafluorophenyl group on two-photon absorption in heterocorroles and heterocorrins
Source: Royal Society of Chemistry journal article supplement (doi:10.1039/d4cp03450c), 2024-01-01
Supplement: d4cp03450c1.pdf [file d4cp03450c1.pdf]

## Effect of *meso*-pentafluorophenyl group on two-photon absorption in heterocorroles and heterocorrins

Banana Tejendra<sup>a</sup>, Swati Singh Rajput<sup>a</sup>, Neelam Chandravanshi<sup>a</sup> and Md Mehboob Alam<sup>a,b\*</sup>

<sup>a</sup> Department of Chemistry, Indian Institute of Technology Bhilai, Durg, Chhattisgarh, India – 491002

<sup>b</sup> Department of Materials Science and Metallurgical Engineering, Indian Institute of Technology Bhilai, Durg, Chhattisgarh, India - 491002

Email: mehboob@iitbhilai.ac.in

### Contents

1. Oscillator strengths & excitation energies of  $S_0 \rightarrow S_1$  and  $S_0 \rightarrow S_2$  transitions
2. TPA strengths [RI-CC2] of  $S_0 \rightarrow S_1$  and  $S_0 \rightarrow S_2$  transitions
3. TPA strengths [GFSM] of  $S_0 \rightarrow S_1$  and  $S_0 \rightarrow S_2$  transitions
4. Magnitudes of different dipole moments and transition dipole moments
5. NTOs for  $S_0 \rightarrow S_1$  and  $S_0 \rightarrow S_2$  transitions
6. Effect of basis set on magnitudes of different dipole moments and transition dipole moments
7. Effect of different *meso*-substituents on OPA, TPA, excitation energies and MOs
8. Optimized Coordinates of the ground-state geometry

## 1. Oscillator strengths & Excitation energies of S0 → S1 and S0 → S2 transitions :

The table presents the oscillator strengths and excitation energies of first 2 singlet states (S1 and S2) of all the considered systems calculated at RICC2/cc-pVDZ level of theory as implemented in Turbomole 7.3 program.

**ST1a** : Heterocorroles

| System            | S1-Ex.Ene (eV) | S1-Osc.stgh | S2-Ex.Ene (eV) | S2-Osc.stgh |
|-------------------|----------------|-------------|----------------|-------------|
| Corrole           | 2.43           | 0.049727    | 2.66           | 0.129657    |
| PFPh-Corrole      | 2.34           | 0.050315    | 2.54           | 0.249763    |
| 10-NH-Cor         | 2.57           | 0.032543    | 2.78           | 0.014696    |
| 10-NH-PFPh-Cor    | 2.44           | 0.033384    | 2.64           | 0.031042    |
| 10-NMe-Cor        | 2.53           | 0.030474    | 2.75           | 0.003680    |
| 10-NMe-PFPh-Cor   | 2.40           | 0.031985    | 2.60           | 0.013977    |
| 10-O-Cor          | 2.58           | 0.106761    | 2.90           | 0.029154    |
| 10-O-PFPh-Cor     | 2.45           | 0.157800    | 2.70           | 0.060219    |
| 10-S-Cor          | 2.52           | 0.063456    | 2.78           | 0.022741    |
| 10-S-PFPh-Cor     | 2.39           | 0.075362    | 2.61           | 0.061736    |
| 10-Se-Cor         | 2.48           | 0.090948    | 2.76           | 0.028450    |
| 10-Se-PFPh-Cor    | 2.35           | 0.116790    | 2.59           | 0.063633    |
| 10-SiMe2-Cor      | 2.21           | 0.135410    | 3.17           | 0.012432    |
| 10-SiMe2-PFPh-Cor | 2.07           | 0.200827    | 2.92           | 0.023084    |
| 20-O-Cor          | 2.45           | 0.038268    | 2.71           | 0.135031    |
| 20-O-PFPh-Cor     | 2.38           | 0.042282    | 2.63           | 0.237112    |
| 21-O-Cor          | 2.37           | 0.034561    | 2.73           | 0.061921    |
| 21-O-PFPh-Cor     | 2.30           | 0.042803    | 2.65           | 0.062467    |
| 21-S-Cor          | 2.27           | 0.034681    | 2.68           | 0.044813    |
| 21-S-PFPh-Cor     | 2.11           | 0.038193    | 2.44           | 0.141924    |
| N1-Con-Cor        | 1.87           | 0.179844    | 2.32           | 0.034565    |
| N1-Con-PFPh-Cor   | 1.80           | 0.337440    | 2.18           | 0.027282    |
| N2-Con-Cor        | 2.30           | 0.245744    | 2.68           | 0.128024    |
| N2-Con-PFPh-Cor   | 2.12           | 0.377529    | 2.42           | 0.159767    |
| Neo-Con-Cor       | 2.25           | 0.222583    | 2.74           | 0.050071    |
| Neo-Con-PFPh-Cor  | 2.11           | 0.352916    | 2.54           | 0.070744    |

**ST1b : Heterocorrins**

| <b>System</b>        | <b>S1-Ex.Ene<br/>(eV)</b> | <b>S1-Osc.stgh</b> | <b>S2-Ex.Ene<br/>(eV)</b> | <b>S2-Osc.stgh</b> |
|----------------------|---------------------------|--------------------|---------------------------|--------------------|
| Corrin               | 3.11                      | 0.329812           | 3.97                      | 0.002740           |
| PFPh-Corrin          | 2.91                      | 0.505736           | 3.85                      | 0.007662           |
| 10-NH-Corrin         | 4.14                      | 0.000179           | 4.25                      | 0.153559           |
| 10-NH-PFPh-Corrin    | 3.89                      | 0.029378           | 4.01                      | 0.402123           |
| 10-NMe-Corrin        | 4.02                      | 0.155835           | 4.14                      | 0.013080           |
| 10-NMe-PFPh-Corrin   | 3.83                      | 0.341290           | 3.90                      | 0.040637           |
| 10-O-Corrin          | 4.22                      | 0.004125           | 4.72                      | 0.095447           |
| 10-O-PFPh-Corrin     | 4.02                      | 0.023079           | 4.52                      | 0.259349           |
| 10-S-Corrin          | 4.11                      | 0.000229           | 4.33                      | 0.099594           |
| 10-S-PFPh-Corrin     | 3.91                      | 0.002091           | 4.14                      | 0.289874           |
| 10-Se-Corrin         | 4.13                      | 0.001401           | 4.33                      | 0.097472           |
| 10-Se-PFPh-Corrin    | 3.96                      | 0.005912           | 4.15                      | 0.271708           |
| 10-SiMe2-Corrin      | 3.96                      | 0.002303           | 4.31                      | 0.004380           |
| 10-SiMe2-PFPh-Corrin | 3.97                      | 0.008674           | 4.30                      | 0.018997           |
| 20-O-Corrin          | 3.57                      | 0.254970           | 3.86                      | 0.028537           |
| 20-O-PFPh-Corrin     | 3.38                      | 0.207120           | 3.81                      | 0.100397           |
| 21-O-Corrin          | 4.25                      | 0.209624           | 4.68                      | 0.004836           |
| 21-O-PFPh-Corrin     | 3.92                      | 0.504829           | 4.46                      | 0.042603           |
| 21-S-Corrin          | 3.77                      | 0.205610           | 4.04                      | 0.003803           |
| 21-S-PFPh-Corrin     | 3.49                      | 0.406016           | 3.73                      | 0.019150           |
| N1-Con-Corrin        | 3.11                      | 0.158480           | 3.81                      | 0.259189           |
| N1-Con-PFPh-Corrin   | 2.87                      | 0.343980           | 3.47                      | 0.289667           |
| N2-Con-Corrin        | 3.65                      | 0.267508           | 3.82                      | 0.025439           |
| N2-Con-PFPh-Corrin   | 3.33                      | 0.428823           | 3.62                      | 0.018245           |
| Neo-Con-Corrin       | 3.35                      | 0.009083           | 3.63                      | 0.252314           |
| Neo-Con-PFPh-Corrin  | 3.33                      | 0.428823           | 3.62                      | 0.018245           |

## 2. TPA strengths [RICC2] of S0 → S1 and S0 → S2 transitions:

**ST2** : The table presents the TPA strengths (in a.u.) first 2 singlet states (S1 and S2) of all the considered systems calculated at RICC2/cc-pVDZ level of theory as implemented in Turbomole 7.3 program.

| System            | S1-TPA | S2-TPA | System               | S1-TPA | S2-TPA |
|-------------------|--------|--------|----------------------|--------|--------|
| Corrole           | 2019   | 457    | Corrin               | 910    | 21     |
| PFPh-Corrole      | 4490   | 1465   | PFPh-Corrin          | 1912   | 829    |
| 10-NH-Cor         | 4500   | 7234   | 10-NH-Corrin         | 1      | 105    |
| 10-NH-PFPh-Cor    | 13199  | 10214  | 10-NH-PFPh-Corrin    | 37     | 281    |
| 10-NMe-Cor        | 4414   | 6738   | 10-NMe-Corrin        | 133    | 11     |
| 10-NMe-PFPh-Cor   | 12081  | 9958   | 10-NMe-PFPh-Corrin   | 244    | 17     |
| 10-O-Cor          | 3524   | 11523  | 10-O-Corrin          | 4      | 84     |
| 10-O-PFPh-Cor     | 10473  | 22007  | 10-O-PFPh-Corrin     | 26     | 276    |
| 10-S-Cor          | 4536   | 8458   | 10-S-Corrin          | 3      | 168    |
| 10-S-PFPh-Cor     | 12345  | 13549  | 10-S-PFPh-Corrin     | 7      | 424    |
| 10-Se-Cor         | 4590   | 9849   | 10-Se-Corrin         | 8      | 289    |
| 10-Se-PFPh-Cor    | 11955  | 16811  | 10-Se-PFPh-Corrin    | 23     | 645    |
| 10-SiMe2-Cor      | 2301   | 36155  | 10-SiMe2-Corrin      | 14     | 50     |
| 10-SiMe2-PFPh-Cor | 3401   | 86032  | 10-SiMe2-PFPh-Corrin | 48     | 9      |
| 20-O-Cor          | 1675   | 414    | 20-O-Corrin          | 273    | 163    |
| 20-O-PFPh-Cor     | 3421   | 1132   | 20-O-PFPh-Corrin     | 1567   | 1690   |
| 21-O-Cor          | 1907   | 2380   | 21-O-Corrin          | 112    | 60     |
| 21-O-PFPh-Cor     | 3748   | 4207   | 21-O-PFPh-Corrin     | 389    | 1695   |
| 21-S-Cor          | 1697   | 1802   | 21-S-Corrin          | 401    | 25     |
| 21-S-PFPh-Cor     | 4576   | 4296   | 21-S-PFPh-Corrin     | 645    | 92     |
| N1-Con-Cor        | 3237   | 5477   | N1-Con-Corrin        | 504    | 2869   |
| N1-Con-PFPh-Cor   | 13235  | 16708  | N1-Con-PFPh-Corrin   | 689    | 16319  |
| N2-Con-Cor        | 447    | 13429  | N2-Con-Corrin        | 128    | 16     |
| N2-Con-PFPh-Cor   | 553    | 31591  | N2-Con-PFPh-Corrin   | 1629   | 42     |
| Neo-Con-Cor       | 2937   | 8312   | Neo-Con-Corrin       | 432    | 168    |
| Neo-Con-PFPh-Cor  | 8012   | 24318  | Neo-Con-PFPh-Corrin  | 1629   | 42     |

### 3. TPA strengths [GFSM] of S0 → S1 and S0 → S2 transitions :

**ST3 :** The table presents the TPA strengths (in a.u.) of S2 state evaluated employing 3SM (S1 as intermediate), 3SM (S3 as intermediate), and 4SM for those PFPh-substituted corroles and corrins (and their respective unsubstituted analogues) having the top 5 highest TPA-RICC2 strengths.

| System              | 3SM(i=1) | 3SM(i=3) | 4SM(i=1,3) |
|---------------------|----------|----------|------------|
| 10-O-cor            | 1136     | 3190     | 6945       |
| 10-O-PFPh-cor       | 2161     | 11720    | 19210      |
| 10-Se-cor           | 584      | 6149     | 9222       |
| 10-Se-PFPh-cor      | 883      | 14570    | 18380      |
| 10-Sime2-cor        | 28720    | 225      | 27500      |
| 10-Sime2-PFPh-cor   | 69010    | 318      | 66000      |
| N2-Con-cor          | 7406     | 750      | 8088       |
| N2-Con-PFPh-cor     | 18060    | 422      | 17900      |
| Neo-Con-cor         | 2565     | 365      | 3209       |
| Neo-Con-PFPh-cor    | 9240     | 971      | 10360      |
| Corrole             | 53       | 599      | 598        |
| PFPh-Corrole        | 83       | 1442     | 1066       |
|                     |          |          |            |
| 20-O-corrin         | 59       | 22       | 119        |
| 20-O-PFPh-corrin    | 1366     | 174      | 1441       |
| 21-O-corrin         | 27       | 1        | 27         |
| 21-O-PFPh-corrin    | 1673     | 163.2    | 1704       |
| N1-Con-corrin       | 2598     | 861      | 2426       |
| N1-Con-PFPh-corrin  | 21260    | 487      | 17930      |
| N2-Con-corrin       | 45       | 19       | 68         |
| N2-Con-PFPh-corrin  | 115      | 88       | 166        |
| Neo-Con-corrin      | 261      | 393      | 386        |
| Neo-Con-PFPh-corrin | 3092     | 3465     | 3479       |
| Corrin              | 16       | 1        | 15         |
| PFPh-Corrin         | 746      | 6        | 810        |

#### 4. Magnitudes of different dipole moments and transition dipole moments :

The following tables presents the state dipole strengths (in a.u.) of S0, S1, S2, S3 states and transition dipole strengths between the said states for those PFPh-substituted corroles and corrins (and their respective unsubstituted analogues) having the top 5 larger TPA-RICC2 strengths, which are evaluated RICC2/cc-pVDZ level of theory.

**ST4a :** Dipole strengths of considered corroles

| System            | $\mu_{00}$ | $\mu_{11}$ | $\mu_{22}$ | $\mu_{33}$ |
|-------------------|------------|------------|------------|------------|
| Corrole           | 0.698      | 0.655      | 0.876      | 1.064      |
| PFPh-Corrole      | 1.428      | 1.241      | 1.562      | 1.814      |
| 10-O-Cor          | 0.226      | 0.828      | 0.703      | 0.451      |
| 10-O-PFPh-Cor     | 0.317      | 1.305      | 1.058      | 0.652      |
| 10-Se-Cor         | 0.11       | 0.845      | 0.576      | 0.872      |
| 10-Se-PFPh-Cor    | 0.35       | 1.221      | 0.874      | 1.092      |
| 10-SiMe2-Cor      | 0.072      | 0.63       | 0.68       | 0.498      |
| 10-SiMe2-PFPh-Cor | 0.37       | 0.827      | 0.778      | 0.794      |
| N2-Con-Cor        | 1.435      | 1.747      | 2.172      | 2.085      |
| N2-Con-PFPh-Cor   | 2.058      | 2.351      | 2.656      | 2.702      |
| Neo-Con-Cor       | 0.545      | 1.069      | 0.47       | 0.795      |
| Neo-Con-PFPh-Cor  | 0.487      | 1.121      | 0.744      | 0.978      |

**ST4b :** Transition dipole strengths of considered corroles

| System            | $\mu_{01}$ | $\mu_{02}$ | $\mu_{03}$ | $\mu_{10}$ | $\mu_{12}$ | $\mu_{13}$ | $\mu_{20}$ | $\mu_{22}$ | $\mu_{23}$ | $\mu_{30}$ | $\mu_{31}$ | $\mu_{32}$ |
|-------------------|------------|------------|------------|------------|------------|------------|------------|------------|------------|------------|------------|------------|
| Corrole           | 1.05       | 1.68       | 3.88       | 0.80       | 0.28       | 1.28       | 1.19       | 0.39       | 0.82       | 2.51       | 1.17       | 0.78       |
| PFPh-Corrole      | 1.06       | 2.42       | 4.46       | 0.84       | 0.31       | 0.60       | 1.66       | 0.49       | 1.40       | 2.92       | 0.84       | 1.00       |
| 10-O-Cor          | 1.59       | 0.71       | 3.08       | 1.06       | 1.19       | 1.14       | 0.58       | 0.88       | 2.54       | 1.94       | 1.18       | 2.58       |
| 10-O-PFPh-Cor     | 2.00       | 1.07       | 3.59       | 1.31       | 1.07       | 1.67       | 0.85       | 0.68       | 2.85       | 2.16       | 1.69       | 2.97       |
| 10-Se-Cor         | 1.47       | 0.78       | 3.02       | 0.99       | 0.87       | 1.35       | 0.56       | 0.58       | 2.78       | 1.85       | 1.51       | 2.83       |
| 10-Se-PFPh-Cor    | 1.75       | 1.15       | 3.84       | 1.16       | 0.68       | 1.89       | 0.88       | 0.36       | 2.84       | 2.32       | 1.97       | 2.89       |
| 10-SiMe2-Cor      | 2.03       | 0.48       | 4.26       | 1.23       | 2.94       | 1.34       | 0.33       | 2.50       | 0.47       | 2.61       | 1.17       | 0.40       |
| 10-SiMe2-PFPh-Cor | 2.56       | 0.68       | 3.98       | 1.55       | 3.54       | 1.39       | 0.47       | 2.94       | 0.48       | 2.46       | 1.13       | 0.44       |
| N2-Con-Cor        | 2.57       | 1.75       | 3.25       | 1.70       | 1.65       | 1.61       | 1.12       | 1.29       | 0.30       | 2.07       | 0.78       | 0.25       |
| N2-Con-PFPh-Cor   | 3.32       | 2.03       | 3.99       | 2.19       | 1.96       | 2.18       | 1.33       | 1.51       | 0.17       | 2.55       | 1.03       | 0.04       |
| Neo-Con-Cor       | 2.45       | 1.00       | 2.85       | 1.65       | 1.15       | 0.52       | 0.75       | 0.77       | 1.35       | 2.05       | 0.34       | 1.15       |
| Neo-Con-PFPh-Cor  | 3.23       | 1.21       | 3.45       | 2.11       | 1.41       | 0.52       | 0.94       | 0.91       | 1.45       | 2.63       | 0.37       | 1.10       |

**ST4c** : Dipole strengths of considered corrins

| System              | $\mu_{00}$ | $\mu_{11}$ | $\mu_{22}$ | $\mu_{33}$ |
|---------------------|------------|------------|------------|------------|
| Corrin              | 0.896      | 1.722      | 0.687      | 0.596      |
| PFPh-Corrin         | 1.207      | 2.211      | 0.889      | 1.48       |
| 20-O-Corrin         | 1.246      | 1.546      | 1.203      | 0.704      |
| 20-O-PFPh-Corrin    | 1.139      | 2.414      | 1.967      | 1.97       |
| 21-O-Corrin         | 2.09       | 1.875      | 1.481      | 1.096      |
| 21-O-PFPh-Corrin    | 1.858      | 1.192      | 1.233      | 1.852      |
| N1-Con-Corrin       | 1.029      | 1.292      | 1.96       | 0.927      |
| N1-Con-PFPh-Corrin  | 1.1        | 1.44       | 1.762      | 1.629      |
| N2-Con-Corrin       | 1.661      | 1.395      | 1.599      | 1.636      |
| N2-Con-PFPh-Corrin  | 1.417      | 1.07       | 1.081      | 3.047      |
| Neo-Con-Corrin      | 1.411      | 3.045      | 1.128      | 1.236      |
| Neo-Con-PFPh-Corrin | 1.338      | 3.686      | 0.922      | 1.014      |

**ST4d** : Transition dipole strengths of considered corrins

| System              | $\mu_{01}$ | $\mu_{02}$ | $\mu_{03}$ | $\mu_{10}$ | $\mu_{12}$ | $\mu_{13}$ | $\mu_{20}$ | $\mu_{21}$ | $\mu_{23}$ | $\mu_{30}$ | $\mu_{31}$ | $\mu_{32}$ |
|---------------------|------------|------------|------------|------------|------------|------------|------------|------------|------------|------------|------------|------------|
| Corrin              | 2.69       | 0.22       | 1.52       | 1.61       | 0.12       | 2.23       | 0.13       | 0.10       | 0.10       | 0.83       | 1.78       | 0.09       |
| PFPh-Corrin         | 3.46       | 0.39       | 1.78       | 2.05       | 0.48       | 2.88       | 0.21       | 0.40       | 0.18       | 0.95       | 2.45       | 0.19       |
| 20-O-Corrin         | 2.20       | 0.72       | 1.30       | 1.33       | 0.40       | 2.10       | 0.42       | 0.37       | 0.95       | 0.70       | 1.90       | 0.93       |
| 20-O-PFPh-Corrin    | 2.07       | 1.37       | 0.56       | 1.21       | 1.08       | 0.56       | 0.78       | 1.06       | 0.58       | 0.32       | 0.51       | 0.58       |
| 21-O-Corrin         | 1.85       | 0.23       | 0.28       | 1.09       | 0.30       | 0.29       | 0.12       | 0.28       | 0.18       | 0.15       | 0.29       | 0.18       |
| 21-O-PFPh-Corrin    | 3.00       | 0.25       | 0.87       | 1.75       | 0.20       | 1.08       | 0.14       | 0.20       | 0.39       | 0.45       | 1.06       | 0.41       |
| N1-Con-Corrin       | 1.87       | 2.18       | 1.38       | 1.11       | 2.17       | 1.40       | 1.27       | 2.04       | 0.43       | 0.79       | 1.08       | 0.42       |
| N1-Con-PFPh-Corrin  | 2.88       | 2.43       | 2.86       | 1.70       | 3.23       | 2.62       | 1.40       | 3.09       | 0.81       | 1.69       | 2.37       | 0.68       |
| N2-Con-Corrin       | 2.21       | 0.69       | 0.78       | 1.35       | 0.30       | 0.72       | 0.40       | 0.27       | 1.05       | 0.45       | 0.72       | 1.05       |
| N2-Con-PFPh-Corrin  | 2.95       | 0.60       | 0.70       | 1.78       | 0.31       | 0.76       | 0.34       | 0.27       | 1.56       | 0.41       | 0.81       | 1.56       |
| Neo-Con-Corrin      | 0.45       | 2.16       | 1.11       | 0.25       | 0.22       | 0.32       | 1.31       | 0.18       | 0.42       | 0.66       | 0.31       | 0.40       |
| Neo-Con-PFPh-Corrin | 0.51       | 2.97       | 0.78       | 0.29       | 0.24       | 0.23       | 1.79       | 0.24       | 0.51       | 0.45       | 0.22       | 0.48       |

**5. NTOs for  $S_0 \rightarrow S_1$  and  $S_0 \rightarrow S_2$  transitions :**

The following figures presents the NTOs for  $S_0 \rightarrow S_1$  and  $S_0 \rightarrow S_2$  transitions of all considered heterocorrins and heterocorrins that were computed at RICC2/cc-pVDZ level of theory.

**SF5a** : NTOs of 10-NH-, 10-NMe-, 10-O- Corroles and their PFPh-substituted systems.

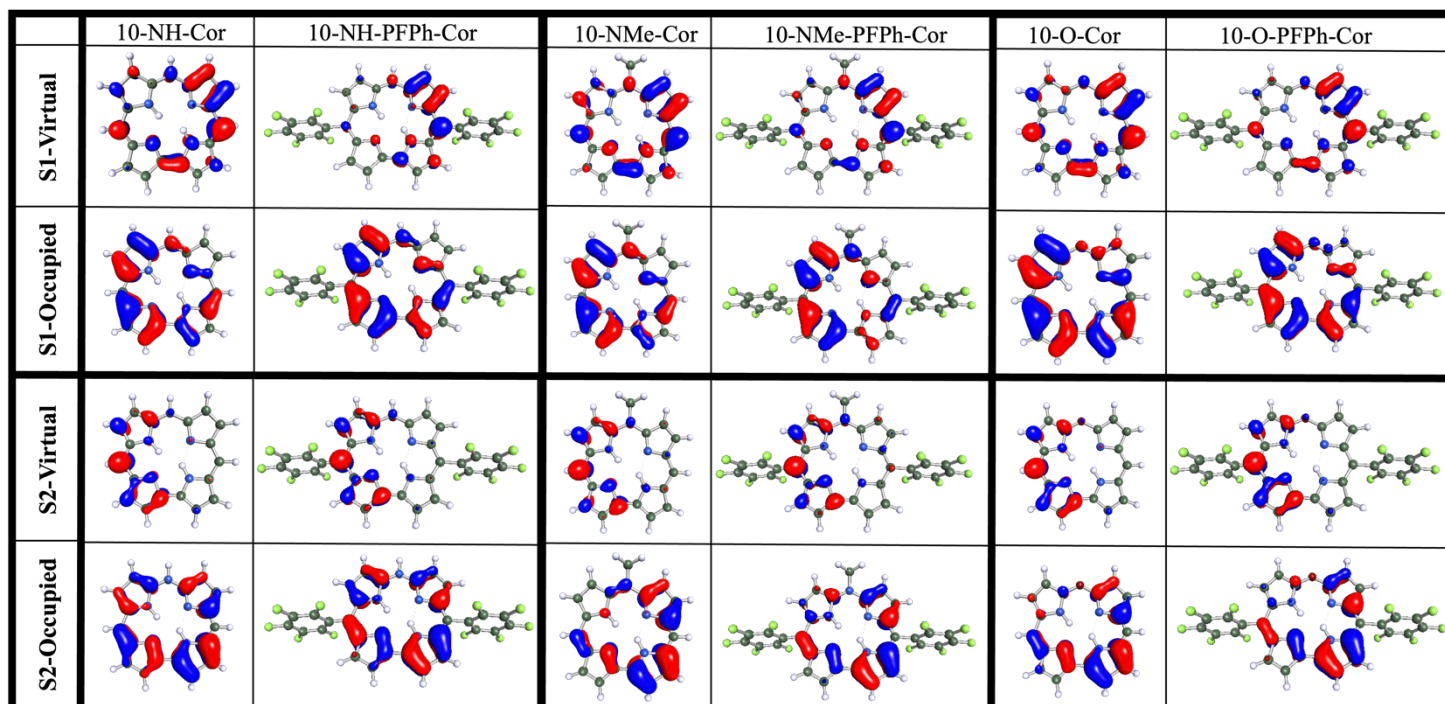

**SF5b** : NTOs of 10-S-, 10-Se-, 10-SiMe2- Corroles and their PFPh-substituted systems.

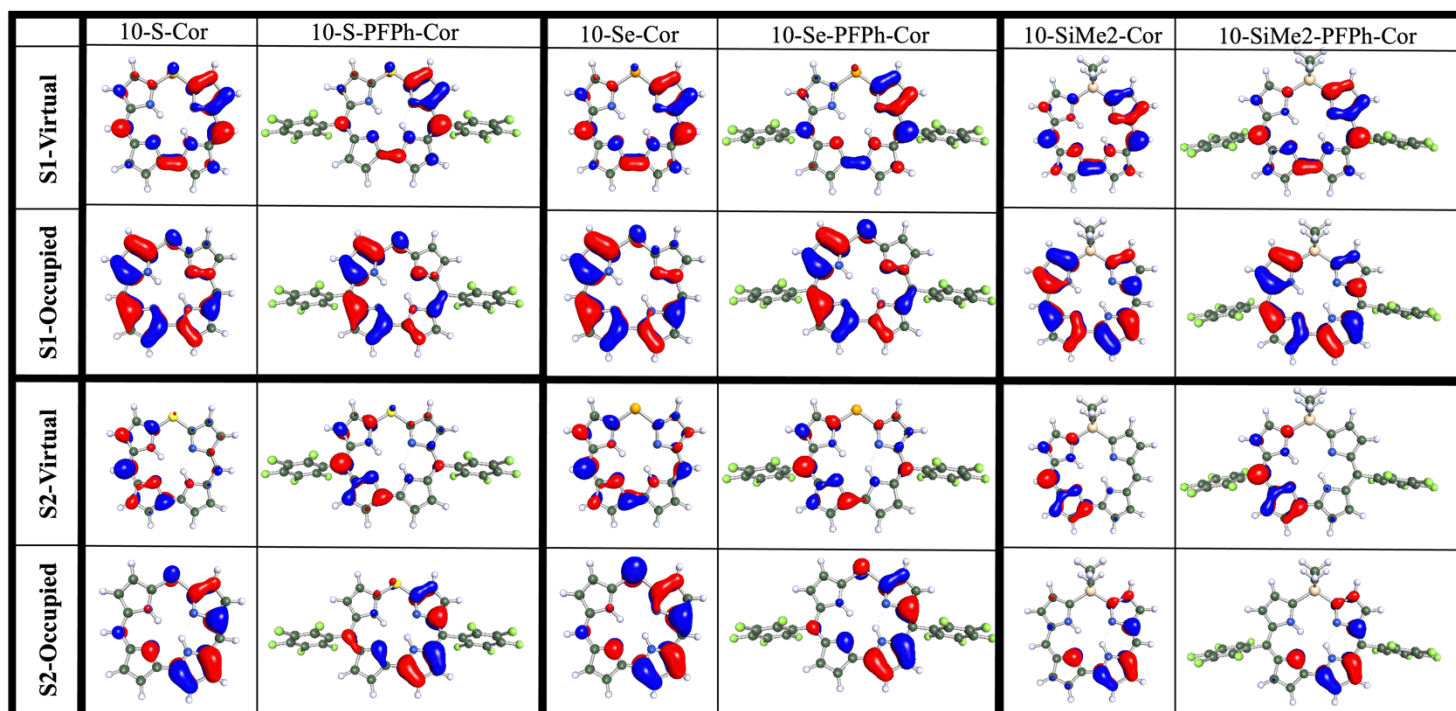



SF5c : NTOs of 20-O-, 21-O-, 21-S- Corroles and their PFPh-substituted systems

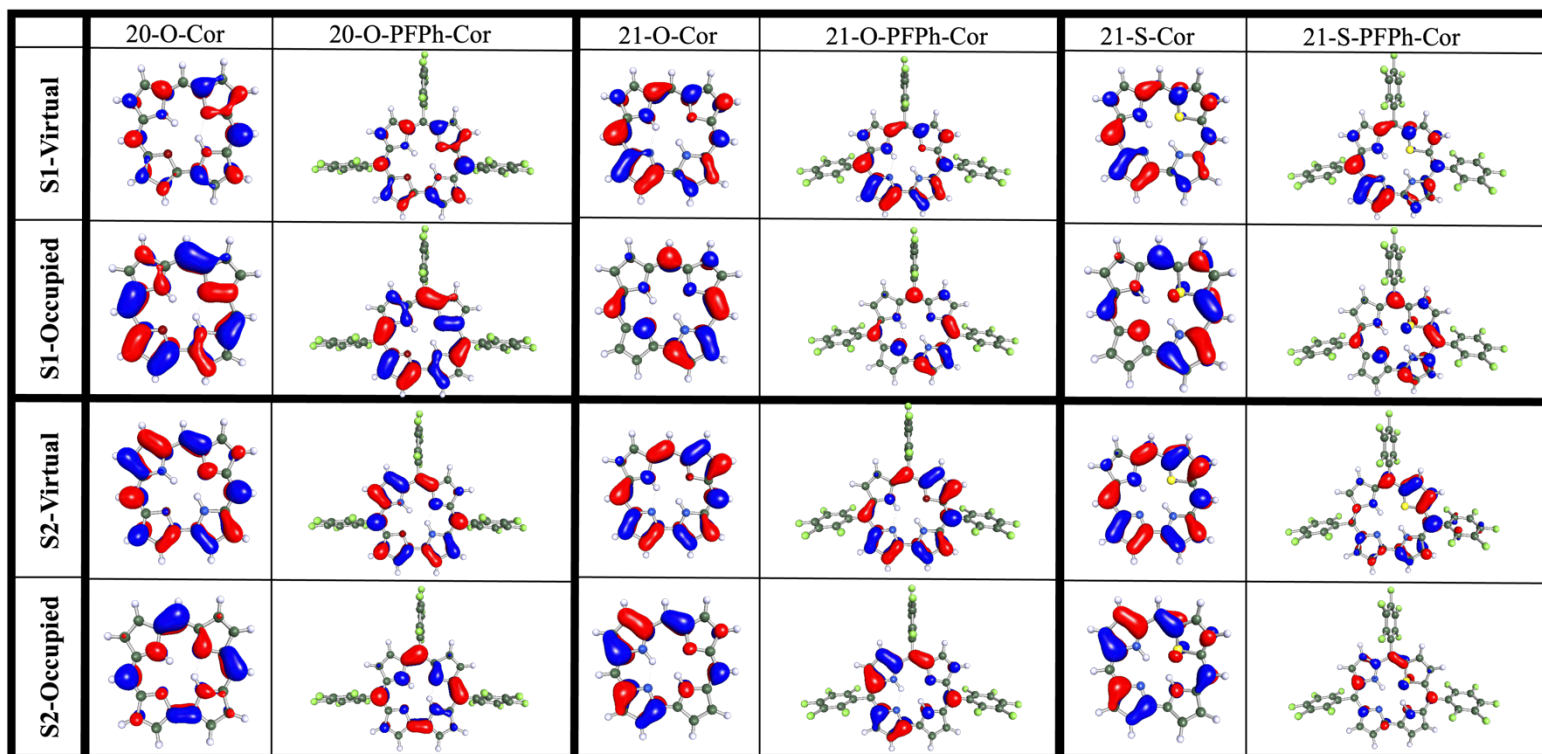

SF5d : NTOs of N1-Con-, N2-Con-, Neo-Con- Corroles and their PFPh-substituted systems

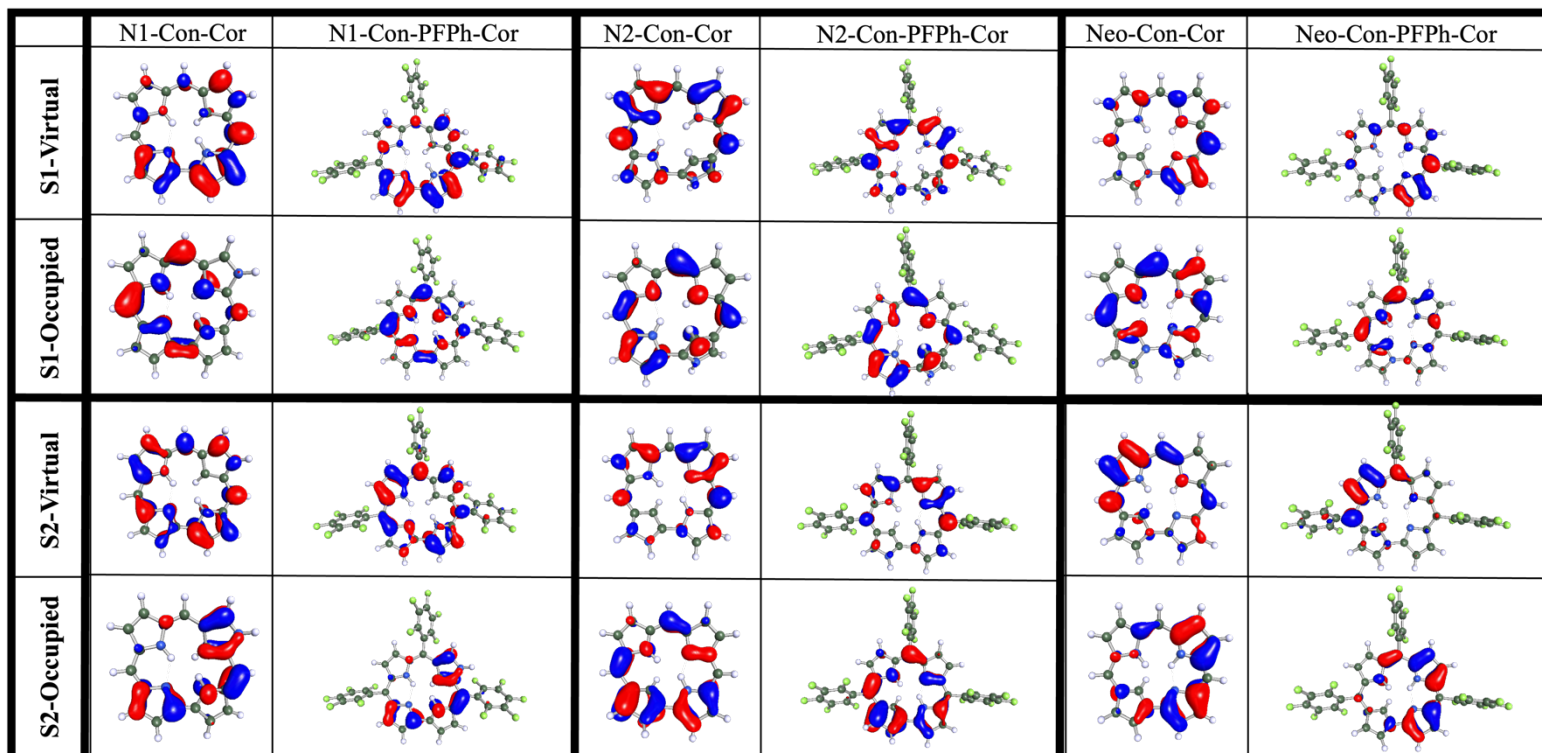

SF5e : NTOs of 10-NH-, 10-NMe-, 10-O- Corrins and their PFPh-substituted systems

|             | 10-NH-Corrin | 10-NH-PFPh-Corrin | 10-NMe-Corrin | 10-NMe-PFPh-Corrin | 10-O-Corrin | 10-O-PFPh-Corrin |
|-------------|--------------|-------------------|---------------|--------------------|-------------|------------------|
| S1-Virtual  |              |                   |               |                    |             |                  |
| S1-Occupied |              |                   |               |                    |             |                  |
| S2-Virtual  |              |                   |               |                    |             |                  |
| S2-Occupied |              |                   |               |                    |             |                  |

SF5f : NTOs of 10-S-, 10-Se-, 10-SiMe2- Corrins and their PFPh-substituted systems

|             | 10-S-Corrin | 10-S-PFPh-Corrin | 10-Se-Corrin | 10-Se-PFPh-Corrin | 10-SiMe2-Corrin | 10-SiMe2-PFPh-Corrin |
|-------------|-------------|------------------|--------------|-------------------|-----------------|----------------------|
| S1-Virtual  |             |                  |              |                   |                 |                      |
| S1-Occupied |             |                  |              |                   |                 |                      |
| S2-Virtual  |             |                  |              |                   |                 |                      |
| S2-Occupied |             |                  |              |                   |                 |                      |

**SF5g** : NTOs of 20-O-, 21-O-, 21-S- Corrins and their PFPh-substituted systems

|             | 20-O-Corrin | 20-O-PFPh-Corrin | 21-O-Corrin | 21-OPFPh-Corrin | 21-S-Corrin | 21-S-PFPh-Corrin |
|-------------|-------------|------------------|-------------|-----------------|-------------|------------------|
| S1-Virtual  |             |                  |             |                 |             |                  |
| S1-Occupied |             |                  |             |                 |             |                  |
| S2-Virtual  |             |                  |             |                 |             |                  |
| S2-Occupied |             |                  |             |                 |             |                  |

**SF5h** : NTOs of N1-Con-, N2-Con-, Neo-Con- Corrins and their PFPh-substituted systems

|             | N1-Con-Corrin | N1-Con-PFPh-Corrin | N2-Con-Corrin | N2-Con-PFPh-Corrin | Neo-Con-Corrin | Neo-Con-PFPh-Corrin |
|-------------|---------------|--------------------|---------------|--------------------|----------------|---------------------|
| S1-Virtual  |               |                    |               |                    |                |                     |
| S1-Occupied |               |                    |               |                    |                |                     |
| S2-Virtual  |               |                    |               |                    |                |                     |
| S2-Occupied |               |                    |               |                    |                |                     |

**6. Effect of basis set on magnitudes of different dipole moments and transition dipole moments :**

**ST6 :** Dipole strengths of Pristine Corrole corresponding to  $S_0 \rightarrow S_1$  and  $S_0 \rightarrow S_2$  transitions calculated using aug-cc-pVTZ, cc-pVTZ and cc-pVDZ basis sets at RI-CC2 level of theory.

| $\mu$      | aug-cc-pVTZ | cc-pVTZ | cc-pVDZ |
|------------|-------------|---------|---------|
| $\mu_{00}$ | 0.7492      | 0.7268  | 0.6976  |
| $\mu_{11}$ | 0.6557      | 0.6488  | 0.6546  |
| $\mu_{22}$ | 0.9119      | 0.8949  | 0.8758  |
| $\mu_{01}$ | 0.9986      | 1.0055  | 1.0482  |
| $\mu_{02}$ | 1.6567      | 1.6453  | 1.6761  |
| $\mu_{10}$ | 0.7943      | 0.7943  | 0.7983  |
| $\mu_{20}$ | 1.1928      | 1.1830  | 1.1861  |
| $\mu_{12}$ | 0.3651      | 0.3730  | 0.3940  |
| $\mu_{21}$ | 0.2583      | 0.2646  | 2843    |

**7. Effect of different *meso*-substituents on OPA, TPA, excitation energies and MOs:**

**ST7 :** Dipole strengths of Pristine Corrole calculated using aug-cc-pVTZ, cc-pVTZ and cc-pVDZ basis sets at RI-CC2 level of theory.

| System                            | S1-OPA | S2-OPA | S1-TPA | S2-TPA | S1-Ex. Ene (eV) | S2-Ex. Ene (eV) |
|-----------------------------------|--------|--------|--------|--------|-----------------|-----------------|
| 10-SiMe <sub>2</sub> -Cor         | 0.1354 | 0.0124 | 2301   | 36155  | 2.21            | 3.17            |
| 10-SiMe <sub>2</sub> -PFPh-Cor    | 0.2008 | 0.0231 | 3401   | 86031  | 2.07            | 2.92            |
| 10-SiMe <sub>2</sub> -Tolyl-Cor   | 0.2226 | 0.0225 | 3509   | 106324 | 2.09            | 2.98            |
| 10-SiMe <sub>2</sub> -OMe-Cor     | 0.1243 | 0.3631 | 1550   | 12309  | 2.50            | 3.48            |
| 10-SiMe <sub>2</sub> -TFMe-Cor    | 0.1547 | 0.0301 | 3017   | 56337  | 2.01            | 2.90            |
| 10-SiMe <sub>2</sub> -Phenyl-Cor  | 0.2105 | 0.0215 | 3250   | 97748  | 2.10            | 2.98            |
| 10-SiMe <sub>2</sub> -Ethenyl-Cor | 0.1777 | 0.0181 | 3406   | 72295  | 2.09            | 2.98            |
| 10-SiMe <sub>2</sub> -Me-Cor      | 0.1499 | 0.0200 | 2954   | 43431  | 2.25            | 3.19            |

**SF7** : HOMO and LUMOs of 10-SiMe<sub>2</sub>-Phenyl-Cor, 10-SiMe<sub>2</sub>-Tolyl-Cor and 10-SiMe<sub>2</sub>-PFPh-Cor systems indicating the electron densities.

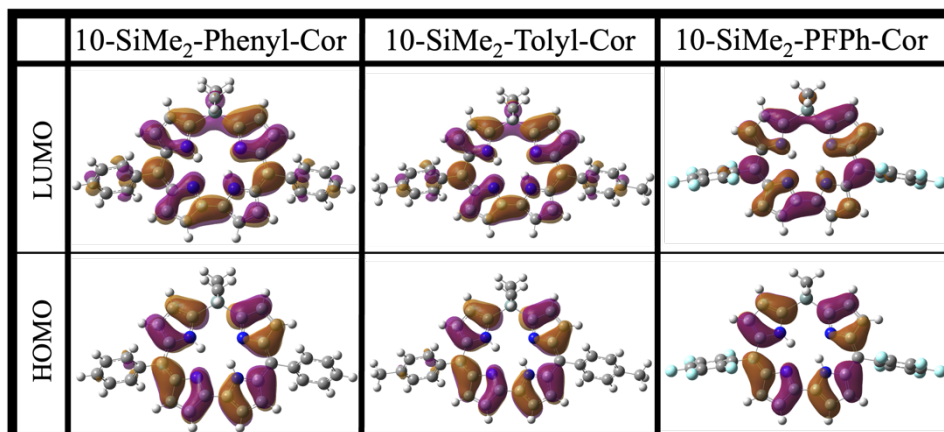

## 8. Optimized Coordinates of the ground-state geometry :

This section includes the ground-state optimized cartesian coordinates for all the systems considered in this work that are optimized at B3LYP/6-311+G(d,p) level of theory using Gaussian-16 program.

### Coordinates of Heterocorroles (XYZ Format):

36

10-NH-Cor

```

C      2.699241  0.978068  0.000057
N      1.947097 -0.137941  0.000099
C      4.062839  0.586817 -0.000068
C      4.085170 -0.803799 -0.000100
C      2.747062 -1.273522  0.000008
C      0.872823  2.674596  0.000026
N     -0.162903  1.852391  0.000133
C     -1.302450  2.658418 -0.000001
C     -0.893936  4.046004 -0.000198
C      0.474453  4.064885 -0.000172
C     -2.610813  2.172631 -0.000029
C     -2.943578  0.798624  0.000108
C     -4.141492  0.025748 -0.000097
C     -3.778641 -1.323940 -0.000150
C     -2.358488 -1.388104  0.000174
C     -1.292980 -2.358529  0.000119
N     -0.063948 -1.831692  0.000225
C      0.840168 -2.855075  0.000015
C      0.120785 -4.114686 -0.000204
C     -1.217795 -3.802591 -0.000149
C      2.210382 -2.574799 -0.000035
H      1.128207  4.925545 -0.000297

```

|   |           |           |           |
|---|-----------|-----------|-----------|
| H | -1.558547 | 4.898131  | -0.000354 |
| H | -3.416430 | 2.897741  | -0.000231 |
| H | -5.146665 | 0.419766  | -0.000266 |
| H | -4.450072 | -2.168543 | -0.000367 |
| H | -2.049519 | -4.491921 | -0.000295 |
| H | 0.559296  | -5.102694 | -0.000394 |
| H | 2.917081  | -3.397207 | -0.000140 |
| H | 4.963847  | -1.430753 | -0.000123 |
| H | 4.909894  | 1.255691  | -0.000188 |
| H | 2.881788  | 2.985310  | 0.000064  |
| N | -1.930991 | -0.107122 | 0.000326  |
| H | -0.960097 | 0.191054  | 0.000390  |
| N | 2.189812  | 2.251398  | 0.000117  |
| H | 0.931227  | -0.235836 | 0.000088  |

56

10-NH-PFPh-Cor

|   |           |           |           |
|---|-----------|-----------|-----------|
| C | -1.227162 | 2.796895  | -0.623917 |
| N | -1.488168 | 1.506567  | -0.342537 |
| C | -2.465125 | 3.474136  | -0.769143 |
| C | -3.466891 | 2.534936  | -0.565700 |
| C | -2.856716 | 1.281781  | -0.295363 |
| C | 1.264607  | 2.720111  | -0.619677 |
| N | 1.434239  | 1.434160  | -0.358675 |
| C | 2.811188  | 1.224241  | -0.306765 |
| C | 3.486581  | 2.480557  | -0.562112 |
| C | 2.519480  | 3.425115  | -0.759315 |
| C | 3.404627  | -0.020820 | -0.048202 |
| C | 2.650764  | -1.203978 | 0.169545  |
| C | 2.948614  | -2.553017 | 0.526928  |
| C | 1.738951  | -3.233766 | 0.661458  |
| C | 0.692830  | -2.310113 | 0.388878  |
| C | -0.742072 | -2.250418 | 0.390373  |
| N | -1.254349 | -1.043241 | 0.123665  |
| C | -2.613437 | -1.136206 | 0.182514  |
| C | -2.977688 | -2.504700 | 0.506129  |
| C | -1.803226 | -3.201677 | 0.637149  |
| C | -3.405423 | 0.005427  | -0.029754 |
| H | 2.651828  | 4.476240  | -0.972299 |
| H | 4.554739  | 2.633901  | -0.592278 |
| H | 3.934662  | -2.965719 | 0.674736  |
| H | 1.613247  | -4.270436 | 0.932306  |
| H | -1.688595 | -4.248766 | 0.875623  |
| H | -3.978263 | -2.894035 | 0.624453  |
| H | -4.529100 | 2.717792  | -0.606903 |
| H | -2.587549 | 4.522239  | -0.995398 |
| H | 0.054117  | 4.314032  | -0.946897 |
| N | 1.297715  | -1.139086 | 0.088873  |
| H | 0.828536  | -0.260324 | -0.114243 |
| N | 0.030757  | 3.325975  | -0.742491 |

|   |           |           |           |
|---|-----------|-----------|-----------|
| H | -0.848606 | 0.723561  | -0.188703 |
| C | 4.891632  | -0.120638 | 0.020158  |
| C | 5.629269  | -0.713002 | -1.006701 |
| C | 5.610072  | 0.352493  | 1.119768  |
| C | 7.013397  | -0.827523 | -0.951784 |
| C | 6.994277  | 0.250080  | 1.197538  |
| C | 7.697911  | -0.342940 | 0.156329  |
| C | -4.891400 | -0.114884 | 0.028558  |
| C | -5.621257 | 0.350939  | 1.123715  |
| C | -5.616875 | -0.708028 | -1.006301 |
| C | -7.004522 | 0.234426  | 1.193637  |
| C | -7.000323 | -0.836421 | -0.959176 |
| C | -7.695984 | -0.362962 | 0.146629  |
| F | 4.966813  | 0.916116  | 2.150209  |
| F | 7.651171  | 0.710518  | 2.266804  |
| F | 9.026173  | -0.446439 | 0.220059  |
| F | 7.689839  | -1.391932 | -1.956925 |
| F | 5.005729  | -1.178320 | -2.096519 |
| F | -4.988498 | 0.919640  | 2.158206  |
| F | -7.672135 | 0.685207  | 2.260379  |
| F | -9.023479 | -0.480236 | 0.202520  |
| F | -7.665417 | -1.404096 | -1.970017 |
| F | -4.983860 | -1.161500 | -2.095226 |

39

10-NMe-PFPh-Cor

|   |           |           |           |
|---|-----------|-----------|-----------|
| C | 2.410069  | -1.172138 | -0.015399 |
| N | 1.083326  | -1.431879 | -0.016592 |
| C | 3.086411  | -2.423198 | 0.046226  |
| C | 2.115243  | -3.415572 | 0.077621  |
| C | 0.842767  | -2.799613 | 0.035318  |
| C | 2.282841  | 1.300805  | -0.018734 |
| N | 0.958482  | 1.410576  | -0.056717 |
| C | 0.673539  | 2.775695  | 0.016059  |
| C | 1.910183  | 3.511196  | 0.104129  |
| C | 2.926663  | 2.598489  | 0.083778  |
| C | -0.602608 | 3.341893  | 0.020337  |
| C | -1.803406 | 2.603522  | -0.033613 |
| C | -3.196733 | 2.888159  | 0.058245  |
| C | -3.882041 | 1.670295  | 0.038492  |
| C | -2.915024 | 0.634481  | -0.067204 |
| C | -2.824584 | -0.803135 | -0.051073 |
| N | -1.573362 | -1.272068 | -0.065380 |
| C | -1.629838 | -2.633288 | -0.003099 |
| C | -3.019966 | -3.046309 | 0.040915  |
| C | -3.770428 | -1.895359 | 0.013492  |
| C | -0.444473 | -3.368925 | 0.041400  |
| H | 3.980354  | 2.811462  | 0.160141  |
| H | 2.000701  | 4.585319  | 0.181508  |
| H | -0.665150 | 4.421595  | 0.092773  |

|   |           |           |           |
|---|-----------|-----------|-----------|
| H | -3.635833 | 3.870801  | 0.142907  |
| H | -4.950247 | 1.533760  | 0.104984  |
| H | -4.847569 | -1.816338 | 0.036110  |
| H | -3.385910 | -4.062132 | 0.092286  |
| H | -0.494793 | -4.451000 | 0.092963  |
| H | 2.288719  | -4.479695 | 0.130168  |
| H | 4.151359  | -2.575436 | 0.085298  |
| N | -1.715435 | 1.252035  | -0.129794 |
| H | -0.818522 | 0.779409  | -0.164723 |
| N | 2.968475  | 0.087816  | -0.064301 |
| H | 0.312432  | -0.770485 | -0.050549 |
| C | 4.437968  | 0.132603  | -0.092326 |
| H | 4.763433  | 1.049841  | -0.572131 |
| H | 4.857984  | 0.078009  | 0.915938  |
| H | 4.813146  | -0.698080 | -0.685577 |

---

59

10-NMe-PFPh-Cor

|   |           |           |           |
|---|-----------|-----------|-----------|
| C | -1.218301 | 2.731189  | -0.371585 |
| N | -1.462966 | 1.419459  | -0.148755 |
| C | -2.477244 | 3.373319  | -0.543288 |
| C | -3.457812 | 2.402520  | -0.412917 |
| C | -2.827324 | 1.160154  | -0.160961 |
| C | 1.258206  | 2.659964  | -0.366151 |
| N | 1.408275  | 1.355909  | -0.149717 |
| C | 2.781310  | 1.108474  | -0.163036 |
| C | 3.480418  | 2.346560  | -0.414854 |
| C | 2.537872  | 3.323576  | -0.543486 |
| C | 3.379902  | -0.147044 | 0.029599  |
| C | 2.639840  | -1.338191 | 0.228993  |
| C | 2.947658  | -2.710967 | 0.466205  |
| C | 1.741415  | -3.400762 | 0.585625  |
| C | 0.689627  | -2.458137 | 0.424635  |
| C | -0.744743 | -2.400687 | 0.422350  |
| N | -1.248629 | -1.177400 | 0.227935  |
| C | -2.606646 | -1.275822 | 0.231894  |
| C | -2.981350 | -2.662298 | 0.452680  |
| C | -1.810698 | -3.367294 | 0.571624  |
| C | -3.384188 | -0.125175 | 0.037053  |
| H | 2.723030  | 4.362731  | -0.759238 |
| H | 4.549638  | 2.469803  | -0.496978 |
| H | 3.937377  | -3.134566 | 0.539867  |
| H | 1.621784  | -4.457191 | 0.768496  |
| H | -1.701315 | -4.428575 | 0.739469  |
| H | -3.984848 | -3.057843 | 0.510125  |
| H | -4.521626 | 2.558915  | -0.497020 |
| H | -2.643443 | 4.414565  | -0.758872 |
| N | 1.286488  | -1.264049 | 0.215119  |
| H | 0.807796  | -0.379453 | 0.075187  |
| N | 0.030483  | 3.311920  | -0.418741 |



|   |           |           |           |
|---|-----------|-----------|-----------|
| H | -0.801730 | 0.660577  | 0.001722  |
| C | 0.043465  | 4.772580  | -0.611483 |
| H | 0.945376  | 5.187926  | -0.174939 |
| H | -0.004949 | 5.032031  | -1.672183 |
| H | -0.802782 | 5.212226  | -0.090285 |
| C | 4.869113  | -0.249883 | 0.026755  |
| C | 5.561244  | -0.771842 | -1.067381 |
| C | 5.633697  | 0.147712  | 1.124851  |
| C | 6.946219  | -0.890042 | -1.078091 |
| C | 7.019624  | 0.040032  | 1.138031  |
| C | 7.677547  | -0.481500 | 0.030726  |
| C | -4.872188 | -0.243476 | 0.029694  |
| C | -5.557306 | -0.767947 | -1.067543 |
| C | -5.642949 | 0.152914  | 1.123914  |
| C | -6.941561 | -0.896333 | -1.081289 |
| C | -7.027858 | 0.035001  | 1.133868  |
| C | -7.678781 | -0.492878 | 0.025313  |
| F | 7.721959  | 0.428086  | 2.207247  |
| F | 9.007103  | -0.589361 | 0.031979  |
| F | 7.578683  | -1.386102 | -2.146121 |
| F | 4.891246  | -1.163490 | -2.158665 |
| F | 5.034955  | 0.642852  | 2.215455  |
| F | -4.882831 | -1.153311 | -2.157864 |
| F | -7.567680 | -1.397534 | -2.150638 |
| F | -9.007546 | -0.610753 | 0.023243  |
| F | -7.735923 | 0.418905  | 2.200820  |
| F | -5.049869 | 0.654670  | 2.214910  |

35

10-O-Cor

|   |           |           |           |
|---|-----------|-----------|-----------|
| C | 2.843196  | 0.029991  | 0.000007  |
| N | 1.762245  | -0.765324 | -0.000253 |
| C | 4.001191  | -0.772695 | 0.000465  |
| C | 3.564214  | -2.096425 | 0.000462  |
| C | 2.147165  | -2.100506 | 0.000108  |
| C | 1.737244  | 2.177200  | -0.000284 |
| N | 0.494641  | 1.760556  | -0.000193 |
| C | -0.292808 | 2.922020  | 0.000016  |
| C | 0.581069  | 4.075585  | 0.000088  |
| C | 1.868841  | 3.609832  | -0.000209 |
| C | -1.685354 | 2.922118  | 0.000226  |
| C | -2.484310 | 1.752861  | 0.000254  |
| C | -3.875059 | 1.447245  | 0.000251  |
| C | -4.005959 | 0.053682  | 0.000124  |
| C | -2.698091 | -0.500312 | 0.000062  |
| C | -2.023056 | -1.779793 | -0.000359 |
| N | -0.691337 | -1.694700 | -0.000583 |
| C | -0.178671 | -2.962244 | -0.000292 |
| C | -1.278185 | -3.908147 | 0.000024  |
| C | -2.435373 | -3.166145 | 0.000011  |

|   |           |           |           |
|---|-----------|-----------|-----------|
| C | 1.205362  | -3.150124 | 0.000058  |
| H | 2.793556  | 4.165240  | -0.000289 |
| H | 0.258745  | 5.107059  | 0.000273  |
| H | -2.184507 | 3.884562  | 0.000331  |
| H | -4.680360 | 2.166258  | 0.000285  |
| H | -4.930280 | -0.502752 | 0.000088  |
| H | -3.449559 | -3.537799 | 0.000297  |
| H | -1.195913 | -4.985874 | 0.000270  |
| H | 1.599356  | -4.160541 | 0.000277  |
| H | 4.188124  | -2.977270 | 0.000813  |
| H | 5.013922  | -0.404107 | 0.000807  |
| N | -1.853029 | 0.550870  | 0.000132  |
| H | -0.841144 | 0.486681  | -0.000024 |
| H | 0.770374  | -0.526903 | -0.000627 |
| O | 2.840193  | 1.375100  | -0.000288 |

---

55

10-O-PFPh-Cor

|   |           |           |           |
|---|-----------|-----------|-----------|
| C | -1.186801 | 2.755207  | -0.641640 |
| N | -1.450658 | 1.473175  | -0.344249 |
| C | -2.402028 | 3.449894  | -0.800672 |
| C | -3.417261 | 2.522044  | -0.589160 |
| C | -2.823272 | 1.266137  | -0.303111 |
| C | 1.227520  | 2.675680  | -0.643438 |
| N | 1.393917  | 1.398419  | -0.400070 |
| C | 2.781302  | 1.204390  | -0.342498 |
| C | 3.439237  | 2.473921  | -0.581325 |
| C | 2.459498  | 3.407823  | -0.772214 |
| C | 3.383088  | -0.032334 | -0.084039 |
| C | 2.645279  | -1.230609 | 0.122646  |
| C | 2.952888  | -2.556127 | 0.545069  |
| C | 1.747713  | -3.248427 | 0.683784  |
| C | 0.698289  | -2.352881 | 0.347611  |
| C | -0.741795 | -2.287440 | 0.363370  |
| N | -1.244531 | -1.080484 | 0.093128  |
| C | -2.605949 | -1.157691 | 0.170282  |
| C | -2.978249 | -2.519917 | 0.509424  |
| C | -1.808597 | -3.226620 | 0.632882  |
| C | -3.383456 | -0.007413 | -0.033841 |
| H | 2.556418  | 4.463441  | -0.971242 |
| H | 4.505529  | 2.640665  | -0.604475 |
| H | 3.939965  | -2.945701 | 0.740683  |
| H | 1.629560  | -4.271100 | 1.005959  |
| H | -1.700855 | -4.272825 | 0.877937  |
| H | -3.980656 | -2.898971 | 0.643803  |
| H | -4.477252 | 2.715704  | -0.638024 |
| H | -2.494611 | 4.496569  | -1.039800 |
| N | 1.294935  | -1.193651 | -0.005265 |
| H | 0.812012  | -0.331626 | -0.235518 |
| H | -0.820847 | 0.684214  | -0.184697 |

|   |           |           |           |
|---|-----------|-----------|-----------|
| O | 0.030399  | 3.308826  | -0.769161 |
| C | -4.870501 | -0.109512 | 0.034535  |
| C | -5.608555 | -0.701897 | -0.991639 |
| C | -5.586902 | 0.375783  | 1.130039  |
| C | -6.993273 | -0.811161 | -0.935709 |
| C | -6.971018 | 0.277215  | 1.208837  |
| C | -7.676080 | -0.319372 | 0.170251  |
| C | 4.870393  | -0.111502 | 0.010978  |
| C | 5.631447  | -0.695116 | -1.003464 |
| C | 5.562497  | 0.370862  | 1.123124  |
| C | 7.015702  | -0.791587 | -0.925244 |
| C | 6.946314  | 0.284804  | 1.224510  |
| C | 7.674734  | -0.298780 | 0.194881  |
| F | 7.578664  | 0.751877  | 2.304829  |
| F | 9.002245  | -0.385869 | 0.281330  |
| F | 7.715802  | -1.347058 | -1.918280 |
| F | 5.030651  | -1.168204 | -2.102353 |
| F | 4.893759  | 0.924676  | 2.142038  |
| F | -7.671140 | -1.378225 | -1.937700 |
| F | -4.986865 | -1.172681 | -2.079552 |
| F | -9.004050 | -0.419156 | 0.234787  |
| F | -7.626127 | 0.744287  | 2.275583  |
| F | -4.939728 | 0.943082  | 2.155814  |

35

10-S-Cor

|   |           |           |           |
|---|-----------|-----------|-----------|
| C | 2.565240  | -1.274178 | 0.000129  |
| N | 1.237427  | -1.517306 | -0.000147 |
| C | 3.240342  | -2.516427 | 0.000108  |
| C | 2.266438  | -3.508873 | -0.000162 |
| C | 0.997012  | -2.885794 | -0.000313 |
| C | 2.289743  | 1.610331  | 0.000064  |
| N | 0.970212  | 1.596172  | 0.000326  |
| C | 0.580227  | 2.943365  | -0.000011 |
| C | 1.757101  | 3.779937  | -0.000474 |
| C | 2.841654  | 2.949101  | -0.000394 |
| C | -0.738911 | 3.389042  | -0.000014 |
| C | -1.870218 | 2.547104  | 0.000293  |
| C | -3.279811 | 2.743521  | -0.000194 |
| C | -3.884440 | 1.484814  | -0.000185 |
| C | -2.849366 | 0.513788  | 0.000250  |
| C | -2.701065 | -0.917242 | 0.000375  |
| N | -1.440824 | -1.355848 | 0.000848  |
| C | -1.477421 | -2.723220 | 0.000278  |
| C | -2.860814 | -3.162803 | -0.000543 |
| C | -3.630033 | -2.027569 | -0.000448 |
| C | -0.293704 | -3.453445 | -0.000070 |
| H | 3.888742  | 3.212175  | -0.000726 |
| H | 1.760195  | 4.860560  | -0.000833 |
| H | -0.902145 | 4.460813  | -0.000461 |

|   |           |           |           |
|---|-----------|-----------|-----------|
| H | -3.781783 | 3.699250  | -0.000690 |
| H | -4.943466 | 1.279074  | -0.000797 |
| H | -4.708368 | -1.965464 | -0.001033 |
| H | -3.205936 | -4.187010 | -0.001123 |
| H | -0.344023 | -4.536743 | -0.000189 |
| H | 2.433911  | -4.575229 | -0.000507 |
| H | 4.311029  | -2.645961 | 0.000189  |
| N | -1.685508 | 1.199711  | 0.000621  |
| H | -0.757202 | 0.787762  | 0.000852  |
| H | 0.462980  | -0.856099 | 0.000432  |
| S | 3.406568  | 0.253691  | 0.000076  |

---

35

10-Se-Cor

|    |           |           |           |
|----|-----------|-----------|-----------|
| C  | 2.142184  | -1.530540 | 0.000124  |
| N  | 0.798689  | -1.661031 | -0.000190 |
| C  | 2.710766  | -2.822177 | 0.000532  |
| C  | 1.657108  | -3.732034 | 0.000382  |
| C  | 0.445640  | -3.005500 | -0.000022 |
| C  | 2.038308  | 1.561536  | -0.000088 |
| N  | 0.722296  | 1.598116  | 0.000056  |
| C  | 0.386608  | 2.961615  | 0.000110  |
| C  | 1.595325  | 3.750718  | 0.000108  |
| C  | 2.645257  | 2.875508  | -0.000072 |
| C  | -0.913182 | 3.456085  | 0.000174  |
| C  | -2.077142 | 2.660376  | 0.000136  |
| C  | -3.473807 | 2.926779  | 0.000144  |
| C  | -4.140383 | 1.699958  | 0.000012  |
| C  | -3.155352 | 0.679918  | -0.000033 |
| C  | -3.095991 | -0.757050 | -0.000019 |
| N  | -1.870404 | -1.282956 | -0.000065 |
| C  | -2.008603 | -2.645889 | -0.000063 |
| C  | -3.419819 | -2.983864 | -0.000235 |
| C  | -4.103978 | -1.796236 | -0.000048 |
| C  | -0.887399 | -3.466077 | -0.000004 |
| H  | 3.701997  | 3.097614  | -0.000163 |
| H  | 1.641509  | 4.830405  | 0.000183  |
| H  | -1.036538 | 4.533303  | 0.000211  |
| H  | -3.926426 | 3.906832  | 0.000154  |
| H  | -5.208156 | 1.546147  | -0.000176 |
| H  | -5.174759 | -1.654627 | -0.000084 |
| H  | -3.837456 | -3.980683 | -0.000363 |
| H  | -1.024934 | -4.541866 | 0.000026  |
| H  | 1.734625  | -4.808735 | 0.000462  |
| H  | 3.766576  | -3.043054 | 0.000915  |
| N  | -1.956620 | 1.304082  | 0.000013  |
| H  | -1.048817 | 0.847446  | 0.000108  |
| H  | 0.079618  | -0.939486 | -0.000371 |
| Se | 3.188288  | 0.044132  | -0.000189 |

---

55

10-Se-PFPh-Cor

|    |           |           |           |
|----|-----------|-----------|-----------|
| C  | -1.534733 | 2.748921  | -0.231829 |
| N  | -1.676518 | 1.411866  | -0.115341 |
| C  | -2.821750 | 3.326383  | -0.288413 |
| C  | -3.740140 | 2.286689  | -0.203479 |
| C  | -3.023393 | 1.072370  | -0.094084 |
| C  | 1.560327  | 2.661103  | -0.226591 |
| N  | 1.618362  | 1.350172  | -0.118866 |
| C  | 2.985391  | 1.035677  | -0.094623 |
| C  | 3.756651  | 2.254345  | -0.197599 |
| C  | 2.865817  | 3.285002  | -0.280757 |
| C  | 3.488826  | -0.264210 | 0.008080  |
| C  | 2.670386  | -1.417295 | 0.090368  |
| C  | 2.928812  | -2.810479 | 0.225885  |
| C  | 1.700349  | -3.466004 | 0.274841  |
| C  | 0.686742  | -2.479417 | 0.170770  |
| C  | -0.746008 | -2.427681 | 0.169181  |
| N  | -1.289179 | -1.213356 | 0.064120  |
| C  | -2.648590 | -1.370749 | 0.090786  |
| C  | -2.966082 | -2.782929 | 0.220493  |
| C  | -1.770360 | -3.446147 | 0.269467  |
| C  | -3.492255 | -0.261144 | 0.011938  |
| H  | 3.073360  | 4.340922  | -0.368933 |
| H  | 4.833711  | 2.326052  | -0.208637 |
| H  | 3.904057  | -3.268485 | 0.282317  |
| H  | 1.540011  | -4.527898 | 0.375779  |
| H  | -1.613442 | -4.510389 | 0.363923  |
| H  | -3.953641 | -3.217102 | 0.270188  |
| H  | -4.814605 | 2.379616  | -0.219487 |
| H  | -3.034452 | 4.379726  | -0.381275 |
| N  | 1.316348  | -1.287738 | 0.059140  |
| H  | 0.871931  | -0.375867 | -0.019088 |
| H  | -0.967595 | 0.680149  | -0.058122 |
| Se | 0.036804  | 3.790590  | -0.315231 |
| C  | 4.968662  | -0.467568 | 0.038431  |
| C  | 5.670611  | -0.867314 | -1.099223 |
| C  | 5.707813  | -0.284130 | 1.207504  |
| C  | 7.045525  | -1.071391 | -1.083541 |
| C  | 7.083225  | -0.482189 | 1.248405  |
| C  | 7.753369  | -0.877493 | 0.096769  |
| C  | -4.971226 | -0.468689 | 0.039351  |
| C  | -5.715009 | -0.265151 | 1.202346  |
| C  | -5.670091 | -0.881500 | -1.095570 |
| C  | -7.090202 | -0.463392 | 1.242354  |
| C  | -7.045114 | -1.086170 | -1.080600 |
| C  | -7.756598 | -0.876307 | 0.094620  |
| F  | 5.093195  | 0.087071  | 2.337306  |
| F  | 7.762901  | -0.300197 | 2.384252  |
| F  | 9.072396  | -1.070484 | 0.124187  |

|   |           |           |           |
|---|-----------|-----------|-----------|
| F | 7.690021  | -1.447662 | -2.191771 |
| F | 5.020554  | -1.054769 | -2.254524 |
| F | -5.103450 | 0.123653  | 2.328159  |
| F | -7.773297 | -0.265770 | 2.373607  |
| F | -9.075591 | -1.069990 | 0.121019  |
| F | -7.686217 | -1.478354 | -2.185332 |
| F | -5.018236 | -1.082636 | -2.247332 |

---

43

10-SiMe2-Cor

|    |           |           |           |
|----|-----------|-----------|-----------|
| C  | 2.066653  | -1.616727 | -0.000191 |
| N  | 0.714545  | -1.736723 | -0.000083 |
| C  | 2.581097  | -2.932124 | -0.000582 |
| C  | 1.505291  | -3.824612 | -0.000696 |
| C  | 0.319967  | -3.062349 | -0.000414 |
| C  | 2.023305  | 1.584365  | -0.000317 |
| N  | 0.697563  | 1.651895  | -0.000019 |
| C  | 0.357116  | 3.016759  | -0.000314 |
| C  | 1.566493  | 3.805557  | -0.000763 |
| C  | 2.606971  | 2.921245  | -0.000722 |
| C  | -0.941446 | 3.497960  | -0.000269 |
| C  | -2.108624 | 2.697782  | 0.000158  |
| C  | -3.497520 | 2.974757  | -0.000487 |
| C  | -4.173913 | 1.748527  | -0.000301 |
| C  | -3.196762 | 0.727934  | 0.000502  |
| C  | -3.163239 | -0.718861 | 0.000355  |
| N  | -1.956862 | -1.269431 | 0.000168  |
| C  | -2.129165 | -2.636275 | -0.000035 |
| C  | -3.548728 | -2.936135 | 0.000022  |
| C  | -4.200743 | -1.731426 | 0.000274  |
| C  | -1.034424 | -3.481560 | -0.000341 |
| H  | 3.661944  | 3.157299  | -0.000956 |
| H  | 1.613704  | 4.885403  | -0.001023 |
| H  | -1.077053 | 4.574401  | -0.000709 |
| H  | -3.943192 | 3.957975  | -0.000985 |
| H  | -5.242432 | 1.600591  | -0.000601 |
| H  | -5.267218 | -1.560617 | 0.000408  |
| H  | -3.992320 | -3.921655 | -0.000116 |
| H  | -1.205827 | -4.552970 | -0.000526 |
| H  | 1.552249  | -4.903393 | -0.001079 |
| H  | 3.628330  | -3.194583 | -0.000680 |
| N  | -1.992030 | 1.339158  | 0.000849  |
| H  | -1.078970 | 0.886148  | 0.000877  |
| H  | 0.017969  | -0.995601 | 0.000113  |
| Si | 3.061081  | -0.002970 | 0.000295  |
| C  | 4.147954  | 0.000414  | 1.544559  |
| H  | 4.787167  | 0.887860  | 1.570390  |
| H  | 4.795934  | -0.880626 | 1.568716  |
| H  | 3.540119  | -0.003381 | 2.452939  |
| C  | 4.149976  | -0.000313 | -1.542483 |

|   |          |           |           |
|---|----------|-----------|-----------|
| H | 4.788464 | 0.887618  | -1.568706 |
| H | 3.543229 | -0.005835 | -2.451593 |
| H | 4.798703 | -0.880867 | -1.564735 |

---

63

10-SiMe2-PFPh-Cor

|    |           |           |           |
|----|-----------|-----------|-----------|
| C  | -1.593679 | 2.777114  | 0.035753  |
| N  | -1.741509 | 1.428988  | 0.004616  |
| C  | -2.897600 | 3.318929  | 0.068395  |
| C  | -3.812261 | 2.264436  | 0.057417  |
| C  | -3.075105 | 1.062595  | 0.017313  |
| C  | 1.612799  | 2.702263  | 0.017827  |
| N  | 1.682402  | 1.378659  | 0.012963  |
| C  | 3.048523  | 1.037951  | 0.004131  |
| C  | 3.836070  | 2.250918  | 0.003024  |
| C  | 2.950588  | 3.287287  | 0.011384  |
| C  | 3.519300  | -0.269801 | -0.009187 |
| C  | 2.680545  | -1.418746 | -0.021747 |
| C  | 2.929974  | -2.813778 | -0.028166 |
| C  | 1.692181  | -3.463552 | -0.035141 |
| C  | 0.692360  | -2.465506 | -0.031631 |
| C  | -0.750712 | -2.419542 | -0.028448 |
| N  | -1.301504 | -1.213553 | -0.007813 |
| C  | -2.667719 | -1.388154 | -0.011076 |
| C  | -2.965873 | -2.809979 | -0.036549 |
| C  | -1.762132 | -3.458590 | -0.046579 |
| C  | -3.520099 | -0.291309 | 0.002087  |
| H  | 3.186470  | 4.342079  | 0.012478  |
| H  | 4.914142  | 2.309356  | -0.005307 |
| H  | 3.901829  | -3.282230 | -0.027537 |
| H  | 1.522839  | -4.528731 | -0.040905 |
| H  | -1.590339 | -4.524533 | -0.065208 |
| H  | -3.947730 | -3.259438 | -0.046802 |
| H  | -4.888210 | 2.341334  | 0.077824  |
| H  | -3.138986 | 4.370655  | 0.097352  |
| N  | 1.325676  | -1.271560 | -0.025111 |
| H  | 0.897777  | -0.345011 | -0.013346 |
| H  | -1.019526 | 0.711524  | -0.011034 |
| Si | 0.031672  | 3.752378  | 0.029162  |
| C  | 0.041687  | 4.838111  | -1.514461 |
| H  | 0.026060  | 4.231464  | -2.423422 |
| H  | 0.935800  | 5.467586  | -1.544104 |
| H  | -0.831989 | 5.495950  | -1.533349 |
| C  | 0.056708  | 4.831077  | 1.577213  |
| H  | 0.950651  | 5.461056  | 1.599978  |
| H  | 0.051288  | 4.220519  | 2.483639  |
| H  | -0.816815 | 5.488695  | 1.608362  |
| C  | -4.996695 | -0.522828 | 0.003162  |
| C  | -5.750764 | -0.415372 | -1.165518 |
| C  | -5.680962 | -0.854019 | 1.172558  |

|   |           |           |           |
|---|-----------|-----------|-----------|
| C | -7.123910 | -0.630291 | -1.178197 |
| C | -7.053919 | -1.072607 | 1.185230  |
| C | -7.776822 | -0.960124 | 0.003720  |
| C | 4.995600  | -0.508621 | -0.010064 |
| C | 5.686425  | -0.777347 | -1.191311 |
| C | 5.737755  | -0.486985 | 1.170400  |
| C | 7.057035  | -1.008662 | -1.205985 |
| C | 7.108933  | -0.716030 | 1.181343  |
| C | 7.769744  | -0.977269 | -0.013128 |
| F | -5.151401 | -0.107935 | -2.322412 |
| F | -7.817880 | -0.526943 | -2.315292 |
| F | -9.093856 | -1.168749 | 0.003610  |
| F | -7.681779 | -1.385843 | 2.322288  |
| F | -5.017208 | -0.960685 | 2.330212  |
| F | 5.029810  | -0.808416 | -2.357642 |
| F | 7.692424  | -1.257036 | -2.354675 |
| F | 9.084724  | -1.197968 | -0.014685 |
| F | 7.793283  | -0.689531 | 2.328453  |
| F | 5.130773  | -0.245865 | 2.338803  |

---

55

10-S-PFPh-Cor

|   |           |           |           |
|---|-----------|-----------|-----------|
| C | -1.434119 | 2.883176  | -0.415105 |
| N | -1.607238 | 1.558696  | -0.220343 |
| C | -2.710318 | 3.485480  | -0.510360 |
| C | -3.649943 | 2.473716  | -0.368053 |
| C | -2.960753 | 1.250637  | -0.185006 |
| C | 1.464021  | 2.798885  | -0.407626 |
| N | 1.551391  | 1.494367  | -0.227733 |
| C | 2.922877  | 1.210260  | -0.188023 |
| C | 3.668288  | 2.437789  | -0.359421 |
| C | 2.757820  | 3.444115  | -0.497875 |
| C | 3.456955  | -0.071778 | -0.013941 |
| C | 2.662517  | -1.235775 | 0.129892  |
| C | 2.936993  | -2.615426 | 0.356108  |
| C | 1.716117  | -3.281404 | 0.442484  |
| C | 0.689987  | -2.315616 | 0.271000  |
| C | -0.742922 | -2.261861 | 0.269314  |
| N | -1.274000 | -1.049365 | 0.093569  |
| C | -2.633146 | -1.184963 | 0.133620  |
| C | -2.968255 | -2.583123 | 0.347888  |
| C | -1.780528 | -3.258333 | 0.433066  |
| C | -3.457491 | -0.064495 | -0.005296 |
| H | 2.941911  | 4.497717  | -0.644138 |
| H | 4.743520  | 2.531327  | -0.376626 |
| H | 3.916970  | -3.057513 | 0.447443  |
| H | 1.569013  | -4.336388 | 0.612614  |
| H | -1.638160 | -4.317203 | 0.590264  |
| H | -3.960825 | -3.001353 | 0.426728  |
| H | -4.721890 | 2.589810  | -0.394123 |



|   |           |           |           |
|---|-----------|-----------|-----------|
| H | -2.896324 | 4.536340  | -0.665657 |
| N | 1.308790  | -1.128464 | 0.082189  |
| H | 0.852761  | -0.229296 | -0.050289 |
| H | -0.913955 | 0.816866  | -0.120826 |
| S | 0.036728  | 3.806044  | -0.541561 |
| C | 4.940320  | -0.239474 | 0.032249  |
| C | 5.651508  | -0.723231 | -1.066675 |
| C | 5.675448  | 0.061195  | 1.179679  |
| C | 7.030288  | -0.896824 | -1.034877 |
| C | 7.054609  | -0.104071 | 1.235975  |
| C | 7.733462  | -0.585220 | 0.122777  |
| C | -4.939594 | -0.241238 | 0.035601  |
| C | -5.682236 | 0.080211  | 1.172747  |
| C | -5.644271 | -0.743471 | -1.059308 |
| C | -7.060767 | -0.089245 | 1.225964  |
| C | -7.022720 | -0.921744 | -1.030282 |
| C | -7.732513 | -0.593183 | 0.118434  |
| F | 7.729652  | 0.190392  | 2.350812  |
| F | 9.056169  | -0.747751 | 0.165364  |
| F | 7.683018  | -1.355032 | -2.106855 |
| F | 5.006743  | -1.023502 | -2.201015 |
| F | 5.053149  | 0.515912  | 2.274256  |
| F | -5.066187 | 0.557328  | 2.261651  |
| F | -7.742006 | 0.221910  | 2.332527  |
| F | -9.054775 | -0.760292 | 0.157913  |
| F | -7.668824 | -1.400759 | -2.097201 |
| F | -4.995056 | -1.058604 | -2.186771 |

36

21-O-Cor

|   |           |           |           |
|---|-----------|-----------|-----------|
| C | 0.727106  | -2.847438 | 0.000158  |
| C | 0.101151  | -4.140807 | 0.000444  |
| C | -1.259031 | -3.962903 | -0.000148 |
| C | -1.535591 | -2.551693 | -0.000296 |
| H | 0.635867  | -5.078653 | 0.000798  |
| H | -2.017603 | -4.731172 | -0.000275 |
| C | 2.629272  | -1.214149 | 0.000039  |
| C | 4.053812  | -0.912191 | -0.000303 |
| C | 4.166847  | 0.443966  | -0.000234 |
| C | 2.814785  | 0.977353  | 0.000093  |
| H | 4.849858  | -1.643304 | -0.000534 |
| H | 5.072918  | 1.033282  | -0.000397 |
| C | 2.078837  | -2.512393 | 0.000166  |
| N | -0.301674 | -1.937283 | -0.000163 |
| N | 1.912038  | -0.062110 | 0.000253  |
| H | 2.777220  | -3.341292 | 0.000276  |
| H | -0.132933 | -0.946198 | -0.000208 |
| C | 1.134648  | 2.792936  | 0.000069  |
| C | -1.104408 | 2.462964  | 0.000156  |
| C | -0.876724 | 3.868008  | 0.000032  |

|   |           |           |           |
|---|-----------|-----------|-----------|
| H | 0.373285  | 0.886380  | 0.001016  |
| H | -1.641386 | 4.629217  | -0.000038 |
| C | 2.465193  | 2.335463  | 0.000064  |
| H | 3.262848  | 3.068290  | -0.000013 |
| C | 0.498323  | 4.071163  | -0.000297 |
| N | 0.123834  | 1.877786  | 0.000275  |
| C | -2.968290 | -0.521248 | -0.000268 |
| C | -4.081600 | 0.330378  | 0.000260  |
| C | -3.611047 | 1.650318  | 0.000019  |
| C | -2.219684 | 1.596457  | 0.000079  |
| O | -1.849130 | 0.271660  | 0.000107  |
| H | -5.112185 | 0.011531  | 0.000502  |
| H | -4.206094 | 2.549927  | -0.000026 |
| C | -2.772872 | -1.908370 | -0.000501 |
| H | -3.658167 | -2.530877 | -0.000792 |
| H | 1.005657  | 5.023938  | -0.000905 |

---

66

21-O-PFPh-Cor

|   |           |           |           |
|---|-----------|-----------|-----------|
| C | -1.237983 | 1.571269  | -0.049588 |
| C | -2.532425 | 2.191236  | -0.093208 |
| C | -3.484382 | 1.206962  | -0.063164 |
| C | -2.822911 | -0.065963 | 0.000911  |
| H | -2.706445 | 3.254064  | -0.146257 |
| H | -4.553823 | 1.343302  | -0.089566 |
| C | 1.273613  | 1.492966  | -0.049376 |
| C | 2.575382  | 2.146045  | -0.067945 |
| C | 3.508836  | 1.160245  | -0.039999 |
| C | 2.787375  | -0.100159 | -0.003129 |
| H | 2.752720  | 3.210144  | -0.097962 |
| H | 4.581832  | 1.277467  | -0.048221 |
| C | 0.028198  | 2.169077  | -0.069776 |
| N | -1.473080 | 0.219228  | 0.007967  |
| N | 1.432528  | 0.144817  | -0.011631 |
| H | -0.726035 | -0.451062 | 0.057586  |
| C | 2.599899  | -2.567348 | 0.030645  |
| C | 0.645558  | -3.695546 | 0.048174  |
| C | 1.694271  | -4.655551 | 0.114881  |
| H | 0.823628  | -1.542402 | -0.045755 |
| H | 1.566292  | -5.725271 | 0.169497  |
| C | 3.370437  | -1.384520 | 0.024178  |
| C | 2.896110  | -3.963207 | 0.104557  |
| N | 1.242528  | -2.474793 | -0.011108 |
| C | -2.671824 | -2.544402 | 0.056988  |
| C | -3.003407 | -3.905229 | 0.114509  |
| C | -1.809002 | -4.633788 | 0.116314  |
| C | -0.763501 | -3.716273 | 0.060841  |
| O | -1.307000 | -2.453454 | 0.022714  |
| H | -4.002902 | -4.307531 | 0.152846  |
| H | -1.704772 | -5.706489 | 0.154734  |

|   |           |           |           |
|---|-----------|-----------|-----------|
| C | -3.402237 | -1.342666 | 0.035504  |
| H | 3.883346  | -4.395621 | 0.150586  |
| C | 0.053946  | 3.665370  | -0.120929 |
| C | 0.123675  | 4.354132  | -1.332469 |
| C | 0.012207  | 4.437143  | 1.040847  |
| C | 0.153777  | 5.742749  | -1.393642 |
| C | 0.040544  | 5.826815  | 1.007509  |
| C | 0.111976  | 6.480869  | -0.216720 |
| C | 4.854954  | -1.518349 | 0.053845  |
| C | 5.595306  | -1.242558 | 1.205523  |
| C | 5.571941  | -1.942925 | -1.066885 |
| C | 6.978692  | -1.372588 | 1.244654  |
| C | 6.954727  | -2.082787 | -1.052392 |
| C | 7.660433  | -1.794997 | 0.109680  |
| C | -4.889403 | -1.453477 | 0.049537  |
| C | -5.630824 | -1.216782 | 1.209316  |
| C | -5.606540 | -1.809716 | -1.094825 |
| C | -7.016809 | -1.320630 | 1.234893  |
| C | -6.991843 | -1.923928 | -1.093950 |
| C | -7.698686 | -1.676728 | 0.077141  |
| F | -7.647376 | -2.261989 | -2.207770 |
| F | -9.027255 | -1.781643 | 0.090021  |
| F | -7.695695 | -1.088974 | 2.361748  |
| F | -5.006571 | -0.884413 | 2.345875  |
| F | -4.959229 | -2.044819 | -2.243167 |
| F | 4.972875  | -0.849893 | 2.324214  |
| F | 7.655617  | -1.103885 | 2.365255  |
| F | 8.987469  | -1.924971 | 0.135986  |
| F | 7.609491  | -2.484204 | -2.146255 |
| F | 4.927746  | -2.217068 | -2.209106 |
| F | 0.162422  | 3.674922  | -2.486177 |
| F | -0.055467 | 3.840189  | 2.237769  |
| F | 0.000028  | 6.536629  | 2.139316  |
| F | 0.139088  | 7.813628  | -0.262133 |
| F | 0.219952  | 6.371794  | -2.571187 |

36

22-O-Cor

|   |           |           |           |
|---|-----------|-----------|-----------|
| C | -3.031247 | -0.332665 | -0.000002 |
| C | -3.944066 | -1.414018 | 0.000119  |
| C | -3.225168 | -2.586567 | 0.000165  |
| C | -1.845291 | -2.261605 | 0.000020  |
| O | -1.747158 | -0.881658 | 0.000157  |
| H | -5.017781 | -1.304853 | -0.000064 |
| H | -3.614865 | -3.592831 | -0.000025 |
| C | -0.739951 | -3.096478 | 0.000015  |
| H | -0.987496 | -4.151760 | -0.000028 |
| C | 0.639280  | -2.806461 | 0.000120  |
| C | 2.586758  | -1.634363 | 0.000217  |
| H | 0.788889  | -0.638714 | 0.000601  |

|   |           |           |           |
|---|-----------|-----------|-----------|
| C | 2.909818  | -3.024811 | -0.000439 |
| H | 1.615306  | -4.811619 | -0.000594 |
| H | 3.911481  | -3.427686 | -0.000914 |
| C | 1.727790  | -3.737849 | -0.000273 |
| N | 1.210209  | -1.567573 | 0.000540  |
| C | 3.400749  | -0.486464 | 0.000209  |
| C | 2.889326  | 0.818801  | 0.000159  |
| C | 3.559550  | 2.107663  | 0.000226  |
| N | 1.543393  | 1.027004  | -0.000208 |
| C | 2.575774  | 3.065985  | 0.000145  |
| H | 4.628031  | 2.271305  | 0.000404  |
| C | 1.318682  | 2.351207  | -0.000195 |
| H | 2.707533  | 4.138146  | 0.000169  |
| C | -2.227425 | 2.021083  | -0.000216 |
| C | -2.218123 | 3.447167  | 0.000254  |
| C | -0.888664 | 3.871740  | -0.000046 |
| C | -0.063626 | 2.717297  | -0.000385 |
| N | -0.917350 | 1.656966  | -0.000610 |
| H | -3.094208 | 4.077832  | 0.000769  |
| H | -0.542341 | 4.893639  | 0.000258  |
| C | -3.238801 | 1.038514  | -0.000027 |
| H | -4.272151 | 1.361379  | 0.000310  |
| H | -0.585220 | 0.710117  | -0.000732 |
| H | 4.474138  | -0.635527 | 0.000133  |

66

22-O-PFPh-Cor

|   |           |           |           |
|---|-----------|-----------|-----------|
| C | 2.881763  | -0.054300 | 0.065993  |
| C | 3.531500  | 1.197972  | 0.098033  |
| C | 2.570870  | 2.181245  | 0.115713  |
| C | 1.299447  | 1.560082  | 0.097441  |
| O | 1.507099  | 0.191571  | 0.072230  |
| H | 4.600366  | 1.338110  | 0.106902  |
| H | 2.738821  | 3.245422  | 0.136939  |
| C | 0.031732  | 2.143035  | 0.101907  |
| C | -1.246991 | 1.534981  | 0.073632  |
| C | -2.875987 | -0.046563 | 0.020215  |
| H | -0.898645 | -0.611447 | -0.011101 |
| C | -3.506343 | 1.231528  | 0.075393  |
| H | -2.666279 | 3.259043  | 0.154858  |
| H | -4.571219 | 1.402019  | 0.094812  |
| C | -2.520218 | 2.191989  | 0.107858  |
| N | -1.519560 | 0.197257  | 0.017241  |
| C | -3.429369 | -1.347690 | -0.012663 |
| C | -2.628572 | -2.505002 | -0.012252 |
| C | -2.985448 | -3.912165 | -0.114313 |
| N | -1.275576 | -2.396761 | 0.046696  |
| C | -1.810059 | -4.616214 | -0.122644 |
| H | -3.984091 | -4.318220 | -0.179752 |
| C | -0.753685 | -3.633142 | -0.020520 |

|   |           |           |           |
|---|-----------|-----------|-----------|
| H | -1.689970 | -5.687359 | -0.189045 |
| C | 2.621541  | -2.526367 | 0.012923  |
| C | 2.922499  | -3.909523 | -0.173026 |
| C | 1.722424  | -4.613926 | -0.183378 |
| C | 0.669717  | -3.678906 | -0.004275 |
| N | 1.270146  | -2.464089 | 0.134877  |
| H | 3.909885  | -4.323733 | -0.304473 |
| H | 1.603629  | -5.676667 | -0.325381 |
| C | 3.403648  | -1.348795 | 0.021360  |
| H | 0.740697  | -1.621418 | 0.264491  |
| C | 0.034862  | 3.641831  | 0.143979  |
| C | 0.056484  | 4.338048  | 1.353150  |
| C | 0.004582  | 4.404444  | -1.024372 |
| C | 0.048094  | 5.727345  | 1.405944  |
| C | -0.004651 | 5.794551  | -0.998918 |
| C | 0.016923  | 6.456923  | 0.223083  |
| C | -4.913195 | -1.481874 | -0.054170 |
| C | -5.636329 | -1.941725 | 1.048787  |
| C | -5.647691 | -1.165551 | -1.199338 |
| C | -7.018856 | -2.083158 | 1.020345  |
| C | -7.030302 | -1.297004 | -1.251827 |
| C | -7.718024 | -1.758696 | -0.135927 |
| C | 4.886541  | -1.489438 | -0.043445 |
| C | 5.623151  | -1.931123 | 1.058350  |
| C | 5.602847  | -1.213416 | -1.210515 |
| C | 7.002903  | -2.091631 | 1.008937  |
| C | 6.982865  | -1.362810 | -1.283584 |
| C | 7.684446  | -1.805147 | -0.168169 |
| F | -0.032808 | 6.496389  | -2.135203 |
| F | -0.014686 | 3.798224  | -2.217539 |
| F | 0.009022  | 7.789325  | 0.260533  |
| F | 0.069098  | 6.364483  | 2.580042  |
| F | 0.086018  | 3.666043  | 2.510806  |
| F | -5.018968 | -0.733939 | -2.300574 |
| F | -5.000757 | -2.247784 | 2.186984  |
| F | -7.679989 | -2.519541 | 2.096716  |
| F | -9.044645 | -1.889612 | -0.174633 |
| F | -7.700723 | -0.991701 | -2.367002 |
| F | 4.959376  | -0.799008 | -2.309253 |
| F | 5.002016  | -2.202045 | 2.212568  |
| F | 7.677773  | -2.509947 | 2.083012  |
| F | 9.007596  | -1.953418 | -0.226979 |
| F | 7.636816  | -1.093249 | -2.416814 |

36

22-S-Cor

|   |           |           |           |
|---|-----------|-----------|-----------|
| C | -1.382944 | -2.674598 | -0.110805 |
| C | -0.818039 | -3.838179 | 0.492117  |
| C | 0.561912  | -3.851273 | 0.549541  |
| C | 1.189436  | -2.697462 | -0.006785 |

|   |           |           |           |
|---|-----------|-----------|-----------|
| H | -1.437894 | -4.581809 | 0.978114  |
| H | 1.127077  | -4.604532 | 1.084265  |
| C | 2.475661  | -2.195291 | 0.151471  |
| H | 3.235789  | -2.883121 | 0.508873  |
| C | 2.887207  | -0.842828 | 0.041951  |
| C | 2.758717  | 1.431163  | -0.012251 |
| H | 1.050900  | 0.279381  | -0.171313 |
| C | 4.125331  | 1.069452  | 0.176616  |
| H | 5.089130  | -0.906861 | 0.363181  |
| H | 4.940216  | 1.768656  | 0.289176  |
| C | 4.201993  | -0.309377 | 0.216375  |
| N | 2.066351  | 0.246967  | -0.124888 |
| C | 2.131077  | 2.690025  | 0.010186  |
| C | 0.746827  | 2.903578  | -0.036954 |
| C | 0.016020  | 4.142999  | 0.167911  |
| N | -0.143317 | 1.878194  | -0.180573 |
| C | -1.315944 | 3.819593  | 0.177693  |
| H | 0.452359  | 5.121950  | 0.308450  |
| C | -1.383909 | 2.393334  | -0.044320 |
| H | -2.153021 | 4.488223  | 0.315955  |
| C | -2.996126 | -0.765373 | -0.078596 |
| C | -4.142622 | -0.022224 | 0.336777  |
| C | -3.812698 | 1.334237  | 0.339350  |
| C | -2.460841 | 1.447365  | -0.078385 |
| N | -2.066073 | 0.184665  | -0.394735 |
| H | -5.084463 | -0.452710 | 0.642394  |
| H | -4.449088 | 2.147119  | 0.653119  |
| C | -2.662696 | -2.140019 | 0.026833  |
| H | -3.433568 | -2.797665 | 0.415546  |
| H | -1.082332 | 0.028175  | -0.558016 |
| H | 2.776717  | 3.551522  | 0.138028  |
| S | -0.046296 | -1.793615 | -0.873672 |

66

22-S-PFPh-Cor

|   |           |           |           |
|---|-----------|-----------|-----------|
| C | 2.904101  | -0.140367 | -0.231401 |
| C | 3.352159  | 1.140498  | 0.181942  |
| C | 2.384498  | 2.128860  | 0.157651  |
| C | 1.105039  | 1.692075  | -0.282199 |
| H | 4.344425  | 1.299529  | 0.584260  |
| H | 2.553798  | 3.127528  | 0.538386  |
| C | -0.147776 | 2.315845  | -0.183352 |
| C | -1.407029 | 1.652159  | -0.204137 |
| C | -2.945682 | -0.022395 | -0.113863 |
| H | -0.932163 | -0.467980 | -0.129373 |
| C | -3.645861 | 1.220384  | -0.122960 |
| H | -2.918748 | 3.292958  | -0.200557 |
| H | -4.717887 | 1.334055  | -0.087930 |
| C | -2.713857 | 2.234475  | -0.176854 |
| N | -1.609207 | 0.293158  | -0.179901 |

|   |           |           |           |
|---|-----------|-----------|-----------|
| C | -3.417908 | -1.353248 | -0.046737 |
| C | -2.571624 | -2.478874 | 0.015618  |
| C | -2.924567 | -3.887374 | -0.083008 |
| N | -1.214481 | -2.359289 | 0.087521  |
| C | -1.749496 | -4.587398 | -0.095566 |
| H | -3.922635 | -4.293730 | -0.153326 |
| C | -0.696319 | -3.603404 | 0.012975  |
| H | -1.623783 | -5.657623 | -0.166571 |
| C | 2.713917  | -2.598205 | -0.083917 |
| C | 2.940665  | -3.955235 | -0.454741 |
| C | 1.722078  | -4.630732 | -0.408416 |
| C | 0.728648  | -3.703082 | 0.001384  |
| N | 1.390821  | -2.542071 | 0.252066  |
| H | 3.885247  | -4.362624 | -0.780527 |
| H | 1.547740  | -5.656923 | -0.691941 |
| C | 3.505466  | -1.409227 | -0.127173 |
| H | 0.883854  | -1.723782 | 0.546675  |
| S | 1.269095  | 0.056377  | -0.887841 |
| C | -0.158985 | 3.789576  | 0.053506  |
| C | 0.215963  | 4.690144  | -0.947366 |
| C | -0.525886 | 4.337451  | 1.285751  |
| C | 0.221481  | 6.064802  | -0.742228 |
| C | -0.528772 | 5.708177  | 1.515002  |
| C | -0.153944 | 6.574973  | 0.495007  |
| C | 4.978740  | -1.518732 | -0.026525 |
| C | 5.829694  | -0.958720 | -0.989178 |
| C | 5.599073  | -2.195347 | 1.032616  |
| C | 7.212316  | -1.064859 | -0.909261 |
| C | 6.979317  | -2.313989 | 1.131131  |
| C | 7.790299  | -1.746411 | 0.155313  |
| C | -4.894721 | -1.563352 | -0.061795 |
| C | -5.584715 | -1.977768 | 1.079693  |
| C | -5.653915 | -1.362710 | -1.216780 |
| C | -6.959202 | -2.185064 | 1.078787  |
| C | -7.029046 | -1.562763 | -1.242802 |
| C | -7.683640 | -1.976057 | -0.088601 |
| F | -0.152250 | 7.891477  | 0.703695  |
| F | -0.878149 | 6.197458  | 2.708281  |
| F | -0.871334 | 3.534000  | 2.300005  |
| F | 0.569344  | 4.237829  | -2.156700 |
| F | 0.574930  | 6.897768  | -1.725027 |
| F | 5.318981  | -0.321532 | -2.050187 |
| F | 7.989184  | -0.530730 | -1.855803 |
| F | 9.115802  | -1.853950 | 0.240818  |
| F | 7.533156  | -2.954093 | 2.164736  |
| F | 4.860872  | -2.724224 | 2.016742  |
| F | -4.924462 | -2.173584 | 2.227833  |
| F | -7.588807 | -2.574778 | 2.191173  |
| F | -9.002679 | -2.171406 | -0.101396 |
| F | -7.723413 | -1.368901 | -2.368152 |

F -5.056548 -0.980962 -2.353410

---

37

Corrole

|   |           |           |           |
|---|-----------|-----------|-----------|
| C | 0.384574  | -2.841347 | -0.082064 |
| N | -0.508087 | -1.816347 | -0.054040 |
| C | -0.321949 | -4.112192 | -0.128254 |
| C | -1.652262 | -3.824534 | -0.123788 |
| C | -1.770245 | -2.378993 | -0.068073 |
| C | 1.790912  | -2.712912 | -0.050084 |
| C | 2.526533  | -1.533176 | 0.005618  |
| N | 1.964579  | -0.273638 | -0.014803 |
| C | 2.932988  | 0.724758  | 0.027856  |
| C | 4.184546  | 0.027320  | 0.116064  |
| C | 3.942137  | -1.324595 | 0.104484  |
| C | 2.686954  | 2.096553  | 0.002665  |
| C | 1.399193  | 2.674044  | 0.022981  |
| C | 0.883984  | 3.937495  | -0.353781 |
| C | -0.513821 | 3.883173  | -0.301846 |
| C | -0.888420 | 2.592501  | 0.118123  |
| C | -2.065213 | 1.793900  | 0.127420  |
| N | -1.867312 | 0.442709  | 0.151379  |
| C | -3.038426 | -0.256368 | 0.083037  |
| C | -4.071186 | 0.724761  | 0.059403  |
| C | -3.471742 | 1.982689  | 0.082525  |
| C | -2.972744 | -1.659949 | -0.014328 |
| H | 1.015060  | -0.165025 | -0.336252 |
| H | -1.001948 | -0.099706 | 0.056021  |
| H | 4.673595  | -2.115832 | 0.172373  |
| H | 5.144579  | 0.514167  | 0.201707  |
| H | 3.543878  | 2.753509  | -0.075779 |
| H | 1.476516  | 4.769258  | -0.703519 |
| H | -1.194331 | 4.660919  | -0.612599 |
| H | -3.976559 | 2.936369  | 0.081124  |
| H | -5.130417 | 0.520457  | 0.019438  |
| H | -3.899835 | -2.218292 | -0.060391 |
| H | -2.480234 | -4.518990 | -0.144982 |
| H | 0.144972  | -5.086483 | -0.158823 |
| H | 2.362923  | -3.633504 | -0.054768 |
| N | 0.292894  | 1.905129  | 0.330093  |
| H | 0.352410  | 1.119396  | 0.960290  |

---

37

N1-Con-Cor

|   |           |           |           |
|---|-----------|-----------|-----------|
| C | -1.559785 | -2.480029 | -0.114205 |
| C | 0.098306  | -3.959824 | 0.336627  |
| C | 0.728945  | -2.784799 | -0.105721 |
| H | -1.919253 | -4.428417 | 0.685175  |
| H | 0.526875  | -4.883165 | 0.695016  |



|   |           |           |           |
|---|-----------|-----------|-----------|
| C | 2.141510  | -2.514610 | -0.115402 |
| H | 2.824185  | -3.355387 | -0.065920 |
| C | 2.711979  | -1.256851 | -0.118243 |
| C | 2.893189  | 1.025155  | -0.019129 |
| C | 4.224407  | 0.464300  | -0.052926 |
| H | 4.925670  | -1.612096 | -0.144615 |
| H | 5.134771  | 1.044737  | -0.029870 |
| C | 4.117321  | -0.896729 | -0.109048 |
| C | 2.454002  | 2.343299  | 0.059170  |
| C | 1.082189  | 2.710509  | 0.111597  |
| C | 0.485268  | 4.034724  | 0.073269  |
| C | -0.877045 | 3.858007  | 0.068482  |
| H | 1.020807  | 4.973163  | 0.038923  |
| C | -1.097012 | 2.435267  | 0.117651  |
| H | -1.636260 | 4.626162  | 0.038685  |
| C | -3.043954 | -0.539032 | -0.011130 |
| C | -4.134878 | 0.379728  | -0.239584 |
| C | -3.643606 | 1.670197  | -0.174207 |
| C | -2.237274 | 1.598830  | 0.105353  |
| H | -5.147365 | 0.090402  | -0.478302 |
| H | -4.202558 | 2.577699  | -0.343897 |
| C | -2.877045 | -1.917212 | -0.102145 |
| H | -3.747412 | -2.558926 | -0.172036 |
| H | 3.203802  | 3.124995  | 0.065538  |
| N | 2.037903  | -0.050497 | -0.080717 |
| H | 1.042806  | 0.138482  | 0.005326  |
| C | -0.330636 | -1.893669 | -0.426604 |
| H | -0.220450 | -0.965598 | -0.956919 |
| N | 0.102040  | 1.780684  | 0.150609  |
| N | -1.973309 | 0.273020  | 0.253115  |
| H | -1.050557 | -0.041127 | 0.499412  |
| N | -1.248112 | -3.773847 | 0.314229  |

67

N1-Con-PFPh-Cor

|   |           |           |           |
|---|-----------|-----------|-----------|
| C | -2.728992 | -0.270772 | -0.117973 |
| C | -2.415242 | 1.886300  | -0.716904 |
| C | -1.211515 | 1.456679  | -0.136191 |
| H | -4.214820 | 0.887082  | -1.121852 |
| H | -2.668893 | 2.831365  | -1.170205 |
| C | 0.019639  | 2.218211  | -0.075062 |
| C | 1.281342  | 1.648141  | 0.009076  |
| C | 2.920754  | 0.055525  | 0.035293  |
| C | 3.547393  | 1.352910  | 0.128180  |
| H | 2.711243  | 3.369939  | 0.190274  |
| H | 4.610286  | 1.523288  | 0.197671  |
| C | 2.569892  | 2.303090  | 0.118541  |
| C | 3.478369  | -1.226114 | 0.014827  |
| C | 2.679041  | -2.407333 | -0.072469 |
| C | 3.086052  | -3.793978 | 0.097534  |

|   |           |           |           |
|---|-----------|-----------|-----------|
| C | 1.942175  | -4.547482 | 0.069508  |
| H | 4.094485  | -4.152185 | 0.242628  |
| C | 0.858179  | -3.620395 | -0.132724 |
| H | 1.861350  | -5.619227 | 0.175887  |
| C | -2.569676 | -2.707231 | -0.129750 |
| C | -2.758104 | -4.091707 | 0.233840  |
| C | -1.531292 | -4.719576 | 0.211996  |
| C | -0.543485 | -3.749949 | -0.166526 |
| H | -3.696751 | -4.532486 | 0.531609  |
| H | -1.329144 | -5.744209 | 0.483227  |
| C | -3.374940 | -1.565203 | -0.080664 |
| N | 1.568513  | 0.296480  | -0.021562 |
| H | 0.951952  | -0.502597 | -0.153419 |
| C | -1.445076 | 0.113099  | 0.265657  |
| H | -0.784593 | -0.485876 | 0.867298  |
| N | 1.340896  | -2.345003 | -0.230271 |
| N | -1.239213 | -2.611037 | -0.435981 |
| H | -0.768435 | -1.768570 | -0.719290 |
| N | -3.303145 | 0.862700  | -0.691384 |
| C | -0.086373 | 3.700284  | -0.154641 |
| C | 0.407247  | 4.431358  | -1.240695 |
| C | -0.720814 | 4.437776  | 0.852115  |
| C | 0.289073  | 5.814257  | -1.321775 |
| C | -0.854004 | 5.819206  | 0.792119  |
| C | -0.344406 | 6.511412  | -0.300467 |
| C | -4.841104 | -1.666122 | 0.022186  |
| C | -5.602028 | -2.488514 | -0.825286 |
| C | -5.567755 | -0.935527 | 0.977649  |
| C | -6.983686 | -2.587244 | -0.726485 |
| C | -6.949516 | -1.014373 | 1.087779  |
| C | -7.663508 | -1.846916 | 0.233628  |
| C | 4.956751  | -1.364254 | 0.126001  |
| C | 5.643383  | -1.067944 | 1.306519  |
| C | 5.729856  | -1.818187 | -0.946497 |
| C | 7.021705  | -1.207392 | 1.420029  |
| C | 7.108281  | -1.970512 | -0.857114 |
| C | 7.757084  | -1.662129 | 0.332499  |
| F | -0.464987 | 7.837932  | -0.368822 |
| F | 0.765923  | 6.475515  | -2.381413 |
| F | -1.454786 | 6.488550  | 1.780894  |
| F | -1.203467 | 3.812422  | 1.933609  |
| F | 0.996958  | 3.800105  | -2.265686 |
| F | -5.005168 | -3.187405 | -1.801104 |
| F | -7.666936 | -3.372309 | -1.564472 |
| F | -8.989977 | -1.932902 | 0.333132  |
| F | -7.595049 | -0.312602 | 2.023534  |
| F | -4.922527 | -0.151822 | 1.852620  |
| F | 4.970532  | -0.646427 | 2.386898  |
| F | 5.145903  | -2.108068 | -2.116595 |
| F | 7.815390  | -2.399555 | -1.907722 |

|   |          |           |          |
|---|----------|-----------|----------|
| F | 9.080606 | -1.801369 | 0.429599 |
| F | 7.642672 | -0.918161 | 2.568645 |

37

N2-Con-Cor

|   |           |           |           |
|---|-----------|-----------|-----------|
| C | -2.936601 | 0.880708  | 0.097024  |
| C | -4.028048 | -1.130676 | -0.001789 |
| C | -2.601888 | -1.390477 | 0.003358  |
| H | -5.171938 | 0.736208  | 0.063055  |
| H | -4.784786 | -1.899790 | -0.045217 |
| C | -1.926908 | -2.595963 | -0.070639 |
| H | -2.539359 | -3.487035 | -0.140061 |
| C | -0.515833 | -2.790546 | -0.077993 |
| C | 1.660381  | -2.445840 | -0.060805 |
| C | 1.465294  | -3.880922 | -0.178932 |
| H | -0.394802 | -5.043020 | -0.263935 |
| H | 2.255936  | -4.615152 | -0.243863 |
| C | 0.123568  | -4.097764 | -0.186466 |
| C | 2.890566  | -1.798675 | -0.023890 |
| C | 3.051345  | -0.390514 | 0.089452  |
| C | 4.125329  | 0.525742  | 0.010156  |
| C | 3.587392  | 1.825628  | 0.069436  |
| H | 5.169352  | 0.269479  | -0.088061 |
| C | 2.189618  | 1.702559  | 0.191379  |
| H | 4.144911  | 2.749704  | 0.054496  |
| C | -1.284810 | 2.713943  | 0.130567  |
| C | -0.696568 | 3.746232  | -0.607296 |
| C | 0.991569  | 2.515217  | 0.250435  |
| H | -1.144891 | 4.515158  | -1.216228 |
| H | 1.321444  | 4.150253  | -1.074199 |
| C | -2.647332 | 2.224086  | 0.095815  |
| H | -3.476983 | 2.913361  | -0.011870 |
| H | 3.782331  | -2.408329 | -0.111547 |
| N | 0.416360  | -1.820564 | -0.000917 |
| H | -1.009825 | -0.061123 | -0.017996 |
| N | 1.925952  | 0.368213  | 0.217013  |
| H | -0.285959 | 1.192302  | 1.420446  |
| N | -2.006271 | -0.157542 | 0.089604  |
| C | -4.225484 | 0.216177  | 0.050785  |
| C | -0.203282 | 2.011739  | 0.727170  |
| N | 0.664887  | 3.616243  | -0.527597 |
| H | 1.018217  | -0.100383 | 0.181658  |

67

N2-Con-PFPh-Cor

|   |           |           |           |
|---|-----------|-----------|-----------|
| C | -2.905440 | -0.007131 | -0.186500 |
| C | -2.532919 | 2.243962  | -0.305200 |
| C | -1.250166 | 1.581060  | -0.190839 |
| H | -4.573556 | 1.474578  | -0.395698 |

|   |           |           |           |
|---|-----------|-----------|-----------|
| H | -2.665559 | 3.310540  | -0.393922 |
| C | 0.019631  | 2.147968  | -0.160393 |
| C | 1.267680  | 1.443513  | -0.108278 |
| C | 2.790182  | -0.145664 | -0.053317 |
| C | 3.502865  | 1.117112  | 0.006195  |
| H | 2.742385  | 3.164429  | -0.000373 |
| H | 4.574205  | 1.238110  | 0.057965  |
| C | 2.568113  | 2.099976  | -0.030207 |
| C | 3.381555  | -1.413751 | -0.058579 |
| C | 2.637475  | -2.624065 | -0.168207 |
| C | 2.922138  | -3.999205 | 0.003470  |
| C | 1.704333  | -4.696809 | -0.045244 |
| H | 3.898885  | -4.430165 | 0.159225  |
| C | 0.681702  | -3.750540 | -0.252774 |
| H | 1.575474  | -5.764986 | 0.037668  |
| C | -2.688026 | -2.459711 | -0.156266 |
| C | -2.818197 | -3.608760 | 0.631060  |
| C | -0.760802 | -3.670423 | -0.289369 |
| H | -3.622236 | -3.930901 | 1.273197  |
| H | -1.443471 | -5.134688 | 1.100738  |
| C | -3.502996 | -1.254348 | -0.141467 |
| N | 1.420566  | 0.104730  | -0.120651 |
| H | -0.816865 | -0.440988 | 0.056719  |
| N | 1.289947  | -2.538480 | -0.350923 |
| H | -1.014362 | -1.877164 | -1.507278 |
| N | -1.534457 | 0.239572  | -0.134550 |
| C | -3.513149 | 1.300845  | -0.302065 |
| C | -1.422371 | -2.564342 | -0.785810 |
| N | -1.659831 | -4.325896 | 0.539538  |
| H | 0.857488  | -1.611818 | -0.356314 |
| C | 0.081074  | 3.643084  | -0.187614 |
| C | -0.096814 | 4.406589  | 0.967444  |
| C | 0.326757  | 4.343907  | -1.369857 |
| C | -0.035253 | 5.795606  | 0.955732  |
| C | 0.395354  | 5.731770  | -1.409275 |
| C | 0.212701  | 6.459811  | -0.239471 |
| C | 4.860432  | -1.534960 | 0.090181  |
| C | 5.668580  | -1.919534 | -0.981995 |
| C | 5.500882  | -1.300198 | 1.308617  |
| C | 7.046117  | -2.055496 | -0.858529 |
| C | 6.876992  | -1.430025 | 1.457028  |
| C | 7.652029  | -1.809107 | 0.367777  |
| C | -4.972545 | -1.376595 | -0.007133 |
| C | -5.688776 | -0.810948 | 1.055676  |
| C | -5.721478 | -2.120691 | -0.929548 |
| C | -7.063785 | -0.962697 | 1.190766  |
| C | -7.094756 | -2.287474 | -0.813298 |
| C | -7.770869 | -1.703849 | 0.252306  |
| F | 0.273960  | 7.792234  | -0.264369 |
| F | -0.209605 | 6.495358  | 2.081494  |

|   |           |           |           |
|---|-----------|-----------|-----------|
| F | 0.628653  | 6.370681  | -2.560286 |
| F | 0.500770  | 3.676330  | -2.518207 |
| F | -0.331597 | 3.801625  | 2.139595  |
| F | 4.787187  | -0.952241 | 2.386889  |
| F | 7.457640  | -1.202034 | 2.639115  |
| F | 8.973110  | -1.936476 | 0.498662  |
| F | 7.791246  | -2.413664 | -1.908557 |
| F | 5.121918  | -2.151613 | -2.182152 |
| F | -5.048608 | -0.122679 | 2.011940  |
| F | -5.115639 | -2.674456 | -1.987597 |
| F | -7.773534 | -2.990075 | -1.725267 |
| F | -9.090137 | -1.855722 | 0.373041  |
| F | -7.707079 | -0.416129 | 2.227261  |

37

Neo-Con-Cor

|   |           |           |           |
|---|-----------|-----------|-----------|
| C | 3.033864  | -0.379278 | 0.073617  |
| C | 3.715087  | 1.801898  | 0.054704  |
| C | 2.270647  | 1.793995  | 0.002036  |
| H | 5.194840  | 0.187124  | 0.144688  |
| H | 4.312763  | 2.701316  | 0.064236  |
| C | 1.415138  | 2.883510  | -0.063887 |
| H | 1.892330  | 3.854319  | -0.118420 |
| C | -0.001933 | 2.898272  | -0.077545 |
| C | -2.154639 | 2.158563  | -0.050653 |
| C | -2.179673 | 3.572066  | -0.207683 |
| H | -0.538111 | 5.044292  | -0.336962 |
| H | -3.073546 | 4.169879  | -0.304687 |
| C | -0.871979 | 4.024181  | -0.222469 |
| C | -3.177428 | 1.194362  | -0.010138 |
| C | -2.950190 | -0.180803 | 0.109314  |
| C | -3.858532 | -1.297265 | 0.028003  |
| C | -3.091579 | -2.444898 | 0.079534  |
| H | -4.933075 | -1.240132 | -0.073771 |
| C | -1.738864 | -1.987038 | 0.199154  |
| H | -3.431859 | -3.469069 | 0.051416  |
| C | 1.723225  | -2.468602 | 0.082638  |
| C | 1.288234  | -3.638357 | -0.658705 |
| H | 1.912257  | -4.295356 | -1.245256 |
| H | -0.773904 | -4.397455 | -1.010341 |
| C | 2.976004  | -1.756283 | 0.051269  |
| H | 3.908974  | -2.293509 | -0.077575 |
| N | -0.818742 | 1.810071  | 0.029607  |
| H | 1.018741  | 0.095977  | -0.234362 |
| N | -1.662301 | -0.664796 | 0.224882  |
| H | 0.460124  | -1.148701 | 1.360140  |
| N | 1.915668  | 0.460335  | 0.045718  |
| C | 4.166994  | 0.513806  | 0.090700  |
| C | 0.582625  | -1.973041 | 0.684791  |
| H | -4.197351 | 1.547520  | -0.112598 |

|   |           |           |           |
|---|-----------|-----------|-----------|
| H | -0.625336 | 0.817043  | 0.181030  |
| N | -0.517694 | -2.680280 | 0.273841  |
| C | -0.071230 | -3.723514 | -0.548991 |

---

67

Neo-Con-PFPh-Cor

|   |           |           |           |
|---|-----------|-----------|-----------|
| C | -2.884019 | -0.052965 | -0.218076 |
| C | -2.545037 | 2.193896  | -0.408318 |
| C | -1.256804 | 1.573818  | -0.206090 |
| H | -4.565195 | 1.376201  | -0.571074 |
| H | -2.696015 | 3.251405  | -0.556222 |
| C | -0.011102 | 2.199495  | -0.151034 |
| C | 1.271247  | 1.579297  | -0.077307 |
| C | 2.880873  | -0.025247 | -0.042141 |
| C | 3.518129  | 1.234968  | 0.103696  |
| H | 2.695053  | 3.274197  | 0.188417  |
| H | 4.579512  | 1.389980  | 0.218092  |
| C | 2.541348  | 2.212248  | 0.084597  |
| C | 3.405439  | -1.339502 | -0.062689 |
| C | 2.601513  | -2.479929 | -0.190445 |
| C | 2.925782  | -3.882911 | -0.070562 |
| C | 1.735239  | -4.573400 | -0.122114 |
| H | 3.911286  | -4.305692 | 0.057469  |
| C | 0.724315  | -3.567168 | -0.281396 |
| H | 1.588006  | -5.641266 | -0.067714 |
| C | -2.593399 | -2.498260 | -0.159116 |
| C | -2.701897 | -3.726373 | 0.606622  |
| H | -3.543077 | -4.039840 | 1.205376  |
| H | -1.171955 | -5.301142 | 0.959001  |
| C | -3.440076 | -1.323415 | -0.157527 |
| N | 1.527243  | 0.238592  | -0.148736 |
| H | -0.881858 | -0.463428 | 0.266373  |
| N | 1.236372  | -2.348467 | -0.332790 |
| H | -0.897442 | -1.862490 | -1.455820 |
| N | -1.516596 | 0.220106  | -0.115978 |
| C | -3.508677 | 1.228811  | -0.410829 |
| C | -1.359016 | -2.547935 | -0.771881 |
| H | 0.922851  | -0.568004 | -0.325909 |
| N | -0.673096 | -3.656787 | -0.351425 |
| C | -1.518165 | -4.394584 | 0.491290  |
| C | -0.011718 | 3.694815  | -0.176608 |
| C | -0.311392 | 4.448151  | 0.960194  |
| C | 0.299319  | 4.406459  | -1.337272 |
| C | -0.307652 | 5.838487  | 0.950224  |
| C | 0.312132  | 5.795873  | -1.373580 |
| C | 0.006743  | 6.513842  | -0.223040 |
| C | -4.905287 | -1.484621 | -0.015559 |
| C | -5.633171 | -2.286475 | -0.905603 |
| C | -5.635793 | -0.898229 | 1.026199  |
| C | -7.000944 | -2.487989 | -0.778901 |

|   |           |           |           |
|---|-----------|-----------|-----------|
| C | -7.005134 | -1.084858 | 1.171526  |
| C | -7.691691 | -1.882914 | 0.264911  |
| C | 4.879790  | -1.505847 | 0.097164  |
| C | 5.695625  | -1.833709 | -0.987034 |
| C | 5.505932  | -1.351052 | 1.335010  |
| C | 7.069280  | -2.000040 | -0.853167 |
| C | 6.877268  | -1.512346 | 1.494146  |
| C | 7.661235  | -1.838362 | 0.393776  |
| F | 0.014048  | 7.846976  | -0.245661 |
| F | 0.608103  | 6.445215  | -2.503492 |
| F | -0.597660 | 6.528333  | 2.057337  |
| F | -0.609588 | 3.832115  | 2.111501  |
| F | 0.588013  | 3.748111  | -2.467238 |
| F | -7.662476 | -0.516292 | 2.187009  |
| F | -5.014658 | -0.154227 | 1.952690  |
| F | -5.014323 | -2.864235 | -1.942660 |
| F | -7.660570 | -3.244616 | -1.660863 |
| F | -9.005655 | -2.067476 | 0.394906  |
| F | 5.162375  | -1.984561 | -2.205584 |
| F | 7.823132  | -2.307583 | -1.912475 |
| F | 8.977736  | -1.995606 | 0.534272  |
| F | 7.444704  | -1.363306 | 2.694689  |
| F | 4.780148  | -1.051316 | 2.420028  |

67

PFPh-Corrole

|   |           |           |           |
|---|-----------|-----------|-----------|
| C | -1.264590 | 1.470647  | 0.037112  |
| N | -1.427194 | 0.119894  | 0.034001  |
| C | -2.562798 | 2.124989  | -0.023155 |
| C | -3.499412 | 1.141804  | -0.055036 |
| C | -2.786335 | -0.120505 | -0.011546 |
| C | -0.024249 | 2.156470  | 0.113066  |
| C | 1.248000  | 1.574334  | 0.163481  |
| N | 1.499973  | 0.222167  | 0.054561  |
| C | 2.862641  | -0.050264 | 0.142529  |
| C | 3.489972  | 1.219335  | 0.349254  |
| C | 2.524026  | 2.193876  | 0.361515  |
| C | 3.448130  | -1.324743 | 0.078438  |
| C | 2.686533  | -2.519771 | 0.080472  |
| C | 2.951461  | -3.841614 | -0.352863 |
| C | 1.764001  | -4.573569 | -0.293135 |
| C | 0.747800  | -3.720770 | 0.181371  |
| C | -0.670210 | -3.720075 | 0.195824  |
| N | -1.273128 | -2.496245 | 0.263417  |
| C | -2.627837 | -2.588262 | 0.132891  |
| C | -2.919780 | -3.980821 | 0.041662  |
| C | -1.715215 | -4.673719 | 0.076151  |
| C | -3.382036 | -1.399378 | 0.016116  |
| H | 0.799718  | -0.390806 | -0.334154 |
| H | -0.867579 | -1.554351 | 0.198902  |

|   |           |           |           |
|---|-----------|-----------|-----------|
| H | 4.547880  | 1.361220  | 0.504990  |
| H | 3.895361  | -4.191378 | -0.741035 |
| H | 1.620197  | -5.586724 | -0.635048 |
| H | -1.585850 | -5.743735 | 0.028802  |
| H | -3.903530 | -4.413173 | -0.054448 |
| H | -4.571304 | 1.263728  | -0.090112 |
| N | 1.352291  | -2.503246 | 0.426203  |
| H | 0.971582  | -1.820819 | 1.064448  |
| C | -0.064208 | 3.651861  | 0.167173  |
| C | -0.315174 | 4.335511  | 1.357814  |
| C | 0.148388  | 4.430265  | -0.971644 |
| C | -0.357957 | 5.723661  | 1.419995  |
| C | 0.111860  | 5.819631  | -0.936826 |
| C | -0.143611 | 6.467732  | 0.265789  |
| C | 4.925695  | -1.433767 | -0.028793 |
| C | 5.627678  | -0.945455 | -1.135977 |
| C | 5.686039  | -2.052936 | 0.969180  |
| C | 7.008436  | -1.058129 | -1.246693 |
| C | 7.066523  | -2.179741 | 0.879304  |
| C | 7.730606  | -1.678885 | -0.234420 |
| C | -4.862348 | -1.523171 | -0.100727 |
| C | -5.529934 | -1.277207 | -1.302943 |
| C | -5.649915 | -1.911282 | 0.985765  |
| C | -6.909238 | -1.400642 | -1.422477 |
| C | -7.030203 | -2.043441 | 0.891084  |
| C | -7.661975 | -1.785775 | -0.319586 |
| F | -0.180980 | 7.800169  | 0.312731  |
| F | 0.316439  | 6.534750  | -2.047304 |
| F | -0.598088 | 6.346803  | 2.577955  |
| F | -0.518323 | 3.651565  | 2.491604  |
| F | 0.391271  | 3.839828  | -2.149139 |
| F | 5.087469  | -2.525177 | 2.070592  |
| F | 7.760417  | -2.766371 | 1.858809  |
| F | 9.055069  | -1.793414 | -0.330969 |
| F | 7.643784  | -0.587681 | -2.323688 |
| F | 4.968251  | -0.366574 | -2.147673 |
| F | -4.838489 | -0.923582 | -2.393895 |
| F | -7.514577 | -1.162149 | -2.589945 |
| F | -8.985900 | -1.908701 | -0.422945 |
| F | -7.753259 | -2.407763 | 1.954506  |
| F | -5.079377 | -2.153693 | 2.173519  |
| H | 2.679169  | 3.249016  | 0.521459  |
| H | -2.737208 | 3.189767  | -0.039494 |

.....



### Coordinates of Heterocorrins (XYZ Format):

44

10-NH-Corrin

|   |           |           |           |
|---|-----------|-----------|-----------|
| C | -2.022601 | 1.933175  | -0.199200 |
| N | -0.791684 | 1.567894  | -0.145386 |
| C | -2.268506 | 3.432652  | -0.198305 |
| C | -0.819158 | 3.963058  | -0.274405 |
| C | 0.018362  | 2.695715  | -0.066942 |
| C | -2.964469 | -0.332999 | -0.054040 |
| N | -1.938438 | -0.970157 | -0.469918 |
| C | -1.964093 | -2.267638 | 0.064962  |
| C | -3.361358 | -2.566580 | 0.602484  |
| C | -3.971550 | -1.150068 | 0.740875  |
| C | -0.835838 | -2.986821 | 0.206657  |
| C | 0.489571  | -2.498869 | -0.209076 |
| C | 0.751944  | -1.722771 | -1.489081 |
| C | 2.287808  | -1.681517 | -1.510570 |
| C | 2.655813  | -1.933255 | -0.027798 |
| C | 2.880436  | -0.632812 | 0.790770  |
| N | 1.763408  | 0.299174  | 0.622904  |
| C | 2.192356  | 1.484200  | 0.395589  |
| C | 3.715212  | 1.620816  | 0.410830  |
| C | 4.172937  | 0.149183  | 0.416249  |
| C | 1.349429  | 2.661701  | 0.172526  |
| H | -4.987985 | -1.068475 | 0.344834  |
| H | -3.925015 | -3.160270 | -0.123997 |
| H | -0.859623 | -3.909738 | 0.776227  |
| H | 0.303067  | -0.733691 | -1.399932 |
| H | 2.678248  | -0.737648 | -1.896841 |
| H | 4.986804  | -0.041355 | 1.118304  |
| H | 4.026940  | 2.159377  | 1.314434  |
| H | 1.867161  | 3.616788  | 0.192773  |
| H | -0.613051 | 4.400365  | -1.255436 |
| H | -2.893788 | 3.743571  | -1.039793 |
| H | -3.997923 | 1.446220  | -0.032157 |
| N | 1.514820  | -2.676984 | 0.540984  |
| H | 2.690981  | -2.486702 | -2.131779 |
| H | 0.308455  | -2.217074 | -2.358435 |
| H | 3.562734  | -2.537965 | 0.080541  |
| H | -3.344575 | -3.120079 | 1.541822  |
| H | -3.995687 | -0.807707 | 1.781907  |
| H | 2.896894  | -0.936369 | 1.845158  |
| H | -2.778918 | 3.741503  | 0.721086  |
| H | -0.605575 | 4.725785  | 0.475944  |
| H | 4.089244  | 2.193490  | -0.443062 |
| H | 4.524867  | -0.144142 | -0.576665 |
| N | -3.086822 | 1.047371  | -0.200598 |

64

## 10-NH-PFPh-Corrin

|   |           |           |           |
|---|-----------|-----------|-----------|
| C | -1.222988 | 3.048258  | 0.280016  |
| N | -1.284599 | 1.764191  | 0.345067  |
| C | -2.545053 | 3.767482  | 0.088352  |
| C | -3.532092 | 2.585214  | 0.173914  |
| C | -2.603217 | 1.365799  | 0.173393  |
| C | 1.237305  | 3.234750  | 0.338125  |
| N | 1.471267  | 2.027100  | 0.685691  |
| C | 2.806915  | 1.719157  | 0.423454  |
| C | 3.570514  | 2.984345  | 0.033228  |
| C | 2.438508  | 4.027693  | -0.143620 |
| C | 3.210250  | 0.429877  | 0.471204  |
| C | 2.247188  | -0.640504 | 0.864931  |
| C | 1.366041  | -0.579519 | 2.100549  |
| C | 0.808043  | -2.010927 | 2.144249  |
| C | 1.017303  | -2.509712 | 0.692005  |
| C | -0.234604 | -2.382738 | -0.211267 |
| N | -0.816119 | -1.036991 | -0.160559 |
| C | -2.089489 | -1.103323 | -0.062720 |
| C | -2.650939 | -2.528431 | -0.046558 |
| C | -1.377442 | -3.370899 | 0.145503  |
| C | -2.988895 | 0.072848  | -0.002720 |
| H | 2.593309  | 4.936861  | 0.445071  |
| H | 4.258779  | 3.272274  | 0.832734  |
| H | 0.589883  | 0.168882  | 1.943300  |
| H | -0.235987 | -2.042924 | 2.461533  |
| H | -1.361422 | -4.265557 | -0.479211 |
| H | -3.144170 | -2.746196 | -1.000554 |
| H | -4.111807 | 2.622950  | 1.099997  |
| H | -2.709426 | 4.529187  | 0.855433  |
| H | -0.120941 | 4.757717  | 0.144214  |
| N | 2.111337  | -1.684856 | 0.141729  |
| H | 1.384792  | -2.632061 | 2.834751  |
| H | 1.939249  | -0.300999 | 2.989198  |
| H | 1.323598  | -3.560566 | 0.656294  |
| H | 4.154924  | 2.859573  | -0.876889 |
| H | 2.310435  | 4.331445  | -1.187823 |
| H | 0.112311  | -2.540289 | -1.240384 |
| H | -2.577950 | 4.268547  | -0.885253 |
| H | -4.240254 | 2.565937  | -0.655633 |
| H | -3.395599 | -2.679653 | 0.739541  |
| H | -1.290883 | -3.696662 | 1.185719  |
| N | -0.044297 | 3.768241  | 0.324544  |
| C | 4.562281  | -0.009127 | 0.049506  |
| C | 5.064882  | 0.190892  | -1.237903 |
| C | 5.381991  | -0.729045 | 0.923990  |
| C | 6.311232  | -0.280215 | -1.633395 |
| C | 6.628478  | -1.213452 | 0.555296  |
| C | 7.097368  | -0.986614 | -0.733384 |
| C | -4.451495 | -0.197317 | -0.161891 |

|   |           |           |           |
|---|-----------|-----------|-----------|
| C | -5.348808 | -0.100633 | 0.903576  |
| C | -4.996383 | -0.573391 | -1.391990 |
| C | -6.707439 | -0.359145 | 0.763757  |
| C | -6.348887 | -0.842167 | -1.561462 |
| C | -7.209856 | -0.733853 | -0.475928 |
| F | 7.385912  | -1.885625 | 1.430327  |
| F | 8.297864  | -1.442453 | -1.101633 |
| F | 6.753655  | -0.066898 | -2.879003 |
| F | 4.334548  | 0.844348  | -2.157503 |
| F | 4.967044  | -0.960046 | 2.179842  |
| F | -7.532141 | -0.255063 | 1.812150  |
| F | -4.907344 | 0.249145  | 2.123320  |
| F | -4.200360 | -0.678189 | -2.467478 |
| F | -6.829729 | -1.194048 | -2.758917 |
| F | -8.512362 | -0.984960 | -0.624505 |

47

10-NMe-Corrin

|   |           |           |           |
|---|-----------|-----------|-----------|
| C | 2.146016  | 1.515315  | 0.174240  |
| N | 0.889912  | 1.347042  | -0.067552 |
| C | 2.575106  | 2.960581  | 0.396399  |
| C | 1.241171  | 3.706566  | 0.194401  |
| C | 0.241753  | 2.573324  | -0.063097 |
| C | 2.655915  | -0.856992 | 0.015838  |
| N | 1.556384  | -1.312069 | 0.483531  |
| C | 1.305137  | -2.569973 | -0.090048 |
| C | 2.583644  | -3.098911 | -0.729257 |
| C | 3.421034  | -1.811765 | -0.894819 |
| C | 0.064388  | -3.080718 | -0.190553 |
| C | -1.149660 | -2.396721 | 0.270371  |
| C | -1.242103 | -1.551056 | 1.528296  |
| C | -2.749882 | -1.254901 | 1.585144  |
| C | -3.200420 | -1.498530 | 0.123940  |
| C | -3.206153 | -0.213909 | -0.749297 |
| N | -1.932138 | 0.498044  | -0.630135 |
| C | -2.129490 | 1.750851  | -0.450318 |
| C | -3.601316 | 2.167421  | -0.466991 |
| C | -4.323356 | 0.808366  | -0.393520 |
| C | -1.088016 | 2.756264  | -0.247263 |
| H | 4.469482  | -1.935956 | -0.616994 |
| H | 3.084178  | -3.797053 | -0.050125 |
| H | -0.087402 | -3.974398 | -0.786732 |
| H | -0.637211 | -0.654111 | 1.398809  |
| H | -2.967772 | -0.245445 | 1.940228  |
| H | -5.175671 | 0.739932  | -1.072124 |
| H | -3.819678 | 2.706707  | -1.397127 |
| H | -1.441292 | 3.782922  | -0.201461 |
| H | 0.961417  | 4.296067  | 1.070069  |
| H | 2.987519  | 3.096290  | 1.401366  |
| N | -2.218981 | -2.444110 | -0.437794 |

|   |           |           |           |
|---|-----------|-----------|-----------|
| H | -3.260334 | -1.958135 | 2.249678  |
| H | -0.862158 | -2.088492 | 2.402224  |
| H | -4.201515 | -1.938332 | 0.060467  |
| H | 2.402765  | -3.621248 | -1.669032 |
| H | 3.399789  | -1.431802 | -1.923588 |
| H | -3.300566 | -0.552753 | -1.788741 |
| H | 3.346350  | 3.272842  | -0.312867 |
| H | 1.284889  | 4.390322  | -0.656822 |
| H | -3.852018 | 2.842703  | 0.356476  |
| H | -4.697944 | 0.630453  | 0.618521  |
| N | 3.060902  | 0.473478  | 0.217498  |
| C | 4.498088  | 0.761511  | 0.210942  |
| H | 5.034369  | -0.061633 | 0.680813  |
| H | 4.889135  | 0.906659  | -0.802544 |
| H | 4.699972  | 1.657415  | 0.794224  |

67

10-NMe-PFPh-Corrin

|   |           |           |           |
|---|-----------|-----------|-----------|
| C | -1.207471 | 2.981485  | 0.232280  |
| N | -1.222963 | 1.689653  | 0.197436  |
| C | -2.574927 | 3.646720  | 0.157265  |
| C | -3.504257 | 2.424033  | 0.078487  |
| C | -2.528399 | 1.243707  | 0.070437  |
| C | 1.229355  | 3.167744  | 0.289629  |
| N | 1.460166  | 1.994548  | 0.746897  |
| C | 2.769203  | 1.621324  | 0.430836  |
| C | 3.541909  | 2.824105  | -0.100668 |
| C | 2.424604  | 3.860049  | -0.353271 |
| C | 3.159713  | 0.331203  | 0.528998  |
| C | 2.222923  | -0.726793 | 0.989070  |
| C | 1.287162  | -0.598991 | 2.177172  |
| C | 0.763633  | -2.039722 | 2.302021  |
| C | 1.041713  | -2.629297 | 0.897205  |
| C | -0.161554 | -2.539568 | -0.074943 |
| N | -0.730578 | -1.187591 | -0.098560 |
| C | -2.007989 | -1.240213 | -0.060610 |
| C | -2.581719 | -2.661024 | -0.034770 |
| C | -1.329127 | -3.504858 | 0.258163  |
| C | -2.899287 | -0.061376 | -0.054999 |
| H | 2.643053  | 4.834552  | 0.087836  |
| H | 4.249026  | 3.180296  | 0.654445  |
| H | 0.501834  | 0.116082  | 1.936098  |
| H | -0.290493 | -2.079660 | 2.583308  |
| H | -1.287487 | -4.424161 | -0.328439 |
| H | -3.019924 | -2.902461 | -1.010189 |
| H | -4.175724 | 2.374710  | 0.938265  |
| H | -2.769242 | 4.263884  | 1.039012  |
| N | 2.153832  | -1.831822 | 0.348550  |
| H | 1.330430  | -2.595805 | 3.053698  |
| H | 1.815340  | -0.241060 | 3.065489  |

|   |           |           |           |
|---|-----------|-----------|-----------|
| H | 1.344758  | -3.680713 | 0.936887  |
| H | 4.107701  | 2.601038  | -1.003390 |
| H | 2.240637  | 4.023141  | -1.420890 |
| H | 0.237890  | -2.739050 | -1.077330 |
| H | -2.659914 | 4.297088  | -0.717935 |
| H | -4.126369 | 2.436039  | -0.818956 |
| H | -3.372378 | -2.786251 | 0.709421  |
| H | -1.301754 | -3.788448 | 1.314074  |
| N | -0.047869 | 3.742045  | 0.293892  |
| C | -0.134166 | 5.200965  | 0.143600  |
| H | -0.063358 | 5.510047  | -0.904374 |
| H | -1.074254 | 5.561716  | 0.551184  |
| H | 0.667754  | 5.674486  | 0.706665  |
| C | -4.363889 | -0.344444 | -0.192417 |
| C | -4.928467 | -0.686305 | -1.422999 |
| C | -5.239072 | -0.299945 | 0.894145  |
| C | -6.280608 | -0.969793 | -1.573818 |
| C | -6.596309 | -0.574428 | 0.774208  |
| C | -7.119477 | -0.912731 | -0.467570 |
| C | 4.489968  | -0.131585 | 0.055601  |
| C | 5.383445  | -0.744472 | 0.937522  |
| C | 4.890870  | -0.063124 | -1.279234 |
| C | 6.608754  | -1.251472 | 0.529131  |
| C | 6.113222  | -0.559919 | -1.715919 |
| C | 6.976407  | -1.158035 | -0.807897 |
| F | -4.153393 | -0.746216 | -2.517045 |
| F | -6.781555 | -1.289162 | -2.772378 |
| F | -8.421265 | -1.178697 | -0.597610 |
| F | -7.400443 | -0.519308 | 1.842419  |
| F | -4.775577 | 0.015864  | 2.115259  |
| F | 7.440833  | -1.820011 | 1.410174  |
| F | 5.063492  | -0.849583 | 2.237235  |
| F | 8.155237  | -1.636992 | -1.215526 |
| F | 6.459998  | -0.473837 | -3.006501 |
| F | 4.083495  | 0.486527  | -2.201839 |

43

10-O-Corrin

|   |           |           |           |
|---|-----------|-----------|-----------|
| C | -2.131240 | 1.799538  | -0.178546 |
| N | -0.957751 | 1.534734  | 0.239347  |
| C | -2.391990 | 3.197416  | -0.674009 |
| C | -1.055879 | 3.874179  | -0.288137 |
| C | -0.168845 | 2.680914  | 0.085852  |
| C | -2.895572 | -0.425840 | 0.012101  |
| N | -1.907656 | -1.019451 | -0.514564 |
| C | -1.845780 | -2.317505 | 0.044109  |
| C | -3.185631 | -2.642495 | 0.697902  |
| C | -3.782143 | -1.231608 | 0.926304  |
| C | -0.689846 | -2.993796 | 0.145510  |
| C | 0.613902  | -2.472492 | -0.294292 |

|   |           |           |           |
|---|-----------|-----------|-----------|
| C | 0.850256  | -1.691217 | -1.574761 |
| C | 2.382701  | -1.555418 | -1.572506 |
| C | 2.749947  | -1.810381 | -0.089443 |
| C | 2.880482  | -0.517910 | 0.758313  |
| N | 1.714077  | 0.348939  | 0.567157  |
| C | 2.078034  | 1.570446  | 0.449515  |
| C | 3.586151  | 1.793322  | 0.563565  |
| C | 4.128157  | 0.355263  | 0.451560  |
| C | 1.175915  | 2.700126  | 0.204811  |
| H | -4.838961 | -1.137179 | 0.668385  |
| H | -3.815008 | -3.212719 | 0.006740  |
| H | -0.667233 | -3.902087 | 0.738356  |
| H | 0.339397  | -0.731339 | -1.508419 |
| H | 2.718643  | -0.582473 | -1.936952 |
| H | 4.955100  | 0.152958  | 1.134621  |
| H | 3.817830  | 2.251179  | 1.533376  |
| H | 1.662371  | 3.659522  | 0.052588  |
| H | -0.629260 | 4.474099  | -1.092879 |
| H | -2.567818 | 3.186355  | -1.754773 |
| N | 1.641822  | -2.615421 | 0.458569  |
| H | 2.841785  | -2.322272 | -2.202701 |
| H | 0.454386  | -2.221373 | -2.446134 |
| H | 3.686388  | -2.367641 | 0.019827  |
| H | -3.079419 | -3.224959 | 1.613020  |
| H | -3.661649 | -0.885497 | 1.959226  |
| H | 2.880448  | -0.840587 | 1.807535  |
| H | -3.274834 | 3.637104  | -0.205186 |
| H | -1.189976 | 4.530265  | 0.577265  |
| H | 3.969040  | 2.469933  | -0.206046 |
| H | 4.487249  | 0.164378  | -0.564099 |
| O | -3.164204 | 0.910683  | -0.181798 |

63

10-O-PFPh-Corrin

|   |           |           |           |
|---|-----------|-----------|-----------|
| C | -1.191724 | 2.964622  | 0.655314  |
| N | -1.260555 | 1.857093  | 0.029607  |
| C | -2.473230 | 3.544094  | 1.187811  |
| C | -3.490297 | 2.552212  | 0.582497  |
| C | -2.590862 | 1.428441  | 0.056878  |
| C | 1.182005  | 3.074484  | 0.763223  |
| N | 1.389771  | 1.846129  | 1.004803  |
| C | 2.746519  | 1.575952  | 0.740576  |
| C | 3.509404  | 2.890148  | 0.581821  |
| C | 2.367977  | 3.915035  | 0.375690  |
| C | 3.165052  | 0.306893  | 0.565783  |
| C | 2.208753  | -0.836871 | 0.652344  |
| C | 1.286471  | -1.113249 | 1.824910  |
| C | 0.703908  | -2.485856 | 1.435605  |
| C | 0.989655  | -2.571250 | -0.085394 |
| C | -0.188862 | -2.125934 | -0.981237 |

|   |           |           |           |
|---|-----------|-----------|-----------|
| N | -0.808325 | -0.897712 | -0.466825 |
| C | -2.071827 | -0.931965 | -0.656507 |
| C | -2.566815 | -2.216319 | -1.328559 |
| C | -1.345940 | -3.136529 | -1.151616 |
| C | -2.984650 | 0.173447  | -0.279813 |
| H | 2.451353  | 4.812342  | 0.992473  |
| H | 4.066772  | 3.108017  | 1.498186  |
| H | 0.528304  | -0.332481 | 1.876761  |
| H | -0.357832 | -2.571671 | 1.673513  |
| H | -1.191814 | -3.819162 | -1.989080 |
| H | -2.780075 | -2.014247 | -2.386171 |
| H | -4.222063 | 2.194787  | 1.307748  |
| H | -2.469358 | 3.534179  | 2.282613  |
| N | 2.116664  | -1.648056 | -0.329201 |
| H | 1.230183  | -3.290014 | 1.956210  |
| H | 1.837044  | -1.121696 | 2.769849  |
| H | 1.283515  | -3.577556 | -0.400535 |
| H | 4.217442  | 2.879253  | -0.243901 |
| H | 2.275259  | 4.240112  | -0.665783 |
| H | 0.245965  | -1.881389 | -1.959685 |
| H | -2.609120 | 4.580506  | 0.871962  |
| H | -4.041037 | 3.012802  | -0.242631 |
| H | -3.481294 | -2.620511 | -0.891712 |
| H | -1.460567 | -3.738486 | -0.244450 |
| O | -0.045432 | 3.676034  | 0.846236  |
| C | 4.546546  | -0.025380 | 0.131799  |
| C | 5.358666  | -0.844728 | 0.919761  |
| C | 5.078392  | 0.373820  | -1.095386 |
| C | 6.630213  | -1.237951 | 0.527805  |
| C | 6.349676  | -0.002910 | -1.512359 |
| C | 7.129602  | -0.812740 | -0.697630 |
| C | -4.445789 | -0.135619 | -0.229649 |
| C | -4.975842 | -1.001544 | 0.730246  |
| C | -5.357126 | 0.411903  | -1.134800 |
| C | -6.328037 | -1.311917 | 0.793780  |
| C | -6.716406 | 0.122227  | -1.093923 |
| C | -7.204025 | -0.745551 | -0.125162 |
| F | 4.357053  | 1.139465  | -1.930090 |
| F | 6.823253  | 0.401738  | -2.697003 |
| F | 8.353221  | -1.179039 | -1.087462 |
| F | 7.379749  | -2.013258 | 1.319814  |
| F | 4.907312  | -1.273910 | 2.109629  |
| F | -7.554919 | 0.667696  | -1.981323 |
| F | -4.931175 | 1.249522  | -2.093935 |
| F | -8.506077 | -1.031929 | -0.074676 |
| F | -6.794018 | -2.141739 | 1.732870  |
| F | -4.162236 | -1.561548 | 1.639203  |

|   |           |           |           |
|---|-----------|-----------|-----------|
| C | -2.034279 | -1.900293 | 0.201499  |
| N | -0.847245 | -1.546003 | -0.120966 |
| C | -2.240147 | -3.378679 | 0.495636  |
| C | -0.877379 | -3.945905 | 0.051621  |
| C | -0.029915 | -2.687567 | -0.149300 |
| C | -2.877864 | 0.795415  | -0.013286 |
| N | -1.778561 | 1.256701  | 0.437016  |
| C | -1.565394 | 2.532252  | -0.132501 |
| C | -2.858594 | 3.026680  | -0.769040 |
| C | -3.671488 | 1.720974  | -0.921075 |
| C | -0.345784 | 3.092402  | -0.207693 |
| C | 0.892014  | 2.477279  | 0.280950  |
| C | 1.006078  | 1.616665  | 1.526292  |
| C | 2.530050  | 1.432616  | 1.627442  |
| C | 3.007252  | 1.738613  | 0.186459  |
| C | 3.136618  | 0.478993  | -0.709080 |
| N | 1.930457  | -0.350988 | -0.616192 |
| C | 2.247527  | -1.582940 | -0.479100 |
| C | 3.751092  | -1.859320 | -0.499366 |
| C | 4.338422  | -0.442996 | -0.362091 |
| C | 1.310496  | -2.695278 | -0.318011 |
| H | -4.718084 | 1.807764  | -0.619834 |
| H | -3.368725 | 3.721043  | -0.093472 |
| H | -0.224315 | 3.998849  | -0.791678 |
| H | 0.474386  | 0.679471  | 1.364058  |
| H | 2.812248  | 0.435651  | 1.972068  |
| H | 5.194622  | -0.268251 | -1.015946 |
| H | 4.023421  | -2.334804 | -1.449863 |
| H | 1.777718  | -3.676486 | -0.293899 |
| H | -0.439507 | -4.628281 | 0.781441  |
| H | -2.429824 | -3.521307 | 1.564528  |
| N | 1.975840  | 2.617448  | -0.391381 |
| H | 2.964001  | 2.158799  | 2.320630  |
| H | 0.560144  | 2.107275  | 2.396228  |
| H | 3.973027  | 2.254368  | 0.163162  |
| H | -2.691260 | 3.544212  | -1.713950 |
| H | -3.657947 | 1.332038  | -1.945066 |
| H | 3.205840  | 0.842666  | -1.741934 |
| H | -3.092926 | -3.794856 | -0.045221 |
| H | -0.971891 | -4.489626 | -0.893080 |
| H | 4.059986  | -2.542983 | 0.296731  |
| H | 4.670563  | -0.267345 | 0.665136  |
| S | -3.462322 | -0.856986 | 0.316531  |

43

10-Se-Corrin

|   |          |          |           |
|---|----------|----------|-----------|
| C | 1.844014 | 1.740175 | 0.131517  |
| N | 0.630936 | 1.458452 | -0.156135 |
| C | 2.160472 | 3.210334 | 0.361405  |
| C | 0.834321 | 3.856882 | -0.084857 |



|    |           |           |           |
|----|-----------|-----------|-----------|
| C  | -0.104707 | 2.656579  | -0.222180 |
| C  | 2.478200  | -1.198078 | -0.084395 |
| N  | 1.337329  | -1.525893 | 0.374284  |
| C  | 0.965623  | -2.765228 | -0.198950 |
| C  | 2.180092  | -3.401975 | -0.862985 |
| C  | 3.142745  | -2.201387 | -1.012831 |
| C  | -0.310354 | -3.184075 | -0.247504 |
| C  | -1.460945 | -2.443389 | 0.276056  |
| C  | -1.444142 | -1.560864 | 1.511133  |
| C  | -2.939179 | -1.233850 | 1.668017  |
| C  | -3.498451 | -1.507275 | 0.250256  |
| C  | -3.543497 | -0.250196 | -0.655822 |
| N  | -2.266612 | 0.472614  | -0.611054 |
| C  | -2.472805 | 1.728812  | -0.484069 |
| C  | -3.946988 | 2.133937  | -0.464474 |
| C  | -4.648385 | 0.776330  | -0.283040 |
| C  | -1.442549 | 2.761826  | -0.373751 |
| H  | 4.174868  | -2.418193 | -0.727325 |
| H  | 2.612950  | -4.162628 | -0.205089 |
| H  | -0.545870 | -4.068366 | -0.830680 |
| H  | -0.834806 | -0.679255 | 1.313429  |
| H  | -3.113734 | -0.211697 | 2.010184  |
| H  | -5.539796 | 0.666715  | -0.903129 |
| H  | -4.206832 | 2.615386  | -1.415536 |
| H  | -1.828478 | 3.778228  | -0.378522 |
| H  | 0.459105  | 4.597335  | 0.622920  |
| H  | 2.378963  | 3.381991  | 1.420599  |
| N  | -2.578170 | -2.485617 | -0.353979 |
| H  | -3.411439 | -1.909905 | 2.386452  |
| H  | -1.010875 | -2.079527 | 2.370981  |
| H  | -4.508776 | -1.929400 | 0.269967  |
| H  | 1.937209  | -3.881835 | -1.811419 |
| H  | 3.163805  | -1.801510 | -2.032306 |
| H  | -3.676881 | -0.615453 | -1.681820 |
| H  | 3.030507  | 3.542339  | -0.209400 |
| H  | 0.951046  | 4.354486  | -1.052225 |
| H  | -4.170908 | 2.854736  | 0.327231  |
| H  | -4.956024 | 0.644154  | 0.758296  |
| Se | 3.307965  | 0.505122  | 0.283953  |

63

10-Se-PFPh-Corrin

|   |           |          |           |
|---|-----------|----------|-----------|
| C | -1.478270 | 2.913218 | 0.114843  |
| N | -1.388892 | 1.637910 | 0.166151  |
| C | -2.872180 | 3.492509 | -0.056678 |
| C | -3.722815 | 2.210297 | -0.048282 |
| C | -2.677342 | 1.093838 | 0.025091  |
| C | 1.561862  | 3.174970 | 0.124452  |
| N | 1.665720  | 1.991621 | 0.581032  |
| C | 2.953713  | 1.502407 | 0.287668  |

|    |           |           |           |
|----|-----------|-----------|-----------|
| C  | 3.824152  | 2.621817  | -0.273533 |
| C  | 2.804604  | 3.758160  | -0.524635 |
| C  | 3.246704  | 0.195693  | 0.454067  |
| C  | 2.255984  | -0.770654 | 0.990137  |
| C  | 1.315855  | -0.500592 | 2.150785  |
| C  | 0.768241  | -1.912239 | 2.422227  |
| C  | 1.030985  | -2.644354 | 1.083013  |
| C  | -0.173827 | -2.637390 | 0.112667  |
| N  | -0.770215 | -1.298564 | -0.004627 |
| C  | -2.044712 | -1.380024 | 0.042322  |
| C  | -2.588155 | -2.806669 | 0.169194  |
| C  | -1.319255 | -3.597115 | 0.523477  |
| C  | -2.972474 | -0.230106 | -0.039019 |
| H  | 3.092243  | 4.712447  | -0.075545 |
| H  | 4.579225  | 2.916699  | 0.460931  |
| H  | 0.542223  | 0.196434  | 1.830143  |
| H  | -0.284946 | -1.906084 | 2.709446  |
| H  | -1.257437 | -4.559206 | 0.012451  |
| H  | -3.017725 | -3.125839 | -0.787612 |
| H  | -4.386600 | 2.176786  | 0.818683  |
| H  | -3.119346 | 4.184384  | 0.752785  |
| N  | 2.156912  | -1.929191 | 0.457624  |
| H  | 1.330167  | -2.398497 | 3.224117  |
| H  | 1.842282  | -0.058273 | 3.000866  |
| H  | 1.317340  | -3.691230 | 1.227431  |
| H  | 4.344701  | 2.331717  | -1.184819 |
| H  | 2.627486  | 3.940642  | -1.588653 |
| H  | 0.222278  | -2.898347 | -0.876594 |
| H  | -2.946699 | 4.049977  | -0.994559 |
| H  | -4.346267 | 2.121211  | -0.939789 |
| H  | -3.378309 | -2.895870 | 0.918604  |
| H  | -1.283747 | -3.793523 | 1.598843  |
| Se | -0.058965 | 4.205529  | 0.176354  |
| C  | -4.422229 | -0.584912 | -0.195667 |
| C  | -4.945991 | -0.971302 | -1.430124 |
| C  | -5.314601 | -0.564644 | 0.876540  |
| C  | -6.281014 | -1.319097 | -1.598746 |
| C  | -6.655019 | -0.905012 | 0.738633  |
| C  | -7.140066 | -1.285018 | -0.506909 |
| C  | 4.546377  | -0.377148 | 0.014614  |
| C  | 4.950872  | -0.405638 | -1.320229 |
| C  | 5.398818  | -0.992787 | 0.933824  |
| C  | 6.139744  | -1.001590 | -1.723955 |
| C  | 6.590583  | -1.596192 | 0.558851  |
| C  | 6.963420  | -1.600443 | -0.780169 |
| F  | -4.884175 | -0.208613 | 2.098124  |
| F  | -7.478387 | -0.872290 | 1.791835  |
| F  | -8.424643 | -1.613922 | -0.653968 |
| F  | -6.745010 | -1.680591 | -2.799229 |
| F  | -4.147234 | -1.013880 | -2.507240 |

|   |          |           |           |
|---|----------|-----------|-----------|
| F | 5.071594 | -1.004143 | 2.235613  |
| F | 7.385078 | -2.164937 | 1.472980  |
| F | 8.109654 | -2.173626 | -1.155671 |
| F | 6.491723 | -1.008974 | -3.015256 |
| F | 4.179121 | 0.142781  | -2.272834 |

---

51

10-SiMe2-Corrin

|   |           |           |           |
|---|-----------|-----------|-----------|
| C | -1.878481 | 1.705225  | -0.015195 |
| N | -0.601454 | 1.509621  | -0.010819 |
| C | -2.290915 | 3.122134  | 0.381240  |
| C | -0.931956 | 3.840262  | 0.486715  |
| C | 0.070000  | 2.694912  | 0.350557  |
| C | -2.446654 | -1.311845 | 0.184939  |
| N | -1.334900 | -1.744066 | -0.302935 |
| C | -0.855748 | -2.819976 | 0.478025  |
| C | -1.984745 | -3.333802 | 1.355388  |
| C | -2.940312 | -2.118389 | 1.385237  |
| C | 0.449247  | -3.144486 | 0.536573  |
| C | 1.528095  | -2.426333 | -0.142988 |
| C | 1.384963  | -1.609566 | -1.414885 |
| C | 2.849599  | -1.247717 | -1.711392 |
| C | 3.529749  | -1.427648 | -0.333471 |
| C | 3.614151  | -0.129302 | 0.505438  |
| N | 2.311665  | 0.549221  | 0.596168  |
| C | 2.464421  | 1.810868  | 0.453021  |
| C | 3.912844  | 2.261040  | 0.260089  |
| C | 4.623499  | 0.925550  | -0.020033 |
| C | 1.401248  | 2.816540  | 0.534143  |
| H | -3.998262 | -2.381474 | 1.308402  |
| H | -2.474233 | -4.191464 | 0.880582  |
| H | 0.772956  | -3.881264 | 1.264327  |
| H | 0.769026  | -0.733881 | -1.209232 |
| H | 2.959765  | -0.240834 | -2.119754 |
| H | 5.597488  | 0.845309  | 0.466099  |
| H | 4.271967  | 2.740419  | 1.179827  |
| H | 1.756165  | 3.820202  | 0.758563  |
| H | -0.801151 | 4.562622  | -0.324370 |
| H | -2.966602 | 3.568867  | -0.354464 |
| N | 2.694375  | -2.397202 | 0.396177  |
| H | 3.286370  | -1.946536 | -2.430663 |
| H | 0.896026  | -2.177543 | -2.210409 |
| H | 4.548247  | -1.822178 | -0.417279 |
| H | -1.642933 | -3.648545 | 2.341610  |
| H | -2.822368 | -1.530128 | 2.304288  |
| H | 3.876469  | -0.443233 | 1.524147  |
| H | -2.835571 | 3.105330  | 1.332257  |
| H | -0.805379 | 4.380471  | 1.426591  |
| H | 4.019090  | 2.995634  | -0.543109 |
| H | 4.781394  | 0.799241  | -1.094940 |

|    |           |           |           |
|----|-----------|-----------|-----------|
| Si | -3.093082 | 0.318400  | -0.534533 |
| C  | -3.118662 | 0.220783  | -2.412684 |
| C  | -4.800642 | 0.721565  | 0.161493  |
| H  | -3.839852 | -0.527224 | -2.754938 |
| H  | -3.389162 | 1.181886  | -2.859927 |
| H  | -2.130427 | -0.066008 | -2.778691 |
| H  | -5.526926 | -0.044370 | -0.127293 |
| H  | -4.794298 | 0.775653  | 1.254269  |
| H  | -5.170645 | 1.679545  | -0.215840 |

---

71

10-SiMe2-PFPh-Corrin

|   |           |           |           |
|---|-----------|-----------|-----------|
| C | -1.496547 | 3.055361  | 0.238849  |
| N | -1.860745 | 2.106170  | -0.556362 |
| C | -2.293846 | 3.100057  | 1.537597  |
| C | -3.461215 | 2.139686  | 1.215291  |
| C | -2.907605 | 1.368363  | 0.030924  |
| C | 1.570196  | 3.142218  | 0.045838  |
| N | 1.574541  | 1.872506  | -0.178368 |
| C | 2.853322  | 1.337483  | 0.077567  |
| C | 3.770954  | 2.415840  | 0.639814  |
| C | 2.920050  | 3.696449  | 0.493427  |
| C | 3.136609  | 0.043748  | -0.168026 |
| C | 2.130332  | -0.898939 | -0.745440 |
| C | 1.447686  | -1.943701 | 0.122811  |
| C | 0.702926  | -2.789496 | -0.926808 |
| C | 0.743317  | -1.902446 | -2.203350 |
| C | -0.577901 | -1.188934 | -2.538856 |
| N | -1.143450 | -0.522875 | -1.359661 |
| C | -2.416702 | -0.571988 | -1.410119 |
| C | -2.981243 | -1.352327 | -2.593432 |
| C | -1.717671 | -2.071505 | -3.104988 |
| C | -3.248450 | 0.129589  | -0.403571 |
| H | 2.835943  | 4.270593  | 1.420465  |
| H | 4.006149  | 2.215804  | 1.688100  |
| H | 0.767686  | -1.434699 | 0.813125  |
| H | -0.314027 | -3.031321 | -0.615032 |
| H | -1.681114 | -2.162956 | -4.191924 |
| H | -3.386101 | -0.648736 | -3.331986 |
| H | -3.739179 | 1.489789  | 2.046058  |
| H | -1.681022 | 2.729765  | 2.369025  |
| N | 1.784908  | -0.881526 | -1.968947 |
| H | 1.228784  | -3.730420 | -1.105861 |
| H | 2.158153  | -2.518084 | 0.724889  |
| H | 1.034386  | -2.478936 | -3.087955 |
| H | 4.716092  | 2.468567  | 0.096198  |
| H | 3.319664  | 4.381867  | -0.262933 |
| H | -0.324787 | -0.395127 | -3.254047 |
| H | -2.612133 | 4.111548  | 1.800797  |
| H | -4.350903 | 2.705657  | 0.922327  |

|    |           |           |           |
|----|-----------|-----------|-----------|
| H  | -3.795467 | -2.027626 | -2.318852 |
| H  | -1.662095 | -3.079351 | -2.681769 |
| Si | -0.024632 | 4.139069  | -0.285968 |
| C  | 0.011409  | 5.722534  | 0.739645  |
| C  | -0.139985 | 4.497173  | -2.126031 |
| H  | 0.870244  | 6.345566  | 0.472041  |
| H  | -0.889083 | 6.320114  | 0.568199  |
| H  | 0.074034  | 5.515975  | 1.812289  |
| H  | 0.737918  | 5.044206  | -2.481967 |
| H  | -0.209641 | 3.556189  | -2.675787 |
| H  | -1.027732 | 5.094108  | -2.354269 |
| C  | -4.432195 | -0.578238 | 0.145290  |
| C  | -4.333479 | -1.872493 | 0.671309  |
| C  | -5.715626 | -0.019740 | 0.141368  |
| C  | -5.427718 | -2.565933 | 1.170576  |
| C  | -6.826690 | -0.689906 | 0.639198  |
| C  | -6.683555 | -1.970706 | 1.156318  |
| C  | 4.458332  | -0.538225 | 0.198055  |
| C  | 5.330384  | -1.047652 | -0.770902 |
| C  | 4.883052  | -0.643398 | 1.525791  |
| C  | 6.553083  | -1.621282 | -0.442296 |
| C  | 6.100970  | -1.210705 | 1.879837  |
| C  | 6.940437  | -1.704027 | 0.889463  |
| F  | -5.919636 | 1.201277  | -0.378732 |
| F  | -8.034361 | -0.115609 | 0.609675  |
| F  | -7.742833 | -2.624661 | 1.636563  |
| F  | -5.280377 | -3.795213 | 1.675858  |
| F  | -3.139064 | -2.481473 | 0.723468  |
| F  | 4.097496  | -0.198544 | 2.521453  |
| F  | 5.011091  | -0.968698 | -2.066424 |
| F  | 7.365141  | -2.083827 | -1.399048 |
| F  | 8.113358  | -2.251767 | 1.215114  |
| F  | 6.465461  | -1.293771 | 3.164840  |

---

63

10-S-PFPh-Corrin

|   |           |           |           |
|---|-----------|-----------|-----------|
| C | -1.398770 | 3.096957  | 0.210417  |
| N | -1.339682 | 1.817019  | 0.189999  |
| C | -2.784437 | 3.715127  | 0.123940  |
| C | -3.662749 | 2.452303  | 0.072946  |
| C | -2.641133 | 1.311296  | 0.063894  |
| C | 1.457268  | 3.326358  | 0.226272  |
| N | 1.592359  | 2.134239  | 0.656376  |
| C | 2.896899  | 1.693703  | 0.367065  |
| C | 3.744639  | 2.859651  | -0.130581 |
| C | 2.692424  | 3.963379  | -0.387196 |
| C | 3.219107  | 0.387896  | 0.479781  |
| C | 2.237397  | -0.623026 | 0.949770  |
| C | 1.296291  | -0.438738 | 2.126095  |
| C | 0.750063  | -1.866913 | 2.295194  |

|   |           |           |           |
|---|-----------|-----------|-----------|
| C | 1.021093  | -2.504401 | 0.909795  |
| C | -0.180732 | -2.435042 | -0.062899 |
| N | -0.770050 | -1.089677 | -0.096819 |
| C | -2.045112 | -1.165150 | -0.053306 |
| C | -2.597486 | -2.593403 | -0.015022 |
| C | -1.332245 | -3.413911 | 0.282735  |
| C | -2.961714 | -0.003386 | -0.055780 |
| H | 2.936178  | 4.921025  | 0.079724  |
| H | 4.457617  | 3.161417  | 0.642400  |
| H | 0.522751  | 0.279231  | 1.855511  |
| H | -0.304703 | -1.882369 | 2.576122  |
| H | -1.277052 | -4.338720 | -0.293675 |
| H | -3.033491 | -2.847980 | -0.988119 |
| H | -4.315820 | 2.383137  | 0.945683  |
| H | -2.988478 | 4.352040  | 0.988526  |
| N | 2.145507  | -1.742281 | 0.338531  |
| H | 1.308167  | -2.406784 | 3.064745  |
| H | 1.822605  | -0.058913 | 3.006041  |
| H | 1.311794  | -3.557414 | 0.983233  |
| H | 4.311742  | 2.617190  | -1.027620 |
| H | 2.530413  | 4.153102  | -1.452559 |
| H | 0.218822  | -2.635468 | -1.064785 |
| H | -2.877237 | 4.339964  | -0.768594 |
| H | -4.299824 | 2.427732  | -0.813274 |
| H | -3.384961 | -2.725127 | 0.730985  |
| H | -1.297350 | -3.684845 | 1.341768  |
| S | -0.056976 | 4.250533  | 0.268284  |
| C | -4.419529 | -0.329707 | -0.191882 |
| C | -4.979948 | -0.651100 | -1.428940 |
| C | -5.284682 | -0.345979 | 0.902553  |
| C | -6.323856 | -0.971965 | -1.579078 |
| C | -6.633219 | -0.660502 | 0.783520  |
| C | -7.154880 | -0.975942 | -0.465237 |
| C | 4.538036  | -0.137047 | 0.039057  |
| C | 5.384520  | -0.780919 | 0.944447  |
| C | 4.968760  | -0.093240 | -1.287267 |
| C | 6.595302  | -1.342391 | 0.565325  |
| C | 6.177072  | -0.645975 | -1.694797 |
| C | 6.994182  | -1.274147 | -0.764430 |
| F | -4.818694 | -0.052665 | 2.127769  |
| F | -7.429597 | -0.664343 | 1.857788  |
| F | -8.447615 | -1.279518 | -0.594285 |
| F | -6.823113 | -1.270979 | -2.782632 |
| F | -4.209147 | -0.654905 | -2.527181 |
| F | 5.031745  | -0.862276 | 2.237139  |
| F | 7.382968  | -1.939797 | 1.466934  |
| F | 8.158767  | -1.806273 | -1.143720 |
| F | 6.554069  | -0.584064 | -2.977501 |
| F | 4.204856  | 0.485535  | -2.228048 |

---

44

21-O-Corrin

|   |           |           |           |
|---|-----------|-----------|-----------|
| C | -3.027938 | 0.157782  | -0.018570 |
| N | -2.017309 | 0.869660  | -0.400036 |
| C | -4.094826 | 0.958004  | 0.727129  |
| C | -3.535428 | 2.396157  | 0.643393  |
| C | -2.125740 | 2.162571  | 0.112084  |
| C | -3.084255 | -1.279678 | -0.182615 |
| C | -1.992541 | -2.093969 | -0.196964 |
| N | -0.691171 | -1.652393 | -0.021598 |
| C | 0.131239  | -2.661912 | -0.046957 |
| C | -0.546131 | -4.006039 | -0.295588 |
| C | -2.035972 | -3.616379 | -0.337125 |
| C | 1.552114  | -2.565770 | 0.149325  |
| C | 2.286903  | -1.445117 | 0.392439  |
| C | 3.780019  | -1.401548 | 0.635461  |
| C | 4.121938  | 0.069921  | 0.354143  |
| C | 2.815556  | 0.788736  | 0.708262  |
| C | 2.491151  | 2.064990  | -0.080064 |
| N | 1.326790  | 2.726897  | 0.536330  |
| C | 0.296033  | 2.534656  | -0.206735 |
| C | 0.573764  | 1.815345  | -1.518048 |
| C | 2.109945  | 1.817939  | -1.561041 |
| C | -1.042505 | 2.960107  | 0.225406  |
| H | -2.523365 | -3.910934 | -1.269334 |
| H | -0.195821 | -4.446554 | -1.234729 |
| H | 2.112533  | -3.493005 | 0.110735  |
| H | 4.322889  | -2.113850 | 0.013407  |
| H | 4.361747  | 0.212480  | -0.702928 |
| H | 2.484326  | 2.641913  | -2.174166 |
| H | 0.108570  | 2.332367  | -2.361493 |
| H | -1.108002 | 3.885588  | 0.786781  |
| H | -4.106546 | 3.003728  | -0.065802 |
| H | -5.081984 | 0.841754  | 0.270444  |
| H | -4.066064 | -1.743984 | -0.198670 |
| H | 4.960581  | 0.437606  | 0.946538  |
| H | 3.979608  | -1.656070 | 1.682980  |
| H | 2.765698  | 1.022244  | 1.776248  |
| H | -0.305365 | -4.719221 | 0.498344  |
| H | -2.603142 | -4.069207 | 0.480529  |
| H | 3.368700  | 2.714036  | 0.023649  |
| H | -4.177460 | 0.603387  | 1.760353  |
| H | -3.541159 | 2.918962  | 1.601093  |
| H | 0.145320  | 0.814695  | -1.467071 |
| H | 2.521631  | 0.891630  | -1.967079 |
| O | 1.776147  | -0.213936 | 0.457961  |

\*\*\*\*\*

74

21-O-PFPh-Corrin

|   |           |          |          |
|---|-----------|----------|----------|
| C | -1.037801 | 1.742054 | 0.024755 |
|---|-----------|----------|----------|

|   |           |           |           |
|---|-----------|-----------|-----------|
| N | -1.468251 | 0.704283  | -0.611710 |
| C | -1.903042 | 2.150820  | 1.211054  |
| C | -3.107586 | 1.203206  | 1.059634  |
| C | -2.608658 | 0.207582  | 0.020410  |
| C | 0.206647  | 2.443493  | -0.324217 |
| C | 1.356255  | 1.787130  | -0.649315 |
| N | 1.465419  | 0.402029  | -0.599053 |
| C | 2.690672  | 0.050155  | -0.817915 |
| C | 3.639413  | 1.204721  | -1.089621 |
| C | 2.694159  | 2.419366  | -1.024577 |
| C | 3.110382  | -1.359774 | -0.723915 |
| C | 2.382725  | -2.357009 | -1.299783 |
| C | 2.392738  | -3.836076 | -1.012460 |
| C | 0.923073  | -4.197479 | -1.313052 |
| C | 0.583718  | -3.241655 | -2.459023 |
| C | -0.823447 | -2.666237 | -2.543384 |
| N | -1.180081 | -1.943803 | -1.323692 |
| C | -2.452896 | -1.915893 | -1.222949 |
| C | -3.181844 | -2.784154 | -2.250576 |
| C | -2.010525 | -3.612652 | -2.821984 |
| C | -3.130163 | -1.019330 | -0.266042 |
| H | 3.020264  | 3.157906  | -0.292008 |
| H | 4.437782  | 1.250800  | -0.343434 |
| H | 2.704978  | -4.066067 | 0.005729  |
| H | 0.292728  | -3.977081 | -0.448468 |
| H | -2.129371 | -3.863009 | -3.877837 |
| H | -3.640863 | -2.145885 | -3.016690 |
| H | -3.395303 | 0.715782  | 1.992771  |
| H | -1.356165 | 1.983995  | 2.145863  |
| H | 0.794103  | -5.244207 | -1.590524 |
| H | 3.068634  | -4.350818 | -1.703940 |
| H | 0.865229  | -3.670878 | -3.427543 |
| H | 4.124051  | 1.082705  | -2.062822 |
| H | 2.615054  | 2.928495  | -1.989109 |
| H | -0.777456 | -1.911703 | -3.342882 |
| H | -2.172975 | 3.208959  | 1.184674  |
| H | -3.983899 | 1.737934  | 0.683865  |
| H | -3.980892 | -3.390208 | -1.818047 |
| H | -1.900746 | -4.544502 | -2.258139 |
| O | 1.466616  | -2.093234 | -2.238306 |
| C | 0.188177  | 3.931759  | -0.224237 |
| C | 0.916810  | 4.640321  | 0.735070  |
| C | -0.608459 | 4.698415  | -1.080878 |
| C | 0.876154  | 6.026091  | 0.831926  |
| C | -0.671366 | 6.084218  | -1.004391 |
| C | 0.077843  | 6.752089  | -0.043191 |
| C | -4.393616 | -1.485018 | 0.359216  |
| C | -4.446100 | -2.692086 | 1.067394  |
| C | -5.602196 | -0.787445 | 0.257786  |
| C | -5.610946 | -3.172589 | 1.649897  |



|   |           |           |           |
|---|-----------|-----------|-----------|
| C | -6.781431 | -1.241646 | 0.836876  |
| C | -6.787301 | -2.440966 | 1.536840  |
| F | 1.683789  | 3.981799  | 1.619311  |
| F | 1.589548  | 6.663846  | 1.766230  |
| F | 0.028852  | 8.082722  | 0.040471  |
| F | -1.438340 | 6.779101  | -1.850764 |
| F | -1.341145 | 4.092409  | -2.025717 |
| F | -3.331148 | -3.425621 | 1.213347  |
| F | -5.607364 | -4.325727 | 2.327873  |
| F | -7.913775 | -2.888987 | 2.095032  |
| F | -7.913438 | -0.540492 | 0.709715  |
| F | -5.664836 | 0.356705  | -0.442632 |
| C | 4.316801  | -1.680502 | 0.072495  |
| C | 5.346887  | -2.499908 | -0.408645 |
| C | 4.515193  | -1.154375 | 1.357266  |
| C | 6.482987  | -2.795881 | 0.334428  |
| C | 5.646332  | -1.423942 | 2.115413  |
| C | 6.636855  | -2.253881 | 1.603615  |
| F | 3.578008  | -0.365254 | 1.904855  |
| F | 5.781462  | -0.905676 | 3.340580  |
| F | 7.725297  | -2.527516 | 2.325677  |
| F | 7.438012  | -3.583552 | -0.172756 |
| F | 5.274371  | -3.019475 | -1.646482 |

44

22-O-Corrin

|   |           |           |           |
|---|-----------|-----------|-----------|
| C | 2.182354  | -1.928708 | -0.297526 |
| C | 2.307532  | -3.407661 | -0.571514 |
| C | 0.992394  | -3.969234 | -0.004002 |
| C | 0.097045  | -2.749808 | 0.042367  |
| C | 3.158135  | -1.001480 | -0.242933 |
| C | 2.952451  | 0.418210  | -0.009070 |
| N | 1.852365  | 1.014634  | -0.320179 |
| C | 1.865279  | 2.328351  | 0.162821  |
| C | 3.261186  | 2.683916  | 0.667599  |
| C | 3.970355  | 1.310323  | 0.692819  |
| C | 0.733318  | 3.053506  | 0.246465  |
| C | -0.575328 | 2.541216  | -0.194364 |
| C | -0.801332 | 1.832397  | -1.520727 |
| C | -2.332507 | 1.698846  | -1.543899 |
| C | -2.714156 | 1.875569  | -0.053667 |
| C | -2.865598 | 0.543048  | 0.719083  |
| N | -1.714042 | -0.345877 | 0.507953  |
| C | -2.112409 | -1.555606 | 0.382383  |
| C | -3.625665 | -1.742067 | 0.477831  |
| C | -4.125174 | -0.290361 | 0.364396  |
| C | -1.234507 | -2.714654 | 0.222355  |
| H | 4.936078  | 1.306611  | 0.178512  |
| H | 3.751856  | 3.371230  | -0.028118 |
| H | 0.741138  | 4.004682  | 0.768196  |

|   |           |           |           |
|---|-----------|-----------|-----------|
| H | -0.287934 | 0.871938  | -1.501823 |
| H | -2.666045 | 0.746436  | -1.961715 |
| H | -4.968133 | -0.071410 | 1.022322  |
| H | -3.880383 | -2.195243 | 1.444389  |
| H | -1.714902 | -3.685969 | 0.281003  |
| H | 0.565192  | -4.773580 | -0.602689 |
| H | 2.364084  | -3.566876 | -1.653838 |
| H | 4.176464  | -1.363045 | -0.336977 |
| N | -1.610570 | 2.643614  | 0.553889  |
| H | -2.785048 | 2.497885  | -2.137883 |
| H | -0.396249 | 2.413124  | -2.354891 |
| H | -3.649998 | 2.430170  | 0.074644  |
| H | 3.237070  | 3.170482  | 1.643993  |
| H | 4.151153  | 0.949253  | 1.711217  |
| H | -2.868120 | 0.809850  | 1.784129  |
| H | 3.202752  | -3.839061 | -0.124069 |
| H | 1.137726  | -4.350003 | 1.012277  |
| H | -4.015734 | -2.406824 | -0.298290 |
| H | -4.443339 | -0.079562 | -0.660908 |
| O | 0.864733  | -1.622689 | -0.086702 |

74

22-O-PFPh-Corrin

|   |           |           |           |
|---|-----------|-----------|-----------|
| C | -1.292988 | 1.744966  | 0.141619  |
| C | -2.702259 | 2.266013  | 0.275693  |
| C | -3.555710 | 1.063291  | -0.148492 |
| C | -2.597320 | -0.098167 | -0.022490 |
| C | -0.145400 | 2.464627  | 0.095166  |
| C | 1.198067  | 1.893615  | 0.009118  |
| N | 1.453813  | 0.672107  | 0.333214  |
| C | 2.793733  | 0.377184  | 0.073327  |
| C | 3.511721  | 1.599049  | -0.487212 |
| C | 2.407349  | 2.678158  | -0.483233 |
| C | 3.268302  | -0.870813 | 0.291255  |
| C | 2.376174  | -1.927968 | 0.843665  |
| C | 1.560708  | -1.777875 | 2.115578  |
| C | 1.018256  | -3.205878 | 2.300061  |
| C | 1.192746  | -3.829359 | 0.892221  |
| C | -0.073728 | -3.776551 | 0.009893  |
| N | -0.692394 | -2.440082 | 0.004255  |
| C | -1.964769 | -2.554543 | 0.029405  |
| C | -2.478084 | -3.995062 | 0.071689  |
| C | -1.192785 | -4.767116 | 0.410819  |
| C | -2.901033 | -1.413334 | -0.032531 |
| H | 2.636375  | 3.509224  | 0.190623  |
| H | 4.369513  | 1.874583  | 0.130623  |
| H | 0.774585  | -1.042050 | 1.950617  |
| H | -0.016640 | -3.219895 | 2.647766  |
| H | -1.113280 | -5.721077 | -0.112742 |
| H | -2.880047 | -4.274420 | -0.909947 |

|   |           |           |           |
|---|-----------|-----------|-----------|
| H | -4.448286 | 0.935194  | 0.461883  |
| H | -2.886403 | 2.532645  | 1.322098  |
| N | 2.248340  | -3.040640 | 0.230896  |
| H | 1.619882  | -3.758369 | 3.026131  |
| H | 2.182464  | -1.433300 | 2.946351  |
| H | 1.508538  | -4.876783 | 0.936881  |
| H | 3.881715  | 1.411912  | -1.495915 |
| H | 2.228513  | 3.110676  | -1.471806 |
| H | 0.261179  | -3.968077 | -1.017729 |
| H | -2.882974 | 3.153080  | -0.327998 |
| H | -3.877139 | 1.158029  | -1.190895 |
| H | -3.279587 | -4.143440 | 0.798947  |
| H | -1.150259 | -4.973308 | 1.484343  |
| O | -1.315723 | 0.381034  | 0.077499  |
| C | -0.253104 | 3.956057  | 0.115772  |
| C | 0.102560  | 4.689787  | 1.249568  |
| C | -0.666126 | 4.692413  | -0.996248 |
| C | 0.048928  | 6.077923  | 1.286414  |
| C | -0.733331 | 6.080561  | -0.987481 |
| C | -0.372495 | 6.776059  | 0.160629  |
| C | 4.641592  | -1.284725 | -0.081817 |
| C | 5.499353  | -1.843604 | 0.871133  |
| C | 5.136306  | -1.215235 | -1.386308 |
| C | 6.774064  | -2.293578 | 0.561078  |
| C | 6.410676  | -1.655668 | -1.724493 |
| C | 7.234117  | -2.197786 | -0.747243 |
| C | -4.357338 | -1.748955 | -0.153058 |
| C | -4.955575 | -1.971970 | -1.393622 |
| C | -5.177465 | -1.884111 | 0.967804  |
| C | -6.297862 | -2.310146 | -1.522569 |
| C | -6.522386 | -2.220008 | 0.870063  |
| C | -7.084105 | -2.434739 | -0.383340 |
| F | -0.431725 | 8.107197  | 0.182299  |
| F | 0.393011  | 6.743676  | 2.391926  |
| F | -1.136750 | 6.749119  | -2.071517 |
| F | -1.019600 | 4.057281  | -2.124896 |
| F | 0.513148  | 4.048020  | 2.352652  |
| F | 7.566172  | -2.807164 | 1.509454  |
| F | 8.460719  | -2.622992 | -1.060633 |
| F | 5.093079  | -1.943912 | 2.147436  |
| F | 4.369966  | -0.732666 | -2.377851 |
| F | 6.843371  | -1.573345 | -2.988420 |
| F | -4.668279 | -1.685565 | 2.193594  |
| F | -4.226704 | -1.860585 | -2.513767 |
| F | -6.836603 | -2.513263 | -2.728154 |
| F | -8.373251 | -2.756606 | -0.491925 |
| F | -7.277157 | -2.337823 | 1.966608  |

|   |           |           |           |
|---|-----------|-----------|-----------|
| C | 1.820536  | -2.130767 | -0.341310 |
| C | 1.489953  | -3.585469 | -0.572449 |
| C | 0.132767  | -3.878731 | 0.104593  |
| C | -0.681132 | -2.603286 | 0.108984  |
| C | 3.051227  | -1.554551 | -0.301116 |
| C | 3.196577  | -0.126458 | -0.078785 |
| N | 2.201505  | 0.663398  | -0.331034 |
| C | 2.407998  | 1.928540  | 0.222098  |
| C | 3.852091  | 2.032975  | 0.711138  |
| C | 4.363050  | 0.571273  | 0.607326  |
| C | 1.390547  | 2.801217  | 0.373421  |
| C | 0.010038  | 2.547463  | -0.100813 |
| C | -0.309055 | 2.101575  | -1.519854 |
| C | -1.849731 | 2.071192  | -1.525713 |
| C | -2.238650 | 2.304463  | -0.037514 |
| C | -2.842612 | 1.069939  | 0.675944  |
| N | -1.982346 | -0.103659 | 0.541002  |
| C | -2.673507 | -1.173868 | 0.389094  |
| C | -4.178534 | -0.935573 | 0.377206  |
| C | -4.242108 | 0.599487  | 0.195391  |
| C | -2.019784 | -2.476874 | 0.268238  |
| H | 5.287538  | 0.477015  | 0.030134  |
| H | 4.424374  | 2.701779  | 0.062066  |
| H | 1.547862  | 3.705352  | 0.952433  |
| H | 0.146090  | 1.133824  | -1.726093 |
| H | -2.231540 | 1.121573  | -1.905574 |
| H | -5.057239 | 1.064738  | 0.752757  |
| H | -4.613849 | -1.254994 | 1.332386  |
| H | -2.635662 | -3.369313 | 0.327971  |
| H | -0.401268 | -4.698957 | -0.381017 |
| H | 1.400979  | -3.741097 | -1.654611 |
| H | 3.938650  | -2.177193 | -0.362384 |
| N | -1.004212 | 2.717343  | 0.661420  |
| H | -2.258707 | 2.864348  | -2.155623 |
| H | 0.108381  | 2.814384  | -2.238431 |
| H | -2.970856 | 3.113858  | 0.065283  |
| H | 3.916820  | 2.430756  | 1.725405  |
| H | 4.553169  | 0.122192  | 1.587696  |
| H | -2.871758 | 1.325351  | 1.743732  |
| H | 2.283231  | -4.246083 | -0.214011 |
| H | 0.301595  | -4.173813 | 1.147128  |
| H | -4.689698 | -1.494635 | -0.411049 |
| H | -4.380843 | 0.843465  | -0.862247 |
| S | 0.351255  | -1.179838 | -0.078184 |

74

22-S-PFPh-Corrin

|   |           |          |           |
|---|-----------|----------|-----------|
| C | -1.002262 | 1.726046 | 0.177833  |
| C | -2.465508 | 2.088274 | 0.240689  |
| C | -3.278738 | 0.920548 | -0.351761 |

|   |           |           |           |
|---|-----------|-----------|-----------|
| C | -2.496772 | -0.354936 | -0.147416 |
| C | 0.056420  | 2.591322  | 0.190079  |
| C | 1.426426  | 2.089949  | 0.168407  |
| N | 1.647754  | 0.843623  | 0.441166  |
| C | 2.973263  | 0.496948  | 0.203100  |
| C | 3.751312  | 1.730425  | -0.246417 |
| C | 2.683458  | 2.855298  | -0.211366 |
| C | 3.367674  | -0.792381 | 0.344612  |
| C | 2.419393  | -1.831767 | 0.863423  |
| C | 1.745207  | -1.729730 | 2.220785  |
| C | 0.957319  | -3.053043 | 2.302776  |
| C | 1.183369  | -3.721839 | 0.914173  |
| C | -0.091198 | -3.885522 | 0.053532  |
| N | -0.807452 | -2.618786 | -0.092968 |
| C | -2.074003 | -2.785081 | -0.009764 |
| C | -2.495073 | -4.235139 | 0.197682  |
| C | -1.148699 | -4.888498 | 0.586959  |
| C | -2.977606 | -1.626666 | -0.145916 |
| H | 2.909255  | 3.625379  | 0.533140  |
| H | 4.593030  | 1.931439  | 0.420251  |
| H | 1.112825  | -0.843651 | 2.270400  |
| H | -0.101285 | -2.873120 | 2.497813  |
| H | -1.024442 | -5.889299 | 0.170555  |
| H | -2.895403 | -4.642644 | -0.738505 |
| H | -4.278346 | 0.861694  | 0.083664  |
| H | -2.729927 | 2.226987  | 1.296188  |
| N | 2.168675  | -2.889092 | 0.195398  |
| H | 1.334759  | -3.690200 | 3.104521  |
| H | 2.503049  | -1.635434 | 3.003920  |
| H | 1.616169  | -4.723480 | 1.018602  |
| H | 4.153992  | 1.601903  | -1.251796 |
| H | 2.572614  | 3.361069  | -1.173121 |
| H | 0.250775  | -4.176598 | -0.947741 |
| H | -2.676715 | 3.030551  | -0.269202 |
| H | -3.404597 | 1.068915  | -1.430792 |
| H | -3.267800 | -4.354277 | 0.959121  |
| H | -1.078214 | -4.970873 | 1.675350  |
| S | -0.771438 | -0.025375 | 0.083955  |
| C | -0.171722 | 4.067689  | 0.208712  |
| C | -0.534657 | 4.736900  | 1.379027  |
| C | -0.025651 | 4.852559  | -0.936409 |
| C | -0.743278 | 6.110588  | 1.416993  |
| C | -0.221947 | 6.228250  | -0.927200 |
| C | -0.583627 | 6.859597  | 0.257185  |
| C | 4.717735  | -1.260780 | -0.047776 |
| C | 5.531428  | -1.949112 | 0.858431  |
| C | 5.230819  | -1.113318 | -1.339602 |
| C | 6.779598  | -2.449039 | 0.518607  |
| C | 6.479639  | -1.601053 | -1.706743 |
| C | 7.258665  | -2.272657 | -0.774393 |

|   |           |           |           |
|---|-----------|-----------|-----------|
| C | -4.441419 | -1.875516 | -0.304337 |
| C | -5.085476 | -1.731341 | -1.534708 |
| C | -5.239618 | -2.271350 | 0.770687  |
| C | -6.446358 | -1.965439 | -1.695153 |
| C | -6.600573 | -2.517397 | 0.639149  |
| C | -7.206755 | -2.363072 | -0.602195 |
| F | -0.778852 | 8.178169  | 0.279855  |
| F | -1.090832 | 6.715222  | 2.556727  |
| F | -0.074278 | 6.944854  | -2.045116 |
| F | 0.309285  | 4.275332  | -2.101264 |
| F | -0.693895 | 4.048250  | 2.519375  |
| F | 5.108573  | -2.129481 | 2.121155  |
| F | 7.528623  | -3.087051 | 1.425159  |
| F | 8.459921  | -2.744783 | -1.115834 |
| F | 6.929123  | -1.440235 | -2.956671 |
| F | 4.505956  | -0.504304 | -2.291647 |
| F | -4.385553 | -1.354021 | -2.615415 |
| F | -7.026435 | -1.816039 | -2.889882 |
| F | -8.513038 | -2.592010 | -0.742435 |
| F | -7.330596 | -2.891484 | 1.694426  |
| F | -4.691809 | -2.416962 | 1.988130  |

45

Corrin

|   |           |           |           |
|---|-----------|-----------|-----------|
| C | -1.691773 | 2.312280  | -0.126810 |
| N | -0.415124 | 1.827997  | -0.020142 |
| C | -1.684748 | 3.833071  | -0.288028 |
| C | -0.181611 | 4.169731  | -0.347891 |
| C | 0.464126  | 2.812076  | -0.112760 |
| C | -2.826128 | 1.549823  | -0.067728 |
| C | -2.890296 | 0.122063  | 0.078360  |
| N | -1.874540 | -0.688736 | -0.002822 |
| C | -2.286393 | -2.002644 | 0.225099  |
| C | -3.775883 | -2.055987 | 0.550299  |
| C | -4.215342 | -0.590655 | 0.345648  |
| C | -1.400769 | -3.014945 | 0.181839  |
| C | 0.013333  | -2.733921 | -0.158563 |
| C | 0.427801  | -2.340043 | -1.569024 |
| C | 1.956692  | -2.205570 | -1.445153 |
| C | 2.205639  | -2.278404 | 0.088332  |
| C | 2.602775  | -0.946590 | 0.753615  |
| N | 1.753459  | 0.192719  | 0.368620  |
| C | 2.410852  | 1.352483  | 0.254108  |
| C | 3.884885  | 1.099607  | 0.491976  |
| C | 4.009839  | -0.431998 | 0.392160  |
| C | 1.852545  | 2.599074  | 0.005585  |
| H | 0.727697  | 0.192260  | 0.338030  |
| H | -4.888660 | -0.468311 | -0.509694 |
| H | -4.307671 | -2.754774 | -0.098772 |
| H | -1.691824 | -4.030360 | 0.427012  |

|   |           |           |           |
|---|-----------|-----------|-----------|
| H | -0.073835 | -1.408573 | -1.842654 |
| H | 2.323952  | -1.275271 | -1.882722 |
| H | 4.775769  | -0.843702 | 1.050435  |
| H | 4.143273  | 1.456261  | 1.495643  |
| H | 2.523855  | 3.444603  | -0.075076 |
| H | 0.122071  | 4.573976  | -1.318489 |
| H | -2.223802 | 4.137535  | -1.188125 |
| H | -3.777217 | 2.071617  | -0.106727 |
| N | 0.954326  | -2.753278 | 0.704804  |
| H | 2.466495  | -3.029581 | -1.948776 |
| H | 0.116153  | -3.100765 | -2.290963 |
| H | 3.004350  | -2.986362 | 0.337138  |
| H | -3.934436 | -2.384450 | 1.580891  |
| H | -4.726268 | -0.166244 | 1.214441  |
| H | 2.516813  | -1.100544 | 1.836492  |
| H | -2.179780 | 4.312191  | 0.561148  |
| H | 0.131334  | 4.892522  | 0.410429  |
| H | 4.514376  | 1.641359  | -0.216138 |
| H | 4.257237  | -0.721014 | -0.633125 |

\*\*\*\*\*

45

N1-Con-Corrin

|   |           |           |           |
|---|-----------|-----------|-----------|
| C | 2.759803  | -1.198149 | -0.103392 |
| C | 3.509500  | -2.520390 | 0.036691  |
| C | 2.396906  | -3.501711 | 0.455741  |
| C | 1.135266  | -2.678279 | 0.233611  |
| C | 3.344469  | 0.029520  | -0.210756 |
| C | 2.636909  | 1.286667  | -0.248172 |
| C | 0.970849  | 2.877204  | -0.179334 |
| C | 3.264223  | 2.594109  | 0.196451  |
| C | -0.294860 | 3.355416  | 0.045559  |
| C | -1.473893 | 2.521321  | -0.049766 |
| C | -3.250291 | 1.272361  | 0.889638  |
| C | -2.864545 | 0.800687  | -0.529628 |
| C | -2.621106 | -0.702167 | -0.764149 |
| N | -1.340511 | -1.166747 | -0.223147 |
| C | -1.318096 | -2.466821 | 0.091626  |
| C | -2.739820 | -2.992391 | 0.027466  |
| C | -3.597210 | -1.714608 | -0.134190 |
| C | -0.174788 | -3.206792 | 0.348132  |
| H | 4.122642  | 2.880099  | -0.424114 |
| H | -0.410971 | 4.326972  | 0.516537  |
| H | -4.327072 | 1.256135  | 1.074063  |
| H | -3.921881 | -1.357595 | 0.846285  |
| H | -3.001314 | -3.586315 | 0.905528  |
| H | -0.291578 | -4.251097 | 0.608965  |
| H | 2.386283  | -4.427841 | -0.124081 |
| H | 3.944195  | -2.805556 | -0.926621 |
| H | 4.429201  | 0.067321  | -0.163350 |
| H | -2.764022 | 0.641701  | 1.641123  |

|   |           |           |           |
|---|-----------|-----------|-----------|
| H | -3.342768 | 3.437491  | 0.548034  |
| H | 3.614166  | 2.525638  | 1.236094  |
| H | 4.327976  | -2.459267 | 0.756529  |
| H | 2.470728  | -3.784723 | 1.511369  |
| H | -2.833740 | -3.647458 | -0.845805 |
| H | -4.485345 | -1.874710 | -0.746904 |
| N | 1.394064  | -1.416264 | -0.061759 |
| C | 1.335138  | 1.524342  | -0.540697 |
| N | 2.160346  | 3.552435  | 0.066577  |
| H | 0.624819  | 0.826151  | -0.929760 |
| N | -1.633388 | 1.532004  | -0.866657 |
| C | -2.639226 | 2.685044  | 0.927426  |
| H | -2.320705 | 3.004424  | 1.921934  |
| H | 2.147822  | 4.355641  | 0.676474  |
| H | -0.455494 | -0.680024 | -0.347790 |
| H | -2.597473 | -0.843139 | -1.854189 |
| H | -3.654407 | 1.093980  | -1.238950 |

\*\*\*\*\*

75

N1-Con-PFPh-Corrin

|   |           |           |           |
|---|-----------|-----------|-----------|
| C | 1.320677  | 1.711206  | -0.247191 |
| C | 2.656026  | 2.433038  | -0.112943 |
| C | 3.636916  | 1.285386  | 0.184900  |
| C | 2.788277  | 0.052645  | -0.084281 |
| C | 0.092054  | 2.319074  | -0.295075 |
| C | -1.175936 | 1.614183  | -0.360083 |
| C | -2.823713 | -0.008878 | -0.353699 |
| C | -2.515775 | 2.310370  | -0.512231 |
| C | -3.390650 | -1.264096 | -0.199560 |
| C | -2.515556 | -2.443700 | -0.270184 |
| C | -1.184990 | -4.201199 | 0.581107  |
| C | -0.818190 | -3.804954 | -0.864740 |
| C | 0.661609  | -3.601039 | -1.233332 |
| N | 1.215113  | -2.337392 | -0.726852 |
| C | 2.515219  | -2.380170 | -0.432873 |
| C | 2.985570  | -3.815415 | -0.562110 |
| C | 1.675086  | -4.622581 | -0.685830 |
| C | 3.306210  | -1.275056 | -0.110431 |
| H | -2.577995 | 2.907431  | -1.430485 |
| H | -1.144763 | -5.277613 | 0.760591  |
| H | 1.359205  | -4.969810 | 0.300448  |
| H | 3.610048  | -4.125726 | 0.277144  |
| H | 4.533290  | 1.306129  | -0.438652 |
| H | 2.910573  | 2.935551  | -1.050935 |
| H | -0.512976 | -3.709047 | 1.291986  |
| H | -3.361425 | -4.331199 | 0.378633  |
| H | -2.723394 | 2.974613  | 0.335877  |
| H | 2.638609  | 3.193586  | 0.669428  |
| H | 3.968116  | 1.293148  | 1.227797  |
| H | 3.593395  | -3.901778 | -1.469040 |



|   |           |           |           |
|---|-----------|-----------|-----------|
| H | 1.776635  | -5.494083 | -1.332998 |
| N | 1.516373  | 0.344674  | -0.297341 |
| C | -1.408791 | 0.281675  | -0.280601 |
| N | -3.450637 | 1.191825  | -0.551559 |
| H | -0.671753 | -0.468669 | -0.103708 |
| N | -1.565248 | -2.563314 | -1.129088 |
| C | -2.603084 | -3.611887 | 0.709986  |
| H | -2.865661 | -3.296878 | 1.721804  |
| H | -4.440373 | 1.328287  | -0.440209 |
| H | 0.766203  | -1.432464 | -0.851773 |
| H | 0.711326  | -3.569421 | -2.329673 |
| H | -1.195835 | -4.573770 | -1.555884 |
| C | 0.047106  | 3.813556  | -0.266030 |
| C | 0.430995  | 4.589776  | -1.362334 |
| C | -0.391146 | 4.515097  | 0.860115  |
| C | 0.390710  | 5.979251  | -1.346039 |
| C | -0.447524 | 5.902838  | 0.903849  |
| C | -0.053421 | 6.639143  | -0.206947 |
| C | -4.828418 | -1.467747 | 0.037884  |
| C | -5.555718 | -2.461794 | -0.640121 |
| C | -5.574127 | -0.727396 | 0.970730  |
| C | -6.903969 | -2.702429 | -0.417117 |
| C | -6.927966 | -0.935425 | 1.199312  |
| C | -7.601532 | -1.931759 | 0.505052  |
| C | 4.748722  | -1.492659 | 0.197531  |
| C | 5.677040  | -1.843722 | -0.786589 |
| C | 5.256122  | -1.346991 | 1.492140  |
| C | 7.023841  | -2.046900 | -0.510378 |
| C | 6.598787  | -1.533382 | 1.797495  |
| C | 7.487638  | -1.888134 | 0.789732  |
| F | 0.858994  | 3.995598  | -2.487449 |
| F | 0.767735  | 6.684082  | -2.418253 |
| F | -0.099509 | 7.972414  | -0.178794 |
| F | -0.868360 | 6.533910  | 2.005179  |
| F | -0.767353 | 3.841614  | 1.959147  |
| F | -4.944812 | -3.217491 | -1.569108 |
| F | -7.544330 | -3.657033 | -1.102993 |
| F | -8.902280 | -2.147585 | 0.722075  |
| F | -7.581381 | -0.199044 | 2.107007  |
| F | -4.969315 | 0.217901  | 1.716005  |
| F | 4.430189  | -1.018229 | 2.498419  |
| F | 7.039614  | -1.385667 | 3.051052  |
| F | 8.778377  | -2.075758 | 1.069182  |
| F | 7.875989  | -2.383245 | -1.484375 |
| F | 5.276329  | -1.992400 | -2.060558 |

45

N2-Con-Corrin

|   |           |           |           |
|---|-----------|-----------|-----------|
| C | -2.871269 | -0.439753 | 0.003748  |
| C | -3.952392 | -1.370201 | -0.539836 |

|   |           |           |           |
|---|-----------|-----------|-----------|
| C | -3.231285 | -2.734531 | -0.574568 |
| C | -1.805648 | -2.369827 | -0.168348 |
| C | -3.119467 | 0.977195  | 0.204374  |
| C | -2.185392 | 1.963393  | 0.166637  |
| C | -0.161372 | 2.829963  | 0.021417  |
| C | -2.431710 | 3.453882  | 0.397906  |
| C | 1.276222  | 2.877476  | -0.157859 |
| C | 2.037665  | 1.796804  | -0.446906 |
| C | 2.847577  | -0.467231 | -0.736067 |
| C | 2.730486  | -1.834348 | -0.027631 |
| N | 1.602654  | -2.549137 | -0.659549 |
| C | 0.629831  | -2.637634 | 0.164732  |
| C | 0.920311  | -2.159507 | 1.579084  |
| C | 2.407649  | -1.766974 | 1.495296  |
| C | -0.704252 | -3.142509 | -0.231441 |
| H | -2.992830 | 3.634507  | 1.316679  |
| H | 1.755963  | 3.840485  | -0.003050 |
| H | 3.988168  | 0.289490  | 0.796685  |
| H | 3.034126  | -2.475531 | 2.040931  |
| H | 0.726008  | -2.962139 | 2.297323  |
| H | -0.764770 | -4.138609 | -0.657117 |
| H | -3.664198 | -3.440278 | 0.139663  |
| H | -4.839585 | -1.363368 | 0.100908  |
| H | -4.156451 | 1.268704  | 0.344997  |
| H | 4.050303  | 2.485635  | 0.113081  |
| H | 3.070426  | -0.677240 | -1.787380 |
| H | -3.012252 | 3.879461  | -0.425894 |
| H | -4.276278 | -1.036362 | -1.531076 |
| H | -3.266535 | -3.205937 | -1.558487 |
| H | 0.254415  | -1.333117 | 1.836485  |
| H | 2.591352  | -0.780153 | 1.928319  |
| N | -1.738703 | -1.027217 | 0.227674  |
| C | 3.552061  | 1.764457  | -0.538493 |
| C | 1.560977  | 0.390731  | -0.654559 |
| H | 0.890656  | 0.102609  | 0.156592  |
| H | 0.931511  | 0.307781  | -1.544694 |
| N | 3.946202  | 0.381137  | -0.214447 |
| C | -0.999732 | 4.030645  | 0.438513  |
| N | -0.849861 | 1.735627  | -0.118929 |
| H | 3.859411  | 1.988444  | -1.569843 |
| H | -0.712126 | 4.368456  | 1.440071  |
| H | -0.847702 | 4.877253  | -0.236788 |
| H | 3.656789  | -2.385135 | -0.216658 |

75

N2-Con-PFPh-Corrin

|   |          |          |           |
|---|----------|----------|-----------|
| C | 1.206974 | 1.805876 | 0.046654  |
| C | 2.452321 | 2.600870 | 0.426348  |
| C | 3.537805 | 1.509292 | 0.478229  |
| C | 2.803139 | 0.282427 | -0.042905 |

|   |           |           |           |
|---|-----------|-----------|-----------|
| C | -0.121127 | 2.419996  | 0.035102  |
| C | -1.305454 | 1.741065  | 0.122826  |
| C | -2.639976 | -0.009280 | 0.191907  |
| C | -2.696280 | 2.366622  | 0.084858  |
| C | -3.040670 | -1.411233 | 0.245580  |
| C | -2.148881 | -2.435554 | 0.289135  |
| C | -0.141181 | -3.776900 | 0.138898  |
| C | 1.109219  | -3.878296 | -0.758366 |
| N | 2.161146  | -3.075958 | -0.104776 |
| C | 2.396753  | -2.031163 | -0.797593 |
| C | 1.698868  | -1.951890 | -2.143406 |
| C | 0.949860  | -3.299159 | -2.195875 |
| C | 3.294646  | -0.958033 | -0.275863 |
| H | -2.814329 | 3.041565  | -0.765029 |
| H | -1.337522 | -4.489317 | -1.373978 |
| H | 1.407680  | -3.973559 | -2.921687 |
| H | 2.434081  | -1.837093 | -2.944110 |
| H | 4.411563  | 1.746140  | -0.132497 |
| H | 2.667098  | 3.361119  | -0.330725 |
| H | -3.375155 | -4.142104 | -0.371918 |
| H | 0.136694  | -4.187854 | 1.114825  |
| H | -2.880503 | 2.949053  | 0.991107  |
| H | 2.322356  | 3.125594  | 1.376429  |
| H | 3.886220  | 1.348548  | 1.499696  |
| H | 1.044926  | -1.078449 | -2.178898 |
| H | -0.094350 | -3.171898 | -2.492786 |
| N | 1.448024  | 0.566163  | -0.245371 |
| C | -2.480443 | -3.915928 | 0.210872  |
| C | -0.656924 | -2.327516 | 0.331012  |
| H | -0.310102 | -1.632407 | -0.434881 |
| H | -0.318543 | -1.865962 | 1.262791  |
| N | -1.290203 | -4.562215 | -0.361607 |
| C | -3.620448 | 1.138171  | 0.009025  |
| N | -1.395376 | 0.368204  | 0.261169  |
| H | -2.647555 | -4.300971 | 1.227009  |
| H | -4.130017 | 1.060520  | -0.956084 |
| H | -4.394828 | 1.129576  | 0.780241  |
| C | -0.164557 | 3.912460  | -0.043604 |
| C | -0.569226 | 4.711091  | 1.028171  |
| C | 0.216909  | 4.587944  | -1.205764 |
| C | -0.604746 | 6.098665  | 0.954471  |
| C | 0.195319  | 5.973119  | -1.308017 |
| C | -0.219661 | 6.732825  | -0.220353 |
| C | -4.508479 | -1.711163 | 0.199510  |
| C | -5.219838 | -2.060465 | 1.347959  |
| C | -5.233676 | -1.664824 | -0.991325 |
| C | -6.579312 | -2.350991 | 1.321085  |
| C | -6.592675 | -1.947431 | -1.049394 |
| C | -7.268246 | -2.293339 | 0.115398  |
| C | 4.688075  | -1.345889 | 0.044642  |

|   |           |           |           |
|---|-----------|-----------|-----------|
| C | 5.235130  | -1.247077 | 1.327321  |
| C | 5.517486  | -1.908829 | -0.931407 |
| C | 6.530382  | -1.658438 | 1.619793  |
| C | 6.811655  | -2.331397 | -0.667008 |
| C | 7.323488  | -2.203550 | 0.619179  |
| F | 0.562643  | 6.578516  | -2.441233 |
| F | 0.619365  | 3.887722  | -2.277637 |
| F | -0.935635 | 4.141686  | 2.187865  |
| F | -0.998425 | 6.825382  | 2.004727  |
| F | -0.248027 | 8.063145  | -0.304147 |
| F | 5.061224  | -2.040599 | -2.189063 |
| F | 7.572108  | -2.848553 | -1.638414 |
| F | 8.568625  | -2.601957 | 0.889192  |
| F | 7.011571  | -1.547511 | 2.863197  |
| F | 4.500894  | -0.765259 | 2.342739  |
| F | -4.610424 | -1.339386 | -2.136692 |
| F | -7.251265 | -1.893904 | -2.210694 |
| F | -8.571739 | -2.568808 | 0.075460  |
| F | -7.226846 | -2.680893 | 2.441667  |
| F | -4.590565 | -2.120804 | 2.530783  |
| H | 1.418213  | -4.927336 | -0.777708 |

45

Neo-Con-Corrin

|   |           |           |           |
|---|-----------|-----------|-----------|
| C | -2.827962 | -0.580828 | 0.034643  |
| C | -3.883673 | -1.544784 | -0.503849 |
| C | -3.105318 | -2.873438 | -0.599780 |
| C | -1.685399 | -2.455228 | -0.227033 |
| C | -3.144531 | 0.817301  | 0.261718  |
| C | -2.264530 | 1.853902  | 0.268917  |
| C | -0.316378 | 2.858864  | 0.014346  |
| C | -2.611683 | 3.331164  | 0.460198  |
| C | 1.105286  | 2.987966  | -0.221315 |
| C | 1.934548  | 1.930675  | -0.385898 |
| C | 2.790108  | -1.648128 | -0.126034 |
| N | 1.676302  | -2.347842 | -0.803345 |
| C | 0.763798  | -2.620622 | 0.048491  |
| C | 1.098834  | -2.317119 | 1.500876  |
| C | 2.567786  | -1.878129 | 1.406315  |
| C | -0.554510 | -3.175329 | -0.341661 |
| H | -2.998943 | 3.507832  | 1.467186  |
| H | 1.513345  | 3.994079  | -0.256884 |
| H | 4.822140  | 0.274357  | -0.671061 |
| H | 3.234368  | -2.669185 | 1.758080  |
| H | 0.949629  | -3.206186 | 2.120998  |
| H | -0.582013 | -4.167243 | -0.780644 |
| H | -3.483754 | -3.616838 | 0.107143  |
| H | -4.749645 | -1.595601 | 0.163394  |
| H | -4.200077 | 1.056940  | 0.353123  |
| H | 3.916446  | 2.808909  | -0.095979 |

|   |           |           |           |
|---|-----------|-----------|-----------|
| H | -3.381266 | 3.658106  | -0.242630 |
| H | -4.252792 | -1.198907 | -1.474986 |
| H | -3.150707 | -3.318980 | -1.595262 |
| H | 0.422024  | -1.545517 | 1.878012  |
| H | 2.786549  | -0.984499 | 1.995085  |
| N | -1.662973 | -1.122363 | 0.206477  |
| C | 3.425979  | 1.987284  | -0.622303 |
| C | 1.544989  | 0.485667  | -0.308302 |
| H | 1.110515  | 0.299421  | 0.687285  |
| H | 0.749619  | 0.219270  | -1.005406 |
| C | -1.256429 | 4.035863  | 0.231405  |
| N | -0.908650 | 1.700916  | 0.048664  |
| H | 3.611964  | 2.112532  | -1.695982 |
| H | -0.937903 | 4.646540  | 1.081425  |
| H | -1.258854 | 4.691528  | -0.645391 |
| N | 2.779233  | -0.258678 | -0.575443 |
| C | 3.897846  | 0.590537  | -0.179720 |
| H | 4.079254  | 0.591703  | 0.911940  |
| H | 3.740127  | -2.076184 | -0.460004 |

75

Neo-Con-PFPh-Corrin

|   |           |           |           |
|---|-----------|-----------|-----------|
| C | -1.193074 | 1.809808  | 0.018726  |
| C | -2.408572 | 2.602697  | -0.453024 |
| C | -3.494337 | 1.514711  | -0.549619 |
| C | -2.803784 | 0.300459  | 0.054224  |
| C | 0.137366  | 2.415413  | 0.070027  |
| C | 1.320597  | 1.729650  | 0.044892  |
| C | 2.654168  | -0.022322 | -0.021469 |
| C | 2.713204  | 2.355181  | 0.064144  |
| C | 3.042652  | -1.425963 | -0.060667 |
| C | 2.143602  | -2.439313 | 0.049230  |
| C | -1.132229 | -3.793876 | 1.042878  |
| N | -2.123880 | -3.023975 | 0.261374  |
| C | -2.455560 | -1.980402 | 0.916119  |
| C | -1.914498 | -1.872708 | 2.330856  |
| C | -1.213602 | -3.230809 | 2.499946  |
| C | -3.315809 | -0.930250 | 0.291573  |
| H | 2.856117  | 2.974775  | 0.952636  |
| H | 1.063348  | -5.551784 | 0.578661  |
| H | -1.814106 | -3.901856 | 3.117937  |
| H | -2.731365 | -1.715917 | 3.039259  |
| H | -4.407204 | 1.771324  | -0.008085 |
| H | -2.664152 | 3.378369  | 0.275694  |
| H | 3.417389  | -4.147871 | 0.548446  |
| H | 2.869439  | 2.995837  | -0.805947 |
| H | -2.219511 | 3.108505  | -1.403242 |
| H | -3.771073 | 1.327489  | -1.588410 |
| H | -1.247047 | -1.011132 | 2.409226  |
| H | -0.230522 | -3.150572 | 2.969025  |

|   |           |           |           |
|---|-----------|-----------|-----------|
| N | -1.461532 | 0.581365  | 0.334566  |
| C | 2.457347  | -3.915351 | 0.084817  |
| C | 0.667168  | -2.288415 | 0.246330  |
| H | 0.500594  | -1.658970 | 1.134494  |
| H | 0.185706  | -1.743666 | -0.567422 |
| C | 3.643727  | 1.128779  | 0.045518  |
| N | 1.406725  | 0.352216  | -0.024380 |
| H | 2.476547  | -4.294948 | -0.944590 |
| H | 4.266546  | 1.057439  | 0.941444  |
| H | 4.319764  | 1.118375  | -0.814013 |
| N | 0.154363  | -3.656275 | 0.368622  |
| C | 1.248038  | -4.504069 | 0.829132  |
| H | 1.419638  | -4.441438 | 1.919836  |
| H | -1.392136 | -4.855509 | 1.006313  |
| C | 0.185484  | 3.910603  | 0.090357  |
| C | 0.585900  | 4.667405  | -1.012475 |
| C | -0.191908 | 4.629026  | 1.227435  |
| C | 0.622286  | 6.056687  | -0.991756 |
| C | -0.169060 | 6.017302  | 1.277095  |
| C | 0.242194  | 6.734900  | 0.159970  |
| C | 4.501041  | -1.739245 | -0.195481 |
| C | 5.057118  | -2.121900 | -1.416658 |
| C | 5.372465  | -1.670857 | 0.891610  |
| C | 6.406993  | -2.424622 | -1.556095 |
| C | 6.726087  | -1.964404 | 0.782343  |
| C | 7.244828  | -2.344501 | -0.450080 |
| C | -4.682651 | -1.330264 | -0.115094 |
| C | -5.136533 | -1.264760 | -1.436262 |
| C | -5.579790 | -1.872580 | 0.811642  |
| C | -6.406668 | -1.687695 | -1.810857 |
| C | -6.850647 | -2.306381 | 0.465053  |
| C | -7.268908 | -2.211446 | -0.857154 |
| F | 0.271624  | 8.067517  | 0.193253  |
| F | -0.532666 | 6.665554  | 2.387645  |
| F | -0.593044 | 3.970165  | 2.325393  |
| F | 1.012662  | 6.743130  | -2.070084 |
| F | 0.948467  | 4.053205  | -2.150486 |
| F | -5.216522 | -1.972192 | 2.102362  |
| F | -7.678067 | -2.802667 | 1.391803  |
| F | -8.490616 | -2.620985 | -1.206353 |
| F | -6.797383 | -1.608459 | -3.087909 |
| F | -4.332959 | -0.805272 | -2.407882 |
| F | 4.903202  | -1.311538 | 2.098355  |
| F | 4.281043  | -2.205857 | -2.506620 |
| F | 6.903989  | -2.787993 | -2.741514 |
| F | 8.541269  | -2.630760 | -0.570252 |
| F | 7.528387  | -1.888812 | 1.848302  |

|   |           |           |           |
|---|-----------|-----------|-----------|
| C | -1.276522 | 1.661990  | 0.039474  |
| N | -1.394917 | 0.303742  | -0.075954 |
| C | -2.648958 | 2.326857  | 0.112219  |
| C | -3.617444 | 1.135332  | 0.079256  |
| C | -2.674274 | -0.045951 | -0.068330 |
| C | -0.088435 | 2.358660  | 0.078444  |
| C | 1.233543  | 1.774186  | 0.031228  |
| N | 1.488747  | 0.498977  | 0.120860  |
| C | 2.858975  | 0.279466  | -0.009197 |
| C | 3.584938  | 1.571179  | -0.342464 |
| C | 2.488367  | 2.629447  | -0.125329 |
| C | 3.365067  | -0.966114 | 0.163001  |
| C | 2.422655  | -2.056371 | 0.550381  |
| C | 1.700892  | -2.100156 | 1.887155  |
| C | 0.958720  | -3.448345 | 1.809123  |
| C | 1.086293  | -3.845974 | 0.312512  |
| C | -0.189210 | -3.659122 | -0.530422 |
| N | -0.878413 | -2.374170 | -0.297548 |
| C | -2.207085 | -2.458619 | -0.292448 |
| C | -2.606871 | -3.905579 | -0.492858 |
| C | -1.302951 | -4.680514 | -0.239659 |
| C | -3.104024 | -1.390310 | -0.173767 |
| H | -0.430926 | -1.450564 | -0.271402 |
| H | 2.659371  | 3.214849  | 0.783891  |
| H | 4.465327  | 1.722773  | 0.285088  |
| H | 1.034679  | -1.239042 | 1.970425  |
| H | -0.079269 | -3.370726 | 2.138043  |
| H | -1.209108 | -5.571553 | -0.860600 |
| H | -2.957298 | -4.026965 | -1.524514 |
| H | -4.209990 | 1.044716  | 0.994288  |
| H | -2.748693 | 2.927159  | 1.019559  |
| N | 2.146624  | -3.001205 | -0.261130 |
| H | 1.447009  | -4.197140 | 2.435636  |
| H | 2.412291  | -2.046100 | 2.713934  |
| H | 1.374908  | -4.895383 | 0.189941  |
| H | 3.920673  | 1.563413  | -1.381461 |
| H | 2.402250  | 3.338590  | -0.951642 |
| H | 0.115320  | -3.702684 | -1.582464 |
| H | -2.802265 | 2.997276  | -0.736226 |
| H | -4.321655 | 1.186987  | -0.754127 |
| H | -3.423300 | -4.208911 | 0.162020  |
| H | -1.254390 | -4.994049 | 0.806565  |
| C | 4.777648  | -1.324112 | -0.076774 |
| C | 5.448036  | -1.045030 | -1.273503 |
| C | 5.516807  | -2.033010 | 0.878749  |
| C | 6.768240  | -1.418401 | -1.497122 |
| C | 6.832011  | -2.424150 | 0.679378  |
| C | 7.465860  | -2.111744 | -0.517663 |
| C | -0.159054 | 3.851556  | 0.162593  |
| C | 0.126189  | 4.530646  | 1.349281  |

|   |           |           |           |
|---|-----------|-----------|-----------|
| C | -0.499829 | 4.646989  | -0.933469 |
| C | 0.077673  | 5.915680  | 1.451004  |
| C | -0.561784 | 6.033691  | -0.861901 |
| C | -0.269789 | 6.671272  | 0.337715  |
| C | -4.567644 | -1.682986 | -0.163657 |
| C | -5.213724 | -2.184846 | 0.969070  |
| C | -5.374525 | -1.457194 | -1.281650 |
| C | -6.576969 | -2.452943 | 0.997317  |
| C | -6.741488 | -1.708799 | -1.282068 |
| C | -7.344997 | -2.211431 | -0.135584 |
| F | 4.811513  | -0.424035 | -2.279320 |
| F | 7.364250  | -1.132207 | -2.660650 |
| F | 8.733805  | -2.477190 | -0.723182 |
| F | 7.498230  | -3.085333 | 1.633217  |
| F | 4.947806  | -2.342622 | 2.057771  |
| F | -4.507936 | -2.428422 | 2.085459  |
| F | -7.154897 | -2.934412 | 2.102625  |
| F | -8.654917 | -2.461296 | -0.122459 |
| F | -7.476870 | -1.479173 | -2.374457 |
| F | -4.829343 | -0.977697 | -2.410680 |
| F | 0.461905  | 3.836573  | 2.448760  |
| F | 0.355954  | 6.525060  | 2.608374  |
| F | -0.323568 | 8.001838  | 0.420465  |
| F | -0.893465 | 6.757616  | -1.936257 |
| F | -0.782160 | 4.072906  | -2.114193 |

---
